# Supplementary material for: Influence of government price regulation and deregulation on the price of antineoplastic medications in China: a controlled interrupted time series study
Source: PubMed Central journal article supplement — BMJ Open. 2019 Nov 28;9(11):e031658. doi: 10.1136/bmjopen-2019-031658 (PMC6924745; doi:10.1136/bmjopen-2019-031658), 2019-11-28
Supplement: bmjopen-2019-031658.draft_revisions.pdf [file bmjopen-2019-031658.draft_revisions.pdf]

# BMJ Open

BMJ Open is committed to open peer review. As part of this commitment we make the peer review history of every article we publish publicly available.

When an article is published we post the peer reviewers' comments and the authors' responses online. We also post the versions of the paper that were used during peer review. These are the versions that the peer review comments apply to.

The versions of the paper that follow are the versions that were submitted during the peer review process. They are not the versions of record or the final published versions. They should not be cited or distributed as the published version of this manuscript.

BMJ Open is an open access journal and the full, final, typeset and author-corrected version of record of the manuscript is available on our site with no access controls, subscription charges or pay-per-view fees (<http://bmjopen.bmj.com>).

If you have any questions on BMJ Open's open peer review process please email [info.bmjopen@bmj.com](mailto:info.bmjopen@bmj.com)

# BMJ Open

## Influence of Government Price Regulation and Deregulation on the Price of Antineoplastic Medications in China

|                               |                                                                                                                                                                                                                                                                                                                                                                                                                                                                                                                                                                                                                                                                                                                                                                                                                                                                                                                                                                                            |
|-------------------------------|--------------------------------------------------------------------------------------------------------------------------------------------------------------------------------------------------------------------------------------------------------------------------------------------------------------------------------------------------------------------------------------------------------------------------------------------------------------------------------------------------------------------------------------------------------------------------------------------------------------------------------------------------------------------------------------------------------------------------------------------------------------------------------------------------------------------------------------------------------------------------------------------------------------------------------------------------------------------------------------------|
| Journal:                      | <i>BMJ Open</i>                                                                                                                                                                                                                                                                                                                                                                                                                                                                                                                                                                                                                                                                                                                                                                                                                                                                                                                                                                            |
| Manuscript ID                 | bmjopen-2019-031658                                                                                                                                                                                                                                                                                                                                                                                                                                                                                                                                                                                                                                                                                                                                                                                                                                                                                                                                                                        |
| Article Type:                 | Research                                                                                                                                                                                                                                                                                                                                                                                                                                                                                                                                                                                                                                                                                                                                                                                                                                                                                                                                                                                   |
| Date Submitted by the Author: | 14-May-2019                                                                                                                                                                                                                                                                                                                                                                                                                                                                                                                                                                                                                                                                                                                                                                                                                                                                                                                                                                                |
| Complete List of Authors:     | Guan, Xiaodong; School of Pharmceutial Sciences, Peking University, Department of Pharmacy Adiministration and Clinical Pharmacy; Harvard Medical School and Harvard Pilgrim Health Care Institute, Department of Population Medicine<br>Wushouer, Haishaerjiang; Chinese Academy of Engineering, Center for Strategic Studies; Tsinghua University, School of Medicine<br>Yang, Mingchun; School of Pharmceutial Sciences, Peking University, Department of Pharmacy Adiministration and Clinical Pharmacy<br>Han, Sheng; Peking University, International Research Center for Medicinal Administration<br>Shi, Luwen; School of Pharmceutial Sciences, Peking University, Department of Pharmacy Adiministration and Clinical Pharmacy<br>Ross-Degnan, Dennis; Harvard Medical School and Harvard Pilgrim Health Care Institute, Department of Population Medicine<br>Wagner, Anita; Harvard Medical School and Harvard Pilgrim Health Care Institute, Department of Population Medicine |
| Keywords:                     | Price Regulation, Deregulation, Laspeyres index, Antineoplastic Medications                                                                                                                                                                                                                                                                                                                                                                                                                                                                                                                                                                                                                                                                                                                                                                                                                                                                                                                |
|                               |                                                                                                                                                                                                                                                                                                                                                                                                                                                                                                                                                                                                                                                                                                                                                                                                                                                                                                                                                                                            |

SCHOLARONE™  
Manuscripts

1  
2  
3  
4  
5  
6  
7  
8  
9

## **Influence of Government Price Regulation and Deregulation on the Price of Antineoplastic Medications in China**

Xiaodong Guan <sup>1,2,3</sup>, Haishaerjiang Wushouer <sup>2,4,5</sup>, Mingchun Yang <sup>1</sup>, Sheng Han<sup>2</sup>, Luwen Shi <sup>1,2\*</sup>, Dennis Ross-Degnan <sup>3</sup>, Anita Katharina Wagner <sup>3</sup>

- 10  
11  
12  
13  
14  
15  
16  
17  
18  
19  
20
1. Department of Pharmacy Administration and Clinical Pharmacy, School of Pharmaceutical Sciences, Peking University, Beijing, China.
  2. International Research Center for Medicinal Administration, Peking University, Beijing, China.
  3. Department of Population Medicine, Harvard Medical School and Harvard Pilgrim Health Care Institute, Boston, Massachusetts, USA.
  4. Center for Strategic Studies, Chinese Academy of Engineering, Beijing, China.
  5. School of Medicine, Tsinghua University, Beijing, China.

21  
22

Corresponding Author:

23  
24

Name: Luwen SHI

Title: Professor

25  
26

Address: 38 Xueyuan Road, Beijing, China, 100191

27

Phone: +86 10 82805019

28

Fax number: +86 10 82805019

29  
30

Email: [shiluwen211@163.com](mailto:shiluwen211@163.com)

31  
32

Word count: 3325

33  
34  
35  
36  
37  
38  
39  
40

LWS conceived the study. XDG designed the study. All authors acquired and analysed the data. HW, MCY, SH, DRD and AKW interpreted the findings. XDG and MCY wrote the first draft of the manuscript. DRD, AKW and HW drafted subsequent versions. All authors critically reviewed this report and approved the final version.

41  
42  
43  
44

**Keywords:** Price Regulation, Deregulation, Laspeyres index, Antineoplastic Medications

## ABSTRACT

Background: In October 2012, the Chinese government established maximum retail prices for specific products, including 30 antineoplastic medications. Three years later, in June 2015, the government abolished price regulation for most medications, including all antineoplastic medications. This study examined the impacts of regulation and subsequent deregulation of prices of antineoplastic medications in China.

Methods: Using hospital procurement data and an interrupted time series (ITS) with comparison series design, we examined the impacts of the policy changes on relative purchase prices, volumes, and spending of 52 antineoplastic medications in 699 hospitals.

Results: We identified three policy periods: prior to the initial price regulation (October 2011 to September 2012); during price regulation (October 2012 to June 2015); and after price deregulation (July 2015 to June 2016). During government price regulation, compared to price-unregulated cancer medications ( $n = 22$  mostly newer targeted therapies), the relative price of price-regulated medications ( $n = 30$  mostly cytotoxic products) decreased significantly ( $\beta = -0.081$ ,  $P < 0.001$ ). After the government price deregulation, the relative price of price-unregulated medications decreased significantly ( $\beta = -0.013$ ,  $P < 0.05$ ).

Conclusion: Neither government price regulation nor deregulation significantly impacted the average volumes or average spending on all antineoplastic medications immediately after the policy changes or in the longer term ( $P > 0.05$ ). To control the rapid growth of oncology medication expenditures, more effective measures than price regulation of selected products are needed.

### Strengths and limitations

- An interrupted time series (ITS) design, with two breakpoints was adopted to assess changes following implementation of two price policies.
- The study added value to the understanding of the effect of government regulation and deregulation of the prices of cancer medications, in the context of provincial policies.
- We were unable to obtain the full list of products under government price regulation since 1996, which could lead to selection bias.
- The comparison group of price-unregulated oncology medications tended to include newer, more expensive products than the price-regulated group
- Given our use of aggregated hospital procurement data, we could not assess factors such as the numbers of patients treated within a given level of medication spending or volume.

## Introduction

Cancer medications account for the highest proportion of pharmaceutical spending among all therapeutic classes.<sup>1</sup> Rising cancer medication prices contribute to the rapid rise of medical and pharmaceutical expenditures, drawing criticism from leading academics, patients, cancer specialists, and policy experts.<sup>2,3,4</sup> In response, policy makers are implementing a variety of regulatory controls.<sup>5</sup>

International studies of the roles of regulation and competition in the pharmaceutical market have addressed various challenges and benefits of government price control policies, and results and perspectives are mixed.<sup>6,7</sup> Srinivasan (2013) argues that the pharmaceutical market requires government regulation because of market failures,<sup>8</sup> such as information asymmetry and perverse incentives which affect pricing, professional ethics and competition.<sup>9</sup> Studies in a number of settings have found that government regulation can be effective in reducing medication prices.<sup>10,11</sup> However, researchers have reported favorable effects of market competition on medication prices and argued that the high price of medications is due in part to interfering government controls.<sup>12</sup> In critics' eyes, government regulation constitutes a barrier to dynamic competition, resulting in consumers not being able benefit fully from competition on pharmaceutical prices.<sup>13</sup>

In China, the government has introduced complex medication price control policies to decrease medication prices. First, after the Urban Employee Basic Medical Insurance (UEBMI) was established in 1998, the National Development and Reform Commission (NDRC) was required to set a highest retail price for each medication listed in the national insurance medication formulary.<sup>14</sup> In addition, because medication expenditures accounted for 40% of total health expenditures and almost 70% of medication sales were in hospitals,<sup>15</sup> since 2010, provinces had to conduct a centralized bidding and tendering process to procure hospital medications, with the intent to decrease prices and curb medication expenditures.<sup>16</sup>

In October 2012, the NDRC established maximum retail prices for specific products listed in the 2009 National Reimbursement List, including 36 antineoplastic medications. Following the central government's requirement to limit regulatory controls in economic management, China loosened administrative controls over medication prices and the NDRC formally abolished price ceiling policies in 2015.<sup>17</sup> Improvement of access to price-regulated medications after the 2012 price regulation and price increases after the 2015 government price deregulation were expected. However, a complicated web of policies influence hospital medication use and spending in China. (Table 1) For example, the price-regulated products were also listed on the insurance reimbursement list and are therefore subject to a hospital spending limit for insurance-reimbursable medications. In addition, all medications procured by hospitals also undergo price negotiation by the provincial government. Lastly, the price-regulated antineoplastic group comprised mostly cytotoxic chemotherapy medications; newer, more costly targeted anticancer medications were not subject to price regulation. The effect of government regulation and deregulation of the prices of cancer medications, in the context of provincial policies, is unknown.

Therefore, we studied impacts of NDRC price regulation and deregulation on the relative prices and sales volume and spending on antineoplastic medications in China.

Table 1. Policies affecting medication sales in Chinese hospitals

|                               | Centralized<br>provincial<br>procurement | Insurance<br>reimbursement<br>listing | Hospital<br>spending limit |
|-------------------------------|------------------------------------------|---------------------------------------|----------------------------|
| Price-regulated medications   | √                                        | √                                     | √                          |
| Price-unregulated medications | √                                        | ×                                     | ×                          |

## Methods

### Study design

We used the strongest quasi-experimental design, an interrupted time series (ITS) design,<sup>18</sup> with two breakpoints to assess changes following implementation of two price policies. The first breakpoint served to assess the effects of the government retail price regulation in October 2012 on the Laspeyeres price ( $L_p$ ) index for, monthly volumes of and spending on the study medications. The second breakpoint served to assess the effects of government retail price deregulation in June 2015. To compare the effects of each policy intervention, we conducted analyses of medication groups for which 2012 price caps were and were not applied. The intervention group of medications had retail price caps as of October 2012 and the control group was without price caps throughout the study period. (Figure 1) We hypothesized that the impacts of price regulation or deregulation on purchase prices, volumes, and spending would differ between the two groups.

Figure 1. Timeline of price regulation and deregulation of 52 antineoplastic medications

### Data source

Data on products purchased between October 2011 and June 2016 were extracted from the observational Chinese Medical Economic Information (CEMI) database of public hospital medication purchasing records.<sup>19</sup> We conducted a search of all antineoplastic medications in the database by ATC code<sup>20</sup> and extracted data for 52 antineoplastic medications (30 medications with retail price caps from October 2012 to June 2015 and 20 medications without any price caps between October 2011 and June 2016, Appendix A) from 699 public hospitals. Data elements extracted for each product comprised the International Nonproprietary Name (INN), dosage form, strength, manufacturer, medication purchase price per package, monthly purchasing volumes and monthly hospital spending.

## Outcome measures

The primary outcome was the  $L_p$ , which reflects what happens to the price level of a fixed basket of goods in a given period of time, compared to the price of the basket of goods during a previous period.<sup>21</sup> In this study, the  $L_p$  was calculated based on equation (1):

$$L_{pt} = \frac{\sum P_{ijt} Q_{ij0}}{\sum P_{ij0} Q_{ij0}} \quad (1)$$

where  $P_{ijt}$  stands for price of medication  $i$  with dosage  $j$  in periods  $t$ , and  $Q_{ij0}$  stands for the volume for this medication used in period 0;  $P$  and  $Q$  were calculated in terms of Defined Daily Doses (DDD). The DDD used in this paper were the recommended daily amounts of each study medication based on dosage regimens recommended in the manufacturers' instructions, as approved by China Food and Drug Administration (CFDA). An  $L_p$  value of less than 1 means that the price of the basket of goods in a given period of time was lower than that in period 0, and a value of more than 1 means that the basket price in a given period was higher than that in period 0. The currency of price and spending was Chinese Yuan (CNY).<sup>22</sup>

Other outcomes of interest were average monthly purchasing volumes (number of DDD) of and average monthly hospital spending (CNY) on the 30 price-regulated, 22 price-unregulated and all 52 pharmaceuticals. All price and spending data were adjusted to October 2011 prices using the consumer price index for health care.<sup>23</sup>

## Statistical Analysis

We assessed outcomes over time for price-regulated medications (intervention group), price-unregulated medications (control group) and all 52 products together. We also modeled intervention effects using the monthly differences in the outcomes in the two groups to estimate the relative impacts of regulation and deregulation among the regulated products, controlling for any other externalities that may have affected outcomes in the control group products.

ITS models were used to estimate levels and trends of the outcomes in the pre-intervention periods and changes in levels and trends in the post-intervention periods. ITS models with two interruption points were formulated to detect the effect on  $L_p$ , monthly average purchasing volumes and spending, as in equation (2)<sup>18</sup>:

$$Y_{it} = \beta_0 + \beta_1 \times time_t + \beta_2 \times regulation + \beta_3 \times reg\_trend + \beta_4 \times deregulation + \beta_5 \times der\_trend + \varepsilon_{it} \quad (2)$$

We used  $\beta_0$  to estimate the baseline purchasing volume and spending;  $\beta_1$  estimated the pre-regulation trend;  $\beta_2$  estimated the change in level after the regulation policy;  $\beta_3$  estimated the change in trend after the regulation policy;  $\beta_4$  estimated the change in level after the deregulation policy;  $\beta_5$  estimated the change in trend after the deregulation policy. Key coefficients were  $\beta_2$ ,  $\beta_3$ ,  $\beta_4$  and  $\beta_5$ . To estimate the combined level and trend impacts of the policy changes, we calculated the absolute difference in  $Y_{it}$  at 12 months after regulation and deregulation, respectively,

1  
2  
3 compared to the counterfactual, that is, the estimated  $Y_{it}$  had the intervention not  
4 happened.<sup>18, 24</sup>

5  
6 We performed the Durbin-Watson test to estimate level of residual autocorrelations<sup>25</sup>  
7 and used the Cochrane-Orcutt auto-regression procedure to correct for first order  
8 serially correlated errors when needed.<sup>26</sup> All analyses were performed using Stata  
9 14.0.<sup>27</sup>  
10  
11

## 12 **Study Results**

### 13 **Influence of Government Pricing Policies on Relative Purchase Prices**

14 The Lp declined over time in both intervention and control medication groups (that is,  
15 prices decreased relative to baseline) from October 2011 to June 2016 (Table 2,  
16 Figure 2). After government price regulation in October 2012, the Lp for  
17 price-regulated medications dropped suddenly ( $\beta = -0.082$ ,  $P < 0.001$ ), with  
18 significant declines in Lp relative to price-unregulated medications ( $\beta = -0.081$ ,  $P <$   
19  $0.001$ ). At 12 months after the regulation, there was an estimated reduction in the Lp  
20 for price-regulated medications of 0.058 ( $P < 0.05$ ) and an estimated increase in the  
21 Lp for price-unregulated of 0.029 ( $P < 0.05$ ).  
22  
23

24 After the government price deregulation in June 2015, the Lp for price-unregulated  
25 medications decreased significantly ( $\beta = -0.013$ ,  $P < 0.05$ ), but no significant  
26 discontinuities in Lp levels or trends were observed for the price-regulated  
27 medications or for their relative change compared to price-unregulated medications.  
28 At 12 months after price deregulation, there was no change in Lp for price regulated  
29 medications and an estimated reduction in the Lp for price-unregulated medications of  
30 0.043 ( $P < 0.05$ ).  
31  
32  
33  
34  
35  
36  
37  
38  
39  
40  
41  
42  
43  
44  
45  
46  
47  
48  
49  
50  
51  
52  
53  
54  
55  
56  
57  
58  
59  
60



Table 2. Results of interrupted time series analyses of the impacts of government price regulation and deregulation on Laspeyres Price Index, monthly average purchase volumes and spending for price-regulated, price-unregulated, and all antineoplastic medications, as well as group differences, 2011-2016

|                                                 | Baseline level | Baseline trend | Post-regulation level change | Post-regulation trend change | Change at 12 months after regulation | Post-deregulation level change | Post-deregulation trend change | Change at 12 months after deregulation |
|-------------------------------------------------|----------------|----------------|------------------------------|------------------------------|--------------------------------------|--------------------------------|--------------------------------|----------------------------------------|
| <b>Lp Price Index</b>                           |                |                |                              |                              |                                      |                                |                                |                                        |
| All medications                                 | 0.993***       | -0.004*        | -0.057***                    | 0.001                        | -0.032                               | -0.005                         | 0.001                          | -0.013                                 |
| Price-regulated medications                     | 0.988***       | -0.004*        | -0.082***                    | 0.001                        | -0.058*                              | -0.003                         | 0.002                          | 0.000                                  |
| Price-unregulated medications                   | 1.006***       | -0.003***      | 0.002                        | 0.001                        | 0.029*                               | -0.013*                        | 0.000                          | -0.043*                                |
| Difference between groups                       | -0.015         | -0.002         | -0.081***                    | 0.001                        | -0.071                               | 0.005                          | 0.002                          | 0.043*                                 |
| <b>Hospital Purchase Volume (Thousand DDD)</b>  |                |                |                              |                              |                                      |                                |                                |                                        |
| All medications                                 | 38.086***      | 0.915          | 1.938                        | -0.525                       | -4.881                               | -0.176                         | -0.311                         | -4.218                                 |
| Price-regulated medications                     | 58.502***      | 1.447          | 3.325                        | -0.862                       | -7.878                               | -1.605                         | -0.527                         | -8.455                                 |
| Price-unregulated medications                   | 10.242***      | 0.193          | 0.004                        | -0.068                       | -0.879                               | 1.798                          | -0.017                         | 1.573                                  |
| Difference between groups                       | 48.252***      | 1.258          | 3.273                        | -0.798                       | -7.097                               | -3.370                         | -0.510                         | -10.003                                |
| <b>Hospital Purchase Spending (Million CNY)</b> |                |                |                              |                              |                                      |                                |                                |                                        |
| All medications                                 | 11.129***      | 0.168          | -0.092                       | -0.083                       | -0.854                               | 0.257                          | -0.063                         | -0.945                                 |
| Price-regulated medications                     | 12.628***      | 0.239          | -0.778                       | -0.178                       | -2.821                               | -0.323                         | -0.013                         | -0.912                                 |
| Price-unregulated medications                   | 9.085***       | 0.073          | 0.832                        | 0.048                        | 1.806                                | 1.052                          | -0.132                         | -0.992                                 |
| Difference between groups                       | 3.614***       | 0.158*         | -1.570**                     | -0.219**                     | -4.508*                              | -1.301*                        | 0.117                          | 0.122                                  |

\*,  $P \leq 0.05$ ; \*\*,  $P \leq 0.01$ ; \*\*\*,  $P \leq 0.001$ ; price-regulated medications: 30 antineoplastic products with price regulation in 2012 and deregulation in 2015; price-unregulated medications: 22 antineoplastic products without price regulation or deregulation; DDD=defined daily doses; CNY = Chinese Yuan (1 CNY = 0.155 US\$ in 2011)

Figure 2. Influence of government price regulation and deregulation on monthly Laspeyres index (Lp) among price-regulated medications (n=30), price-unregulated medications (n = 22), all medications (n = 52), and the difference between regulated and unregulated medications, 2011-2016.

### Influence of Government Pricing Policies on Average Purchase Volumes

The average volume purchased of all 52 antineoplastic medications, measured in DDD, rose from 33,370 DDD in October 2011 to 66,189 DDD in June 2016 (Table 2,

1  
2  
3 Figure 3. There were no statistically significant changes in volume levels or trends  
4 after government price regulation or deregulation in any group.  
5  
6

7 Figure 3. Influence of government price regulation and deregulation on monthly  
8 average purchase volumes among price-regulated medications (n = 30),  
9 price-unregulated medications (n = 22), all medications (n = 52), and the difference  
10 between groups, 2011-2016.  
11  
12

### 13 **Influence of Government Pricing Policies on Hospital Spending**

14 Average hospital spending on all antineoplastic medications rose from 9.86 million  
15 CNY in October 2011 to 17.08 million CNY in June 2016 (Table 2, Figure 4). There  
16 were no statistically significant changes in spending levels or trends after government  
17 price regulation or deregulation in any of the groups. However, the spending on  
18 price-regulated medications decreased and spending on price-unregulated medications  
19 increased after both the regulation and deregulation policies, resulting in significant  
20 level and trend changes in the differences between the two groups. After government  
21 price regulation, the spending difference decreased suddenly ( $\beta = -1.570$ ,  $P < 0.01$ )  
22 and increased somewhat more slowly ( $\beta = -0.219$ ,  $P < 0.01$ ) than the baseline period.  
23 At 12 months after regulation, the absolute spending difference between the groups  
24 was significantly lower ( $-4.508$ ,  $P < 0.05$ ) than would have been expected without the  
25 regulation.  
26  
27

28 After the deregulation policy was implemented, the spending difference dropped  
29 again ( $\beta = -1.301$ ,  $P < 0.01$ ), although followed by an increasing trend ( $\beta = 0.117$ ,  $P <$   
30  $0.05$ ). By the end of follow-up, the relative difference between groups had returned to  
31 nearly the level expected based on trends at the time of the price deregulation policy.  
32  
33  
34  
35  
36

37 Figure 4. Influence of government price regulation and deregulation on monthly  
38 average spending on price-regulated medications (n = 30), price-unregulated  
39 medications (n = 22), all medications (n = 52), and difference between groups,  
40 2011-2016.  
41  
42  
43

### 44 **Discussion**

45 In this study, we investigated the effects of government price regulation and  
46 subsequent deregulation for groups of antineoplastic medications in China. We found  
47 that after government price regulation, the relative price of regulated products fell  
48 more than that of price-unregulated products, and the price of all study medications as  
49 a group decreased significantly compared to the 2011 baseline price; after government  
50 deregulation, the relative price level of price-unregulated medications decreased.  
51 Neither government price regulation nor deregulation significantly affected volumes  
52 purchased or spending on regulated or unregulated medications. However, compared  
53 to price-unregulated medications, spending on price-regulated medications dropped  
54 significantly after price regulation and deregulation.  
55  
56  
57

58 Our results indicate that, as expected, price regulation was effective in decreasing the  
59 price of antineoplastic medications; we have previously shown this effect for  
60

1  
2  
3 digestive system medications,<sup>28</sup> and others have found similar decreases in price for  
4 antihyperlipidemic agents.<sup>29</sup> We did not find the expected price increase after  
5 deregulation for the price-regulated medications. This could be due to the fact that  
6 medication prices in China are also influenced by the provincial tendering system.<sup>30</sup>  
7 Since 2009, the medication tendering process is conducted at the provincial level,  
8 with different assessment criteria, usually a composite score of product quality and  
9 price, to determine the winner.<sup>31</sup> Hence, the tendering mechanism could have  
10 constrained medication price increases after government deregulation.<sup>32</sup> The  
11 provincial tendering process could also explain the price decreases in both groups  
12 observed prior to the national government price regulation. Further, generic entry,  
13 particularly for the older price-regulated cytotoxic medications, may explain why  
14 relative medication prices did not increase after government price deregulation. With  
15 the Chinese government encouraging the development of pharmaceutical enterprises,  
16 more generic medications have come to the market, which might improve the  
17 availability and the affordability of antineoplastic agents.<sup>33</sup>

22 We found no significant changes in purchase volumes or spending on either  
23 price-regulated or price-unregulated medications. When prices of regulated products  
24 decreased in comparison to price-unregulated products following the introduction of  
25 price regulation, we did not observe a compensatory increase in the use of regulated  
26 products, but spending on products in the price-regulated group decreased.  
27 Medication utilization and spending were likely also affected by reimbursement  
28 policies, which restricted the total hospital spending on insurance-listed and  
29 price-regulated products but not on unregulated medications.<sup>34,35</sup>

32 Finally, prescribers may have maintained a preference for the newer, more expensive  
33 medications in the price-unregulated group.<sup>36</sup> Studies in China<sup>37</sup>, Korea<sup>Error! Bookmark</sup>  
34 not defined. and Italy<sup>38</sup>, have shown that volume and medication mix, rather than prices,  
35 determine overall medication expenditures. This may indicate that it is difficult to  
36 manage medication spending increases solely by regulating the prices of some  
37 medications in a therapeutic class. Before 2015, China's Drugs Price Addition Policy  
38 allowed hospitals to charge and keep 15% of the medication sales budget,<sup>39</sup> and  
39 hospitals were incentivized to preferentially prescribe higher priced products.<sup>40</sup> Since  
40 2015, the zero mark-up policy has been gradually introduced for all medications at all  
41 public hospitals, presumably eliminating these incentives to use more and  
42 higher-priced medications.<sup>41</sup> However, prescribing habits developed prior to the zero  
43 mark-up policy may still prevail.

### 50 **Limitations**

51 The study had some limitations. First, we were unable to obtain the full list of  
52 products under government price regulation since 1996, which could lead to selection  
53 bias. However, the 30 price-regulated antineoplastic products studied are likely  
54 representative of all such products. Second, the comparison group of  
55 price-unregulated oncology medications tended to include newer, more expensive  
56 products than the price-regulated group. However, the Lp trends observed at baseline  
57 in the two groups of products were quite similar, suggesting that differential changes  
58  
59  
60

1  
2  
3 observed following the government pricing policies were indicative of true  
4 differences. Third, given our use of aggregated hospital procurement data, we could  
5 not assess factors such as the numbers of patients treated within a given level of  
6 medication spending or volume.  
7  
8  
9

## 10 11 **Conclusion**

12 Compared to unregulated products, the prices of antineoplastic medications decreased  
13 after government price regulation, but did not increase after deregulation. Neither of  
14 the two price regulation policies affected volumes purchased or hospital spending on  
15 all antineoplastic medications. To control the rapid growth of oncology medication  
16 expenditures, more effective measures than price regulation of selected (typically  
17 older) antineoplastic medications need to be taken.  
18  
19  
20

## 21 **Acknowledgements**

22 We thank staff of Chinese Pharmaceutical Association for their support and  
23 cooperation in data access and analysis.  
24  
25

## 26 **Competing Interests:**

27 The authors declared no competing interests.  
28  
29

## 30 **Funding**

31 This study was funded by National Natural Science Foundation of China (Grant  
32 No.71774005). The funders had no role in study design, data collection and analysis,  
33 decision to publish, or preparation of the manuscript. Dr. Wagner received partial  
34 support from the Department of Population Medicine Ebert Award.  
35  
36  
37

## 38 **Ethics approval and consent to participate**

39 The study was considered not human subjects research by the Harvard Pilgrim Health  
40 Care Institutional Review Board.  
41  
42  
43

## 44 **Copyright**

45 The Corresponding Author has the right to grant on behalf of all authors and does  
46 grant on behalf of all authors, a worldwide licence to the Publishers and its licensees  
47 in perpetuity, in all forms, formats and media (whether known now or created in the  
48 future), to i) publish, reproduce, distribute, display and store the Contribution, ii)  
49 translate the Contribution into other languages, create adaptations, reprints, include  
50 within collections and create summaries, extracts and/or, abstracts of the Contribution,  
51 iii) create any other derivative work(s) based on the Contribution, iv) to exploit all  
52 subsidiary rights in the Contribution, v) the inclusion of electronic links from the  
53 Contribution to third party material where-ever it may be located; and, vi) licence any  
54 third party to do any or all of the above.  
55  
56  
57  
58

## 59 **References**

60

- 
- 1 Prasad V, De Jesús K, Mailankody S. The high price of anticancer drugs: origins, implications, barriers, solutions. *Nat Rev Clin Oncol*. 2017 Jun;14(6):381-390.
- 2 Mailankody, S, Prasad, V. Five years of cancer drug approvals: innovation, efficacy, and costs. *JAMA Oncol*. 2015 Jul;1(4):539-40.
- 3 Tefferi A, Kantarjian H, Rajkumar S V, et al. In support of a patient-driven initiative and petition to lower the high price of cancer drugs. *Mayo Clin Proc*. 2015 Aug;90(8):996-1000.
- 4 Ezekiel Emanuel. We can't afford the drugs that could cure cancer. *The Wall Street Journal*. 2018 Sep. <https://www.wsj.com/articles/we-cant-afford-the-drugs-that-could-cure-cancer-1537457740>
- 5 Ess SM, Schneeweiss S, Szucs TD. European healthcare policies for controlling drug expenditure. *Pharmacoeconomics*. 2003;21(2):89-103.
- 6 Stargardt T, Schreyögg J, Busse R. Pricing behaviour of pharmacies after market deregulation for OTC drugs: The case of Germany. *Health Policy*. 2007 Nov;84(1):30-8.
- 7 Puig-Junoy J, López-Valcárcel BG. Launch price for new pharmaceuticals in the heavily regulated and subsidized Spanish market, 1995–2007. *Health Policy*. 2014 Jun;116(2-3):170-81.
- 8 Srinivasan S, Srikrishna T, Phadke A. Drug price control order 2013. As good as a leaky bucket[J]. *Economic and Political Weekly*, 2013, 29(6): 130.
- 9 De Jaegher K, Jegers M. A model of physician behaviour with demand inducement. *J Health Econ*. 2000 Mar;19(2):231-258.
- 10 Danzon PM, Epstein AJ. Effects of regulation on drug launch and pricing in interdependent markets. *Adv Health Econ Health Serv Res*. 2012;23:35-71.
- 11 Kaiser U, Mendez SJ, Rønde T, Ullrich H. Regulation of pharmaceutical price: evidence from a reference pricereform in Denmark. *J Health Econ*. 2014 Jul;36:174-87.
- 12 Wu B, Zhang Q, Qiao X. Evaluation of the China's pharmaceutical price regulations using a macro data during 1997-2008. *J Asia Pacific Econ*. 2015 Apr 3;20(2):290-329.
- 13 Miziara NM, Coutinho DR. Problems in the regulatory policy of the drug market. *Rev Saude Publica*. 2015;49:35.
- 14 National Development and Reform Commission. List of Priced Drugs of the National Development and Reform Commission [Original language: Chinese][OL].[2019-03-25]. [http://www.ndrc.gov.cn/fzgggz/jggl/zcfg/200508/t20050802\\_747962.html](http://www.ndrc.gov.cn/fzgggz/jggl/zcfg/200508/t20050802_747962.html)
- 15 WAN Quan, ZHANG Yu-hui, WANG Xiu-feng. Results and Analysis of China National Health Accounts in 2013[J]. *Chinese Health Economics*.2015,03.
- <sup>16</sup> Hasan Syed Shahzad, Kow Chia Siang, Dawoud Dalia, et al. Pharmaceutical Policy Reforms to Regulate Drug Prices in Asia Pacific Region: The Case of Australia, China, India, Malaysia, New Zealand, and South Korea. *Value in health regional issues*. 2018 Nov; 18-23. DOI:10.1016/j.vhri.2018.08.007
- 17 National Development and Reform Commission. Abolishment of government (guided) pricing for the majority of drugs and push to the drug pricing reform [Original language: Chinese][OL].[2018-12-31] [http://www.sdpc.gov.cn/xwzx/xwfb/201505/t20150505\\_690687.html](http://www.sdpc.gov.cn/xwzx/xwfb/201505/t20150505_690687.html). Accessed Nov 18, 2018.
- 18 Wagner AK, Soumerai SB, Zhang F, et al. Segmented regression analysis of interrupted time series studies in medication use research[J]. *J Clin Pharm Ther*. 2002 Aug, 27(4):299-309.
- 19 Guan X , Tian Y , Ross-Degnan D , et al. Interrupted time-series analysis of the impact of

- 1  
2  
3  
4  
5 generic market entry of antineoplastic products in China[J]. *BMJ Open*, 2018, 8(7).  
6 20 WHO Collaborating Centre for Drug Statistics Methodology. New ATC codes 2019 [OL]. Apr  
7 14, 2019. [https://www.whocc.no/atc\\_ddd\\_index/updates\\_included\\_in\\_the\\_atc\\_ddd\\_index/new\\_atc\\_codes\\_2](https://www.whocc.no/atc_ddd_index/updates_included_in_the_atc_ddd_index/new_atc_codes_2019/)  
8 019/  
9  
10  
11 21 Danzon D P M , Kim J D . International Price Comparisons for Pharmaceuticals[J].  
12 *PharmacoEconomics*, 1998, 14(1 Supplement):115-128.  
13  
14 22 International Monetary Fund. Inter national Financial Statistics[OL]. Apr 20, 2019.  
15 <https://data.worldbank.org.cn/indicator/PA.NUS.FCRF?locations=CN>  
16  
17 23 National Bureau of Statistics of China. Time Series Data -- Monthly Data: Consumer Price  
18 Index[OL]. Jan 14, 2019. <http://www.stats.gov.cn/english/Statisticaldata>  
19  
20 24 Zhang F, Wagner AK, Soumerai SB, et al. Methods for estimating confidence intervals in  
21 interrupted time series analyses of health interventions[J]. *J Clin Epidemiol*. 2009 Feb,  
22 62(2):143-8. doi: 10.1016/j.jclinepi.2008.08.007.  
23  
24 25 J. DURBIN, G. S. WATSON; TESTING FOR SERIAL CORRELATION IN LEAST  
25 SQUARES REGRESSION. I, *Biometrika*, Volume 37, Issue 3-4, 1 December 1950, Pages 409–  
26 428, <https://doi.org/10.1093/biomet/37.3-4.409>.  
27  
28 26 Kutner MH, Nachtsheim CJ, Neter J. *Applied Linear Regression Models* (4th edn),  
29 Irwin/McGraw-Hill: Chicago, 2004.  
30  
31 27 STATA software. StataCorp LLC, College Station, TX, <https://www.stata.com/stata14/>  
32  
33 28 YANG Ming-chun, TIAN Ye, ZOU Wu-jie, et al. Influence of government regulation and  
34 deregulation on the drugs' price: A case study in digestive drug (in Chinese). *Chinese Journal of*  
35 *Health Policy*. 2018 Sep; 11(9): 53-58.  
36  
37 29 Kwon H Y , Hong J M , Godman B , et al. Price cuts and drug spending in South Korea: The  
38 case of antihyperlipidemic agents[J]. *Health Policy*, 2013, 112(3):217-226.  
39  
40 30 Hasan Syed Shahzad, Kow Chia Siang, Dawoud Dalia, et al. Pharmaceutical Policy Reforms to  
41 Regulate Drug Prices in Asia Pacific Region: The Case of Australia, China, India, Malaysia, New  
42 Zealand, and South Korea. *Value in health regional issues*. 2018 Nov; 18-23.  
43 DOI:10.1016/j.vhri.2018.08.007  
44  
45 31 Oortwijn W, Mathijssen J, Banta D. The role of health technology assessment on  
46 pharmaceutical reimbursement in selected middle-income countries. *Health Policy (New York)*  
47 2010;95: 174–84.  
48  
49 32 Liu J, Wang L, Liu C, et al. Impact of price deregulation policy on the affordability of essential  
50 medicines for women's health: a panel data analysis.[J]. *Expert Review of Pharmacoeconomics &*  
51 *Outcomes Research*, 2017:1.  
52  
53 33 Guan X , Tian Y , Ross-Degnan D , et al. Interrupted time-series analysis of the impact of  
54 generic market entry of antineoplastic products in China[J]. *BMJ Open*, 2018, 8(7).  
55  
56 34 Tang S , Tao J , Bekedam H . Controlling Cost Escalation of Healthcare: Making Universal  
57 Health Coverage Sustainable in China[J]. *BMC Public Health*, 2012, 12 Suppl 1(Suppl 1):S8.  
58  
59 35 Huang Y , Liu Y , Yang X , et al. Global budget payment system helps to reduce outpatient  
60 medical expenditure of hypertension in China[J]. *SpringerPlus*, 2016, 5(1):1877.  
36 Zhou Zhongliang, Yanfang Su, Benjamin Campbell, et al. The Financial Impact of the  
'Zero-Markup Policy for Essential Drugs' on Patients in County Hospitals in Western Rural China.

---

1  
2  
3  
4  
5 PLoS One. 2015;10(3). <http://dx.doi.org/10.1371/journal.pone.0121630>

6 37 Meng Q, Cheng G, Silver L, Sun X, Rehnberg C, Tomson G. The impact of China's retail drug  
7 price control policy on hospital expenditures: a case study in two Shandong hospitals. Health  
8 Policy Plan. 2005 May;20(3):185-96.

9  
10 38 Addis A, Magrini N. New approaches to analysing prescription data and to transfer  
11 pharmacoepidemiological and evidence-based reports to prescribers. Pharmacoepidemiol Drug  
12 Saf. 2002 Dec;11(8):721-6.

13  
14 39 Mao Wenhui, Huyen Vu, Zening Xie, et al. Systematic Review on Irrational use of Medicines  
15 in China and Vietnam. PLoS One. 2015;10(3). <http://dx.doi.org/10.1371/journal.pone.0117710>

16 40 Yip W , Hsiao W . China's health care reform: A tentative assessment[J]. China Economic  
17 Review, 2009, 20(4):0-619.

18  
19 41 Hu J , Mossialos E , Kesteloot K , et al. Pharmaceutical pricing and reimbursement in China:  
20 When the whole is less than the sum of its parts[J]. Health Policy, 2016, 120(5):519-534.  
21  
22  
23  
24  
25  
26  
27  
28  
29  
30  
31  
32  
33  
34  
35  
36  
37  
38  
39  
40  
41  
42  
43  
44  
45  
46  
47  
48  
49  
50  
51  
52  
53  
54  
55  
56  
57  
58  
59  
60

1  
2  
3  
4  
5  
6  
7  
8  
9  
10  
11  
12  
13  
14  
15  
16  
17  
18  
19  
20  
21  
22  
23  
24  
25  
26  
27  
28  
29  
30  
31  
32  
33  
34  
35  
36  
37  
38  
39  
40  
41  
42  
43  
44  
45  
46  
47  
48  
49  
50  
51  
52  
53  
54  
55  
56  
57  
58  
59  
60

For peer review only



1  
2  
3  
4  
5  
6  
7  
8  
9  
10  
11  
12  
13  
14  
15  
16  
17  
18  
19  
20  
21  
22  
23  
24  
25  
26  
27  
28  
29  
30  
31  
32  
33  
34  
35  
36  
37  
38  
39  
40  
41  
42  
43  
44  
45  
46  
47  
48  
49  
50  
51  
52  
53  
54  
55  
56  
57  
58  
59  
60

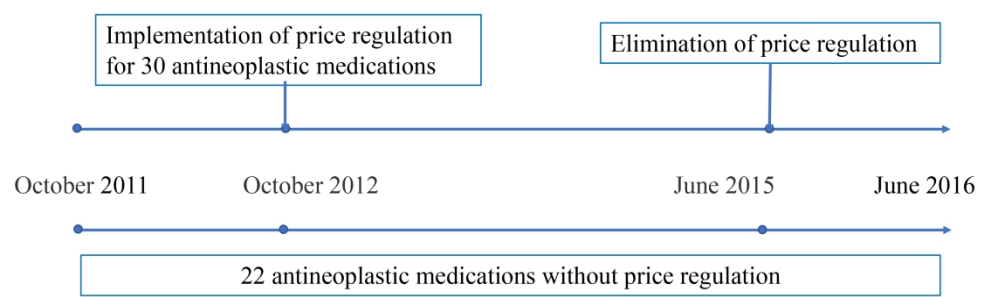

Figure 1. Timeline of price regulation and deregulation of 52 antineoplastic medications

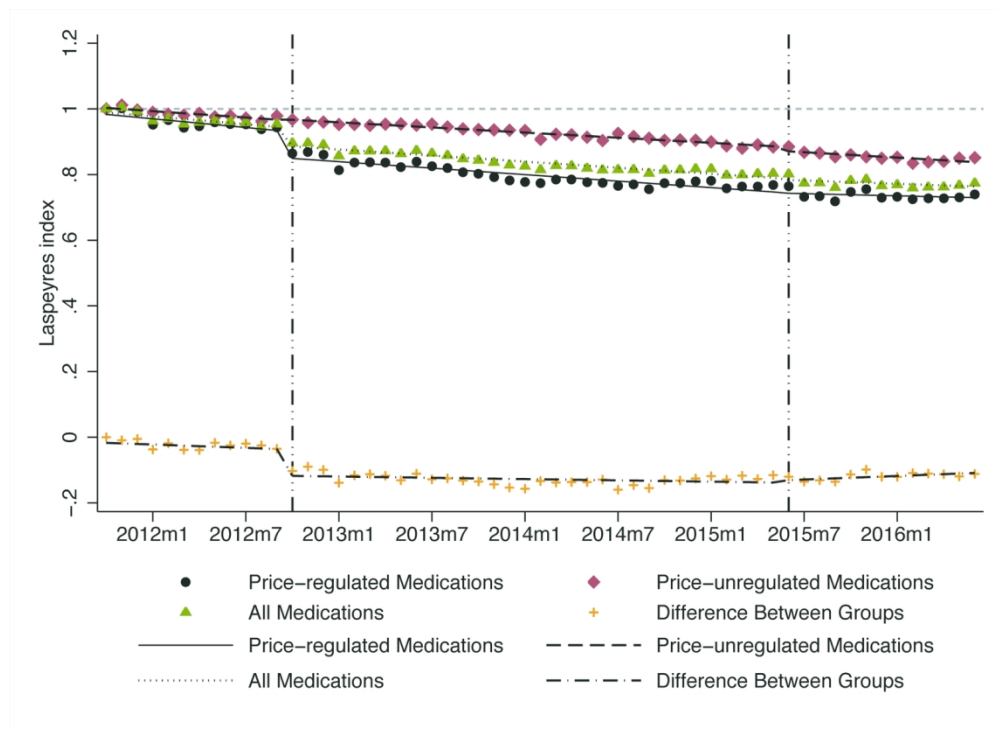

Figure 2. Influence of government price regulation and deregulation on monthly Laspeyres index (Lp) among price-regulated medications (n=30), price-unregulated medications (n = 22), all medications (n = 52), and the difference between regulated and unregulated medications, 2011-2016.

139x101mm (300 x 300 DPI)

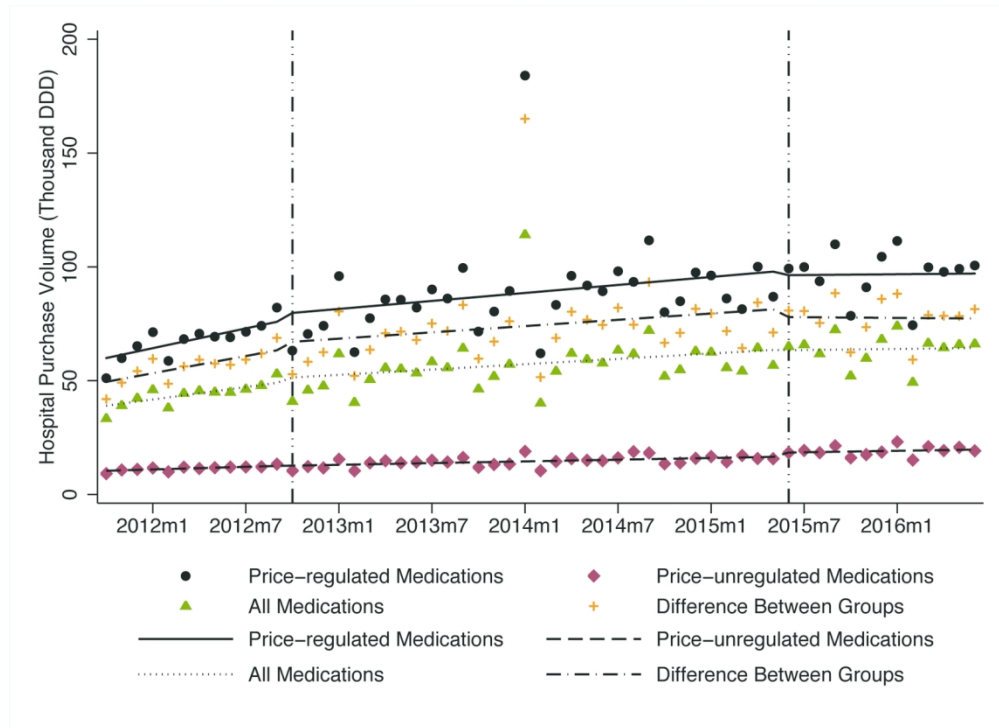

Figure 3. Influence of government price regulation and deregulation on monthly average purchase volumes among price-regulated medications (n = 30), price-unregulated medications (n = 22), all medications (n = 52), and the difference between groups, 2011-2016.

139x101mm (300 x 300 DPI)

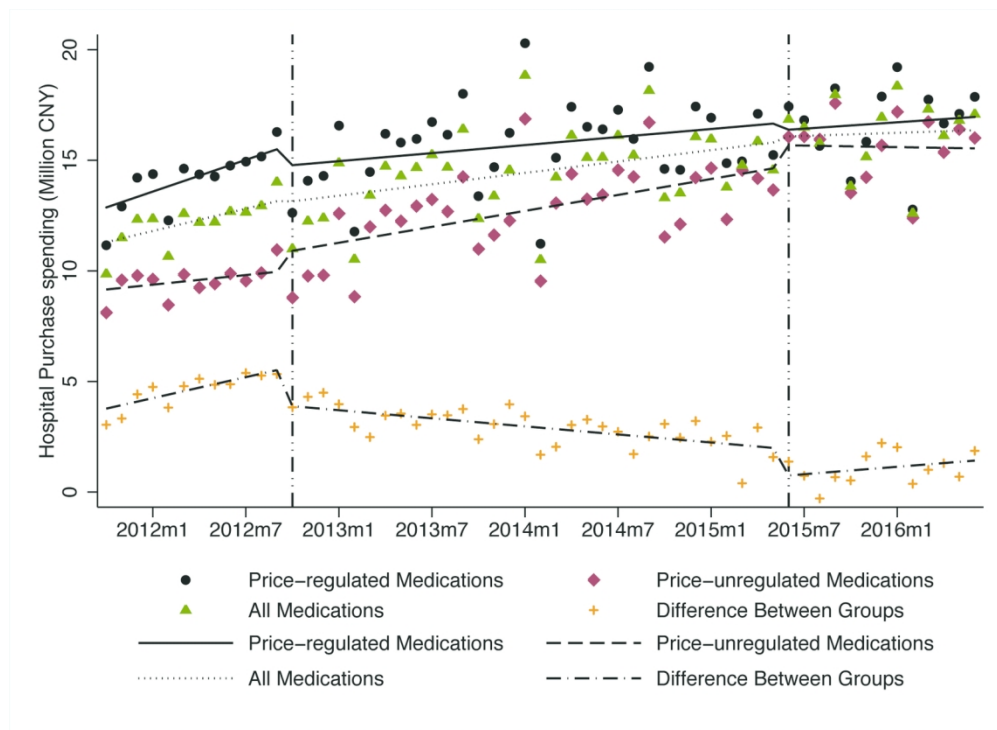

Figure 4. Influence of government price regulation and deregulation on monthly average spending on price-regulated medications (n = 30), price-unregulated medications (n = 22), all medications (n = 52), and difference between groups, 2011-2016.

139x101mm (300 x 300 DPI)

**Appendix A** Antineoplastic medications samples in the price-regulated and price-unregulated groups

| Group                                | Generic name                                                                                                                                                                                                                                                                                                                                                                                                         |
|--------------------------------------|----------------------------------------------------------------------------------------------------------------------------------------------------------------------------------------------------------------------------------------------------------------------------------------------------------------------------------------------------------------------------------------------------------------------|
| Price-regulated medications (n=30)   | aclarubicin; altretamine; asparaginase; bleomycin; busulfan; carboplatin; carmofur; carmustine; dacarbazine; daunorubicin; docetaxel; doxifluridine; epirubicin; etoposide; fludarabine; fluorouracil; gemcitabine; hydroxycamptothecin; lobaplatin; nedaplatin; nimustine; oxaliplatin; semustine; tegafur; tegafur, gimeracil and oteracil porassium; temozolomide; teniposide; topotecan; vindesine; vinorelbine. |
| Price-unregulated medications (n=22) | amsacrine; aminolevulinic acid; arsenite; bortezomib; cetuximab; decitabine; doxorubicin; erlotinib; fluorouracil; fluorouracil combinations; gefitinib; idarubicin; imatinib; raltitrexed; rituximab; sunitinib; sorafenib; thioguanine; nilotinib; trastuzumab; thiotepa; vinblastine.                                                                                                                             |

## STROBE Statement—checklist of items that should be included in reports of observational studies

|                              | Item No | Recommendation                                                                                                                                                                                                                                                                                                                                                                                                                                                                                                                                                                                                                                                                                                                                                    |
|------------------------------|---------|-------------------------------------------------------------------------------------------------------------------------------------------------------------------------------------------------------------------------------------------------------------------------------------------------------------------------------------------------------------------------------------------------------------------------------------------------------------------------------------------------------------------------------------------------------------------------------------------------------------------------------------------------------------------------------------------------------------------------------------------------------------------|
| <b>Title and abstract</b>    | 1       | (a) Indicate the study's design with a commonly used term in the title or the abstract <b>【1】</b><br>(b) Provide in the abstract an informative and balanced summary of what was done and what was found <b>【2】</b>                                                                                                                                                                                                                                                                                                                                                                                                                                                                                                                                               |
| <b>Introduction</b>          |         |                                                                                                                                                                                                                                                                                                                                                                                                                                                                                                                                                                                                                                                                                                                                                                   |
| Background/rationale         | 2       | Explain the scientific background and rationale for the investigation being reported <b>【3】</b>                                                                                                                                                                                                                                                                                                                                                                                                                                                                                                                                                                                                                                                                   |
| Objectives                   | 3       | State specific objectives, including any prespecified hypotheses <b>【4】</b>                                                                                                                                                                                                                                                                                                                                                                                                                                                                                                                                                                                                                                                                                       |
| <b>Methods</b>               |         |                                                                                                                                                                                                                                                                                                                                                                                                                                                                                                                                                                                                                                                                                                                                                                   |
| Study design                 | 4       | Present key elements of study design early in the paper <b>【4】</b>                                                                                                                                                                                                                                                                                                                                                                                                                                                                                                                                                                                                                                                                                                |
| Setting                      | 5       | Describe the setting, locations, and relevant dates, including periods of recruitment, exposure, follow-up, and data collection <b>【4】</b>                                                                                                                                                                                                                                                                                                                                                                                                                                                                                                                                                                                                                        |
| Participants                 | 6       | (a) <i>Cohort study</i> —Give the eligibility criteria, and the sources and methods of selection of participants. Describe methods of follow-up <b>【N/A】</b><br><i>Case-control study</i> —Give the eligibility criteria, and the sources and methods of case ascertainment and control selection. Give the rationale for the choice of cases and controls <b>【N/A】</b><br><i>Cross-sectional study</i> —Give the eligibility criteria, and the sources and methods of selection of participants <b>【N/A】</b><br>(b) <i>Cohort study</i> —For matched studies, give matching criteria and number of exposed and unexposed <b>【N/A】</b><br><i>Case-control study</i> —For matched studies, give matching criteria and the number of controls per case <b>【N/A】</b> |
| Variables                    | 7       | Clearly define all outcomes, exposures, predictors, potential confounders, and effect modifiers. Give diagnostic criteria, if applicable <b>【5】</b>                                                                                                                                                                                                                                                                                                                                                                                                                                                                                                                                                                                                               |
| Data sources/<br>measurement | 8*      | For each variable of interest, give sources of data and details of methods of assessment (measurement). Describe comparability of assessment methods if there is more than one group <b>【4】</b>                                                                                                                                                                                                                                                                                                                                                                                                                                                                                                                                                                   |
| Bias                         | 9       | Describe any efforts to address potential sources of bias <b>【N/A】</b>                                                                                                                                                                                                                                                                                                                                                                                                                                                                                                                                                                                                                                                                                            |
| Study size                   | 10      | Explain how the study size was arrived at <b>【N/A】</b>                                                                                                                                                                                                                                                                                                                                                                                                                                                                                                                                                                                                                                                                                                            |
| Quantitative variables       | 11      | Explain how quantitative variables were handled in the analyses. If applicable, describe which groupings were chosen and why <b>【5】</b>                                                                                                                                                                                                                                                                                                                                                                                                                                                                                                                                                                                                                           |
| Statistical methods          | 12      | (a) Describe all statistical methods, including those used to control for confounding <b>【5】</b><br>(b) Describe any methods used to examine subgroups and interactions <b>【5】</b><br>(c) Explain how missing data were addressed <b>【5】</b><br>(d) <i>Cohort study</i> —If applicable, explain how loss to follow-up was addressed <b>【N/A】</b><br><i>Case-control study</i> —If applicable, explain how matching of cases and controls was addressed <b>【N/A】</b><br><i>Cross-sectional study</i> —If applicable, describe analytical methods taking account of sampling strategy <b>【N/A】</b><br>(e) Describe any sensitivity analyses <b>【N/A】</b>                                                                                                            |

1  
2  
3  
4  
5  
6  
7  
8  
9  
10  
11  
12  
13  
14  
15  
16  
17  
18  
19  
20  
21  
22  
23  
24  
25  
26  
27  
28  
29  
30  
31  
32  
33  
34  
35  
36  
37  
38  
39  
40  
41  
42  
43  
44  
45  
46  
47  
48  
49  
50  
51  
52  
53  
54  
55  
56  
57  
58  
59  
60

Continued on next page

For peer review only

| <b>Results</b>           |     |                                                                                                                                                                                                                                                                                                                                                                                                                                                        |
|--------------------------|-----|--------------------------------------------------------------------------------------------------------------------------------------------------------------------------------------------------------------------------------------------------------------------------------------------------------------------------------------------------------------------------------------------------------------------------------------------------------|
| Participants             | 13* | (a) Report numbers of individuals at each stage of study—eg numbers potentially eligible, examined for eligibility, confirmed eligible, included in the study, completing follow-up, and analysed <b>【N/A】</b><br>(b) Give reasons for non-participation at each stage <b>【N/A】</b><br>(c) Consider use of a flow diagram <b>【N/A】</b>                                                                                                                 |
| Descriptive data         | 14* | (a) Give characteristics of study participants (eg demographic, clinical, social) and information on exposures and potential confounders <b>【N/A】</b><br>(b) Indicate number of participants with missing data for each variable of interest <b>【N/A】</b><br>(c) <i>Cohort study</i> —Summarise follow-up time (eg, average and total amount) <b>【N/A】</b>                                                                                             |
| Outcome data             | 15* | <i>Cohort study</i> —Report numbers of outcome events or summary measures over time <b>【N/A】</b><br><i>Case-control study</i> —Report numbers in each exposure category, or summary measures of exposure <b>【N/A】</b><br><i>Cross-sectional study</i> —Report numbers of outcome events or summary measures <b>【N/A】</b>                                                                                                                               |
| Main results             | 16  | (a) Give unadjusted estimates and, if applicable, confounder-adjusted estimates and their precision (eg, 95% confidence interval). Make clear which confounders were adjusted for and why they were included <b>【6-10】</b><br>(b) Report category boundaries when continuous variables were categorized <b>【6-10】</b><br>(c) If relevant, consider translating estimates of relative risk into absolute risk for a meaningful time period <b>【N/A】</b> |
| Other analyses           | 17  | Report other analyses done—eg analyses of subgroups and interactions, and sensitivity analyses <b>【6-10】</b>                                                                                                                                                                                                                                                                                                                                           |
| <b>Discussion</b>        |     |                                                                                                                                                                                                                                                                                                                                                                                                                                                        |
| Key results              | 18  | Summarise key results with reference to study objectives <b>【10-11】</b>                                                                                                                                                                                                                                                                                                                                                                                |
| Limitations              | 19  | Discuss limitations of the study, taking into account sources of potential bias or imprecision. Discuss both direction and magnitude of any potential bias <b>【11】</b>                                                                                                                                                                                                                                                                                 |
| Interpretation           | 20  | Give a cautious overall interpretation of results considering objectives, limitations, multiplicity of analyses, results from similar studies, and other relevant evidence <b>【11】</b>                                                                                                                                                                                                                                                                 |
| Generalisability         | 21  | Discuss the generalisability (external validity) of the study results <b>【11】</b>                                                                                                                                                                                                                                                                                                                                                                      |
| <b>Other information</b> |     |                                                                                                                                                                                                                                                                                                                                                                                                                                                        |
| Funding                  | 22  | Give the source of funding and the role of the funders for the present study and, if applicable, for the original study on which the present article is based <b>【12】</b>                                                                                                                                                                                                                                                                              |

\*Give information separately for cases and controls in case-control studies and, if applicable, for exposed and unexposed groups in cohort and cross-sectional studies.

**Note:** An Explanation and Elaboration article discusses each checklist item and gives methodological background and published examples of transparent reporting. The STROBE checklist is best used in conjunction with this article (freely available on the Web sites of PLoS Medicine at <http://www.plosmedicine.org/>, Annals of Internal Medicine at <http://www.annals.org/>, and Epidemiology at <http://www.epidem.com/>). Information on the STROBE Initiative is available at [www.strobe-statement.org](http://www.strobe-statement.org).



# BMJ Open

## Influence of Government Price Regulation and Deregulation on the Price of Antineoplastic Medications in China: A Controlled Interrupted Time Series Study

|                                 |                                                                                                                                                                                                                                                                                                                                                                                                                                                                                                                                                                                                                                                                                                                                                                                                                                                                                                                                                                                            |
|---------------------------------|--------------------------------------------------------------------------------------------------------------------------------------------------------------------------------------------------------------------------------------------------------------------------------------------------------------------------------------------------------------------------------------------------------------------------------------------------------------------------------------------------------------------------------------------------------------------------------------------------------------------------------------------------------------------------------------------------------------------------------------------------------------------------------------------------------------------------------------------------------------------------------------------------------------------------------------------------------------------------------------------|
| Journal:                        | <i>BMJ Open</i>                                                                                                                                                                                                                                                                                                                                                                                                                                                                                                                                                                                                                                                                                                                                                                                                                                                                                                                                                                            |
| Manuscript ID                   | bmjopen-2019-031658.R1                                                                                                                                                                                                                                                                                                                                                                                                                                                                                                                                                                                                                                                                                                                                                                                                                                                                                                                                                                     |
| Article Type:                   | Original research                                                                                                                                                                                                                                                                                                                                                                                                                                                                                                                                                                                                                                                                                                                                                                                                                                                                                                                                                                          |
| Date Submitted by the Author:   | 02-Oct-2019                                                                                                                                                                                                                                                                                                                                                                                                                                                                                                                                                                                                                                                                                                                                                                                                                                                                                                                                                                                |
| Complete List of Authors:       | Guan, Xiaodong; School of Pharmceutial Sciences, Peking University, Department of Pharmacy Adiministration and Clinical Pharmacy; Harvard Medical School and Harvard Pilgrim Health Care Institute, Department of Population Medicine<br>Wushouer, Haishaerjiang; Chinese Academy of Engineering, Center for Strategic Studies; Tsinghua University, School of Medicine<br>Yang, Mingchun; School of Pharmceutial Sciences, Peking University, Department of Pharmacy Adiministration and Clinical Pharmacy<br>Han, Sheng; Peking University, International Research Center for Medicinal Administration<br>Shi, Luwen; School of Pharmceutial Sciences, Peking University, Department of Pharmacy Adiministration and Clinical Pharmacy<br>Ross-Degnan, Dennis; Harvard Medical School and Harvard Pilgrim Health Care Institute, Department of Population Medicine<br>Wagner, Anita; Harvard Medical School and Harvard Pilgrim Health Care Institute, Department of Population Medicine |
| <b>Primary Subject Heading</b>: | Health policy                                                                                                                                                                                                                                                                                                                                                                                                                                                                                                                                                                                                                                                                                                                                                                                                                                                                                                                                                                              |
| Secondary Subject Heading:      | Health policy                                                                                                                                                                                                                                                                                                                                                                                                                                                                                                                                                                                                                                                                                                                                                                                                                                                                                                                                                                              |
| Keywords:                       | Price Regulation, Deregulation, Laspeyres index, Antineoplastic Medications                                                                                                                                                                                                                                                                                                                                                                                                                                                                                                                                                                                                                                                                                                                                                                                                                                                                                                                |
|                                 |                                                                                                                                                                                                                                                                                                                                                                                                                                                                                                                                                                                                                                                                                                                                                                                                                                                                                                                                                                                            |

SCHOLARONE™  
Manuscripts

1  
2  
3  
4 **Influence of Government Price Regulation and Deregulation on the Price of**  
5 **Antineoplastic Medications in China: A Controlled Interrupted Time Series**  
6  
7 **Study**  
8

9 Xiaodong Guan <sup>1,2,3</sup>, Haishaerjiang Wushouer <sup>2,4,5</sup>, Mingchun Yang <sup>1</sup>, Sheng Han<sup>2</sup>,  
10 Luwen Shi <sup>1,2\*</sup>, Dennis Ross-Degnan <sup>3</sup>, Anita Katharina Wagner <sup>3</sup>  
11  
12  
13  
14

15 1. Department of Pharmacy Administration and Clinical Pharmacy, School of  
16 Pharmaceutical Sciences, Peking University, Beijing, China.  
17

18 2. International Research Center for Medicinal Administration, Peking University,  
19 Beijing, China.  
20

21 3. Department of Population Medicine, Harvard Medical School and Harvard Pilgrim  
22 Health Care Institute, Boston, Massachusetts, USA.  
23

24 4. Center for Strategic Studies, Chinese Academy of Engineering, Beijing, China.  
25

26 5. School of Medicine, Tsinghua University, Beijing, China.  
27  
28  
29  
30  
31

32 Corresponding Author:  
33

34 Name: Luwen SHI  
35

36 Title: Professor  
37

38 Address: 38 Xueyuan Road, Beijing, China, 100191  
39

40 Phone: +86 10 82805019  
41

42 Fax number: +86 10 82805019  
43

44 Email: [shiluwen211@163.com](mailto:shiluwen211@163.com)  
45  
46  
47  
48  
49

50 Word count: 3325  
51  
52  
53

54 Contributors: Luwen Shi, Xiaodong Guan, Dennis Ross-Degnan and Anita Katharina  
55 Wagner conceptualised and designed the study. Sheng Han and Mingchun Yang  
56 contributed to analysis of the data. Xiaodong Guan, Haishaerjiang Wushouer and  
57 Mingchun Yang conducted the final analyses. Xiaodong Guan and Haishaerjiang  
58  
59  
60

1  
2  
3 Wushouer drafted the initial manuscript. All authors contributed to the critical revision  
4 of the manuscript and approved the final version.  
5  
6  
7  
8

9 **Keywords:** Price Regulation, Deregulation, Laspeyres index, Antineoplastic  
10 Medications  
11  
12  
13  
14  
15  
16  
17  
18  
19  
20  
21  
22  
23  
24  
25  
26  
27  
28  
29  
30  
31  
32  
33  
34  
35  
36  
37  
38  
39  
40  
41  
42  
43  
44  
45  
46  
47  
48  
49  
50  
51  
52  
53  
54  
55  
56  
57  
58  
59  
60

For peer review only

## 1 ABSTRACT

2 Background: In October 2012, the Chinese government established maximum retail  
3 prices for specific products, including 30 antineoplastic medications. Three years later,  
4 in June 2015, the government abolished price regulation for most medications,  
5 including all antineoplastic medications. This study examined the impacts of regulation  
6 and subsequent deregulation of prices of antineoplastic medications in China.

7 Methods: Using hospital procurement data and an interrupted time series (ITS) with  
8 comparison series design, we examined the impacts of the policy changes on relative  
9 purchase prices (Laspeyeres price index) and volumes, and spending on 52  
10 antineoplastic medications in 699 hospitals. We identified three policy periods: prior to  
11 the initial price regulation (October 2011 to September 2012); during price regulation  
12 (October 2012 to June 2015); and after price deregulation (July 2015 to June 2016).

13 Results: During government price regulation, compared to price-unregulated cancer  
14 medications (n = 22 mostly newer targeted products), the relative price of price-  
15 regulated medications (n = 30 mostly chemotherapeutic products) decreased  
16 significantly ( $\beta = -0.081$ ,  $P < 0.001$ ). After the government price deregulation, no  
17 significant price change occurred. Neither government price regulation nor  
18 deregulation significantly impacted average volumes of or average spending on all  
19 antineoplastic medications immediately after the policy changes or in the longer term  
20 ( $P > 0.05$ ).

21 Conclusion: Compared to unregulated antineoplastic, the prices of regulated  
22 antineoplastic medications decreased after setting price caps, but did not increase after  
23 deregulation. To control the rapid growth of oncology medication expenditures, more  
24 effective measures than price regulation through price caps for traditional  
25 chemotherapy are needed.

### 26 27 **Strengths and limitations**

- 28 ● An interrupted time series (ITS) design, with two breakpoints was adopted to assess  
29 changes in price, volume of use, and spending following implementation of two  
30 price policies.
- 31 ● The study adds value to the understanding of the effect of government regulation  
32 and deregulation on the prices of cancer medications.
- 33 ● We were unable to obtain the full list of products under government price  
34 regulation since 1996, which could lead to selection bias.

- 1  
2  
3  
4 35 ● Given our use of aggregated hospital procurement data, we could not assess factors  
5 36 such as numbers of patients treated or appropriateness of use at a given level of  
6 37 medication spending or volume.  
7  
8  
9 38

10  
11  
12  
13  
14  
15  
16  
17  
18  
19  
20  
21  
22  
23  
24  
25  
26  
27  
28  
29  
30  
31  
32  
33  
34  
35  
36  
37  
38  
39  
40  
41  
42  
43  
44  
45  
46  
47  
48  
49  
50  
51  
52  
53  
54  
55  
56  
57  
58  
59  
60

For peer review only

## 39 **Introduction**

40 Cancer medications account for the highest proportion of pharmaceutical spending  
41 among all therapeutic classes.<sup>1</sup> Rising cancer medication prices contribute to the rapid  
42 rise of medical and pharmaceutical expenditures, drawing criticism from leading  
43 academics, patients, cancer specialists, and policy experts.<sup>2,3,4</sup> In response, policy  
44 makers are implementing a variety of regulatory controls.<sup>5</sup>

45 International studies of the roles of regulation and competition in the pharmaceutical  
46 market have addressed various challenges and benefits of government price control  
47 policies, and results and perspectives are mixed.<sup>6,7</sup> Srinivasan (2013) argues that the  
48 pharmaceutical market requires government regulation because of market failures,<sup>8</sup>  
49 such as information asymmetry and perverse incentives which affect pricing,  
50 professional behavior and competition.<sup>9</sup> Studies in a number of settings have found  
51 that direct price-cap government regulation can be effective in reducing medication  
52 prices.<sup>10,11,12</sup> However, researchers have reported favorable effects of generic market  
53 competition on medication prices<sup>13,14</sup> and argued that the high price of medications is  
54 due in part to interfering government controls.<sup>15</sup> In critics' eyes, government regulation,  
55 such as price caps, constitutes a barrier to dynamic competition in the generic market,  
56 resulting in consumers not being able benefit fully from competition on pharmaceutical  
57 prices.<sup>16,17,18</sup>

58 In China, the government has introduced complex medication price control policies to  
59 decrease medication prices. First, after the Urban Employee Basic Medical Insurance  
60 (UEBMI) was established in 1998, the National Development and Reform Commission  
61 (NDRC) was required to set a highest retail price using a cost-plus calculation for each  
62 medication listed in the National Reimbursement Drug List (NRDL).<sup>19,20</sup> And rules for  
63 price difference and price ratio of medicines were applied to convert a generic price  
64 into different prices for medicines with different dosage forms or specifications.<sup>21</sup>  
65 From 1998 to 2015, the NDRC used price caps to reduce drug prices for 31 times,  
66 involving 1029 medicines (not including traditional Chinese drugs) in terms of generic  
67 name.<sup>22,23</sup> In addition, because medication expenditures accounted for 40.4% of total  
68 health expenditures (in 2009) and almost 70% of medication sales were in hospitals (in  
69 2013),<sup>24,25</sup> since 2010, provinces had to conduct a centralized bidding and tendering  
70 process to procure all hospital medications, with the intent to decrease prices and curb  
71 medication expenditures.<sup>26</sup>

72 In October 2012, the NDRC established maximum retail prices for specific products  
73 listed in the 2009 National Reimbursement List, including 36 antineoplastic  
74 medications.<sup>27</sup> Following the central government's requirement to limit regulatory  
75 controls in economic management, China loosened administrative controls over

1  
2  
3 76 medication prices and the NDRC formally abolished price ceiling policies in 2015.<sup>28</sup>  
4 77 Improvement in access to price-regulated medications after the 2012 price regulation  
5 78 and price increases after the 2015 government price deregulation were expected.  
6 79 However, the effects of government price regulation and deregulation on anticancer  
7 80 medications is unknown. We studied impacts of NDRC price regulation and  
8 81 deregulation on the relative prices and sales volumes and spending on antineoplastic  
9 82 medications in China.

10  
11  
12  
13  
14  
15  
16

## 17 84 **Methods**

### 18 85 **Study design**

19  
20 86 We used the strongest quasi-experimental design, an interrupted time series (ITS)  
21 87 design,<sup>29</sup> with two breakpoints to assess changes following implementation of two  
22 88 price policies. The first breakpoint, October 2012, served to assess the effects of the  
23 89 government retail price regulation that was announced on September 14<sup>th</sup>, 2012 and  
24 90 came into effect on October 8<sup>th</sup>, 2012. The second breakpoint, June 2015, served to  
25 91 assess the effects of government retail price deregulation that was announced on May  
26 92 4<sup>th</sup>, 2015 and came into effect on June 1<sup>st</sup>, 2015. To compare the effects of each policy  
27 93 intervention, we conducted analyses of medication groups for which 2012 price caps  
28 94 were and were not applied. The intervention group of medications had retail price caps  
29 95 as of October 2012 and the control group was without price caps throughout the study  
30 96 period. We use the term ‘price-regulated medications’ for the medicines that were under  
31 97 price regulation during the intervention period; these products are no longer price  
32 98 regulated. (Figure 1) We hypothesized that the impacts of price regulation or  
33 99 deregulation on purchase prices, volumes, and spending would differ between the two  
34 100 groups.

35  
36  
37  
38  
39  
40  
41  
42  
43  
44  
45  
46  
47

48  
49  
50

103 Figure 1. Timeline of price regulation and deregulation of 52 antineoplastic  
104 medications

### 51 105 **Data source**

52  
53 106 Data on products purchased between October 2011 and June 2016 were extracted from  
54 107 the observational Chinese Medical Economic Information (CMEI) database of public  
55 108 hospital medication purchasing records.<sup>30</sup> We conducted a search of all antineoplastic  
56 109 medications in the database by ATC code (L01).<sup>31</sup> We excluded those antineoplastic  
57 110 medications with missing data and included antineoplastic medications regulated in

1  
2  
3  
4 111 October 2012 as intervention group and antineoplastic medications not listed in the  
5 112 NDRL and thus not subject to price caps during the study period as control group. We  
6 113 extracted procurement data for 52 antineoplastic medications (30 medications with  
7 114 retail price caps from October 2012 to June 2015 and 22 medications without any price  
8 115 caps from the year before to the year after the price poly changes, between October  
9 116 2011 and June 2016, Supplement 1A and 1B) from 699 public hospitals, including 476  
10 117 tertiary hospitals, 217 secondary hospitals and 6 primary health facilities in 28  
11 118 provinces. Data elements extracted for each product comprised the International  
12 119 Nonproprietary Name (INN), dosage form, strength, manufacturer, medication  
13 120 purchase price per package, monthly purchasing volumes and monthly hospital  
14 121 spending.

## 122 **Outcome measures**

123 The primary outcome was the  $L_p$ , an index formula used in price statistics for  
124 measuring the price development over time of baskets of goods and services consumed  
125 in the base period 0 by weighting prices by the volume purchased in period 0.<sup>32</sup> In this  
126 study, the  $L_p$  was calculated based on equation (1):

$$127 L_{pt} = \frac{\sum P_{ijt} Q_{ij0}}{\sum P_{ij0} Q_{ij0}} \quad (1)$$

128 where  $P_{ijt}$  stands for price of medication  $i$  with strength  $j$  in periods  $t$ , and  $Q_{ij0}$  stands  
129 for the volume for this medication used in period 0;  $P$  and  $Q$  were calculated in terms  
130 of Defined Daily Doses (DDD). The DDD used in this paper were the recommended  
131 daily amounts of each study medication based on dosage regimens recommended in the  
132 manufacturers' instructions, as approved by China Food and Drug Administration  
133 (CFDA). A  $L_p$  value of less than 1 means that the price of the basket of goods in a given  
134 period of time was lower than that in period 0, and an  $L_p$  greater 1 means that the basket  
135 price has increased from baseline. The currency of price and spending was Chinese  
136 Yuan (CNY).<sup>33</sup>

137 Other outcomes of interest were average monthly purchasing volumes (number of DDD)  
138 of and average monthly hospital spending (CNY) on the 30 price-regulated, 22 price-  
139 unregulated and all 52 pharmaceuticals. All price and spending data were adjusted to  
140 October 2011 prices using the consumer price index for health care.<sup>34</sup>

## 141 **Statistical Analysis**

142 We assessed outcomes over time for price-regulated medications (intervention group),  
143 price-unregulated medications (control group) and all 52 products together. We also  
144 modeled intervention effects using the monthly differences in the outcomes in the two  
145 groups to estimate the relative impacts of regulation and deregulation among the



1  
2  
3  
4 146 regulated products, controlling for any other externalities that may have affected  
5 147 outcomes in the control group products.

6  
7 148 ITS models were used to estimate levels and trends of the outcomes in the pre-  
8 149 intervention periods and changes in levels and trends in the post-intervention periods.  
9 150 ITS models with two interruption points were formulated to detect the effect on Lp,  
10 151 monthly average purchasing volumes and spending, as in equation (2):

11  
12  
13  
14 152

$$153 Y_{it} = \beta_0 + \beta_1 \times time_t + \beta_2 \times regulation + \beta_3 \times reg\_trend + \beta_4 \\ 154 \times deregulation + \beta_5 \times der\_trend + \varepsilon_{it} \quad (2)$$

15  
16  
17  
18  
19 155

20  
21 156 We used  $\beta_0$  to estimate the baseline purchasing volume and spending;  $\beta_1$  estimated  
22 157 the pre-regulation trend;  $\beta_2$  estimated the change in level after the regulation policy;  
23 158  $\beta_3$  estimated the change in trend after the regulation policy;  $\beta_4$  estimated the change  
24 159 in level after the deregulation policy;  $\beta_5$  estimated the change in trend after the  
25 160 deregulation policy. Key coefficients were  $\beta_2$ ,  $\beta_3$ ,  $\beta_4$  and  $\beta_5$ . To estimate the  
26 161 combined level and trend impacts of the policy changes, we calculated the absolute  
27 162 difference in  $Y_{it}$  at 12 months after regulation and after deregulation, respectively,  
28 163 compared to the counterfactual, that is, the estimated  $Y_{it}$  had the intervention not  
29 164 happened.<sup>35</sup>

30  
31  
32  
33  
34  
35 165 We performed the Durbin-Watson test to estimate level of residual autocorrelations<sup>36</sup>  
36 166 and used the Cochrane-Orcutt auto-regression procedure to correct for first order  
37 167 serially correlated errors when needed.<sup>37</sup> All analyses were performed using Stata  
38 168 14.0.<sup>38</sup>

## 39 169 **Patient and public involvement**

40  
41  
42  
43  
44  
45 170 There were no patients and public involved in in the design or planning of the study.

46  
47  
48 171

49  
50 172

## 51 173 **Study Results**

### 52 174 **Influence of Government Pricing Policies on Relative Purchase Prices**

53  
54  
55 175 The Lp declined over time in both intervention and control medication groups (that is,  
56 176 prices decreased relative to baseline) (Table 1, Figure 2). After government price  
57 177 regulation in October 2012, the Lp for price-regulated medications dropped suddenly  
58 178 (level change  $\beta = -0.082$ ,  $P < 0.001$ ), with significant declines in Lp relative to price-

1  
2  
3  
4 179 unregulated medications ( $\beta = -0.081$ ,  $P < 0.001$ ). At 12 months after the regulation,  
5 180 there was an estimated reduction in the Lp for price-regulated medications of 0.058 ( $P$   
6 181  $< 0.05$ ) and an estimated increase in the Lp for price-unregulated of 0.029 ( $P < 0.05$ ).

8  
9 182 After the government price deregulation in June 2015, the Lp for price-unregulated  
10 183 medications decreased significantly (level change  $\beta = -0.013$ ,  $P < 0.05$ ), but no  
11 184 significant discontinuities in Lp levels or trends were observed for the price-regulated  
12 185 medications or for the relative change compared to price-unregulated medications. At  
13 186 12 months after price deregulation, there was no change in Lp for price regulated  
14 187 medications and an estimated reduction in the Lp for price-unregulated medications of  
15 188 0.043 ( $P < 0.05$ ).

16  
17  
18  
19  
20 189

21  
22 190  
23  
24  
25  
26  
27  
28  
29  
30  
31  
32  
33  
34  
35  
36  
37  
38  
39  
40  
41  
42  
43  
44  
45  
46  
47  
48  
49  
50  
51  
52  
53  
54  
55  
56  
57  
58  
59  
60

191 Table 1. Results of interrupted time series analyses of the impacts of government price  
 192 regulation and deregulation on Laspeyres Price Index, monthly average purchase  
 193 volumes and spending for price-regulated, price-unregulated, and all antineoplastic  
 194 medications, as well as group differences, 2011-2016

|                                                 | Baseline level | Baseline trend | Post-regulation level change | Post-regulation trend change | Change at 12 months after regulation | Post-deregulation level change | Post-deregulation trend change | Change at 12 months after deregulation |
|-------------------------------------------------|----------------|----------------|------------------------------|------------------------------|--------------------------------------|--------------------------------|--------------------------------|----------------------------------------|
| <b>Lp Price Index</b>                           |                |                |                              |                              |                                      |                                |                                |                                        |
| All medications                                 | 0.993***       | -0.004*        | -0.057***                    | 0.001                        | -0.032                               | -0.005                         | 0.001                          | -0.013                                 |
| Price-regulated medications                     | 0.988***       | -0.004*        | -0.082***                    | 0.001                        | -0.058*                              | -0.003                         | 0.002                          | 0.000                                  |
| Price-unregulated medications                   | 1.006***       | -0.003***      | 0.002                        | 0.001                        | 0.029*                               | -0.013*                        | 0.000                          | -0.043*                                |
| Difference between groups                       | -0.015         | -0.002         | -0.081***                    | 0.001                        | -0.071                               | 0.005                          | 0.002                          | 0.043*                                 |
| <b>Hospital Purchase Volume (Thousand DDD)</b>  |                |                |                              |                              |                                      |                                |                                |                                        |
| All medications                                 | 38.086***      | 0.915          | 1.938                        | -0.525                       | -4.881                               | -0.176                         | -0.311                         | -4.218                                 |
| Price-regulated medications                     | 58.502***      | 1.447          | 3.325                        | -0.862                       | -7.878                               | -1.605                         | -0.527                         | -8.455                                 |
| Price-unregulated medications                   | 10.242***      | 0.193          | 0.004                        | -0.068                       | -0.879                               | 1.798                          | -0.017                         | 1.573                                  |
| Difference between groups                       | 48.252***      | 1.258          | 3.273                        | -0.798                       | -7.097                               | -3.370                         | -0.510                         | -10.003                                |
| <b>Hospital Purchase Spending (Million CNY)</b> |                |                |                              |                              |                                      |                                |                                |                                        |
| All medications                                 | 11.129***      | 0.168          | -0.092                       | -0.083                       | -0.854                               | 0.257                          | -0.063                         | -0.945                                 |
| Price-regulated medications                     | 12.628***      | 0.239          | -0.778                       | -0.178                       | -2.821                               | -0.323                         | -0.013                         | -0.912                                 |
| Price-unregulated medications                   | 9.085***       | 0.073          | 0.832                        | 0.048                        | 1.806                                | 1.052                          | -0.132                         | -0.992                                 |
| Difference between groups                       | 3.614***       | 0.158*         | -1.570**                     | -0.219**                     | -4.508*                              | -1.301*                        | 0.117                          | 0.122                                  |

1  
2  
3  
4 195 \*,  $P \leq 0.05$ ; \*\*,  $P \leq 0.01$ ; \*\*\*,  $P \leq 0.001$ ; price-regulated medications: 30 antineoplastic products with  
5 196 price regulation in 2012 and deregulation in 2015; price-unregulated medications: 22 antineoplastic  
6 197 products without price regulation or deregulation; DDD=defined daily doses; CNY = Chinese Yuan (1  
7 198 CNY = 0.155 US\$ in 2011)

9  
10 199

11  
12 200

13  
14 201 Figure 2. Influence of government price regulation and deregulation on monthly  
15 202 Laspeyres index (Lp) among price-regulated medications (n=30), price-unregulated  
16 203 medications (n = 22), all medications (n = 52), and the difference between regulated  
17 204 and unregulated medications, 2011-2016.

18  
19  
20  
21 205

### 22 206 **Influence of Government Pricing Policies on Average Purchase Volumes**

23  
24  
25 207 The average volume purchased of all 52 antineoplastic medications, measured in DDD,  
26 208 rose from 33,370 DDD in October 2011 to 66,189 DDD in June 2016 (Table 1, Figure  
27 209 3. There were no statistically significant changes in volume levels or trends after  
28 210 government price regulation or deregulation in any group.

29  
30  
31  
32 211

33  
34 212 Figure 3. Influence of government price regulation and deregulation on monthly  
35 213 average purchase volumes among price-regulated medications (n = 30), price-  
36 214 unregulated medications (n = 22), all medications (n = 52), and the difference between  
37 215 groups, 2011-2016.

38  
39  
40  
41 216

### 42 217 **Influence of Government Pricing Policies on Hospital Spending**

43  
44 218 Average hospital spending on all antineoplastic medications rose from 9.86 million  
45 219 CNY in October 2011 to 17.08 million CNY in June 2016 (Table 1, Figure 4). There  
46 220 were no statistically significant changes in spending levels or trends after government  
47 221 price regulation or deregulation in any of the groups. However, the spending on price-  
48 222 regulated medications decreased and spending on price-unregulated medications  
49 223 increased after both the regulation and deregulation policies, resulting in significant  
50 224 level and trend changes in the differences between the two groups. After government  
51 225 price regulation, the spending difference decreased suddenly (level change  $\beta = -1.570$ ,  
52 226  $P < 0.01$ ) and increased somewhat more slowly ( $\beta = -0.219$ ,  $P < 0.01$ ) than in the  
53 227 baseline period. At 12 months after regulation, the absolute spending difference

54  
55  
56  
57  
58  
59  
60

228 between the groups was significantly lower (-4.508 mio CNY,  $P < 0.05$ ) than would  
229 have been expected without the regulation.

230 After the deregulation policy was implemented, the spending difference dropped again  
231 (level change  $\beta = -1.301$ ,  $P < 0.01$ ), although followed by an increasing trend ( $\beta = 0.117$ ,  
232  $P < 0.05$ ). By the end of follow-up, the relative difference between groups had returned  
233 to nearly the level expected based on the trend at the time of the price regulation policy.

234

235 Figure 4. Influence of government price regulation and deregulation on monthly  
236 average spending on price-regulated medications ( $n = 30$ ), price-unregulated  
237 medications ( $n = 22$ ), all medications ( $n = 52$ ), and difference between groups, 2011-  
238 2016.

239

## 240 Discussion

241 In this study, we investigated the effects of maximum retail price regulation and  
242 subsequent deregulation for groups of antineoplastic medications in China. We found  
243 that after setting maximum retail prices, the relative price of regulated products fell and  
244 that of price-unregulated products increased; the price of all study medications as a  
245 group decreased significantly compared to the 2011 baseline price; after government  
246 deregulation, no significant change occurred in either group. Neither setting  
247 maximum retail prices nor price deregulation significantly affected volumes purchased  
248 or spending on regulated or unregulated medications. However, compared to price-  
249 unregulated medications, spending on price-regulated medications dropped  
250 significantly after price regulation and deregulation.

251 Our results indicate that, as expected, a price-cap policy was effective in decreasing  
252 the prices of selected antineoplastic medications. Most medicines in the intervention  
253 group were products with intense market competition, possibly facilitating  
254 implementation of price caps. This might not be the case for originator products with  
255 only one supplier in the market. Such medicines were not price-regulated at the time.  
256 We have previously shown this effect for digestive system medications,<sup>39</sup> and others  
257 have found similar decreases in price for antihyperlipidemic agents.<sup>40</sup>

258 We did not find the expected price increase after deregulation for the price-regulated  
259 medications. This could be due to the fact that medication prices in China are also  
260 influenced by the provincial tendering system. Since 2009, the medication tendering  
261 process is conducted at the provincial level, with different assessment criteria, usually  
262 a composite score of product quality and price, to determine the winner.<sup>41</sup> Hence, the

1  
2  
3  
4  
5  
6  
7  
8  
9  
10  
11  
12  
13  
14  
15  
16  
17  
18  
19  
20  
21  
22  
23  
24  
25  
26  
27  
28  
29  
30  
31  
32  
33  
34  
35  
36  
37  
38  
39  
40  
41  
42  
43  
44  
45  
46  
47  
48  
49  
50  
51  
52  
53  
54  
55  
56  
57  
58  
59  
60

tendering mechanism could have constrained medication price increases after government deregulation.<sup>42</sup> The provincial tendering process could also explain the price decreases in both groups observed prior to the national government price regulation. Further, generic entry, particularly for the older price-regulated cytotoxic medications, may explain why relative medication prices did not increase after government price deregulation. With the Chinese government encouraging the development of pharmaceutical enterprises, more generic medications have come to the market, which might improve the availability and the affordability of antineoplastic agents.<sup>43</sup>

We found no significant changes in purchase volumes or spending on either price-regulated or price-unregulated medications. When prices of regulated products decreased in comparison to price-unregulated products following the introduction of maximum retail prices, we did not observe a compensatory increase in the use of regulated products, but spending on products in the price-regulated group decreased. Medication utilization and spending were likely also affected by reimbursement policies, which restricted the total hospital spending on insurance-listed and price-regulated products but not on unregulated medications.<sup>44,45</sup>

Finally, prescribers may have maintained a preference for the newer, more expensive medications in the price-unregulated group.<sup>46</sup> Studies in China<sup>47</sup> and Italy<sup>48</sup>, have shown that volume and medication utilization mix, rather than prices, determine overall medication expenditures. This may indicate that it is difficult to manage medication spending increases solely by regulating the prices of some medications in a therapeutic class. Before 2015, China's Drugs Price Addition Policy allowed hospitals to charge and keep 15% of the medication sales budget,<sup>49</sup> and hospitals were incentivized to preferentially prescribe higher priced products.<sup>50</sup> Since 2015, the zero mark-up policy which canceled the mark-up by public health facilities has been gradually introduced for all medications at all public hospitals, presumably eliminating these incentives to use more and higher-priced medications.<sup>51</sup> However, prescribing habits developed prior to the zero mark-up policy may still prevail.

292

### 293 **Limitations**

294 The study had some limitations. First, we were unable to obtain the full list of products  
295 under government price regulation since 1996, which could lead to selection bias..  
296 Second, the inherent limitation of Laspeyres index may lead to underestimating the  
297 price decreases. However, the impact of this limitation was limited, since price  
298 elasticity of demand for medicines is relatively small. Third, the comparison group of

1  
2  
3 299 price-unregulated oncology medications tended to include newer, more expensive  
4 300 products than the price-regulated group and the two groups differed in other  
5 301 characteristics such as indications and therapeutic status in treatment. However, the Lp  
6 302 trends observed at baseline in the two groups of products were quite similar, suggesting  
7 303 that differential changes observed following the government pricing policies were  
8 304 indicative of true differences. Fourth, given that our analyses are based on procurement  
9 305 data we have not information on indications of use and potential therapeutic substitution.  
10 306 Fifth, some new antineoplastic drugs not included in the NRDL and thus not price-  
11 307 regulated may be made available by manufacturers' access programs (like buy 3 get 3  
12 308 free) for individual patients. These products would not be part of our price, volume, or  
13 309 spending analyses because they would be transacted directly between individual  
14 310 physicians, their patients, and the manufacturer (or an intermediary). However, the  
15 311 number of patients who participated in access programs was limited and almost 70% of  
16 312 medication sales in China occur in hospitals.<sup>52</sup> Sixth, given our use of aggregated  
17 313 hospital procurement data, we could not assess factors such as the numbers of patients  
18 314 treated or appropriate use given levels of medication spending or volume.

315

## 316 **Conclusion**

317 Compared to unregulated antineoplastic, the prices of regulated antineoplastic  
318 medications decreased after setting price caps, but did not increase after deregulation.  
319 Neither of these policies affected volumes purchased or hospital spending on all  
320 antineoplastic medications. To control the rapid growth of oncology medication  
321 expenditures, more effective measures than setting price caps for selected (typically  
322 older) antineoplastic medications need to be taken.

323

## 324 **Acknowledgements**

325 We thank staff of Chinese Pharmaceutical Association for their support and cooperation  
326 in data access and analysis.

327

## 328 **Competing Interests:**

329 The authors declared no competing interests.

330

## 331 **Funding**

332

1  
2  
3 332 This study was funded by National Natural Science Foundation of China (Grant  
4 333 No.71774005). The funders had no role in study design, data collection and analysis,  
5 334 decision to publish, or preparation of the manuscript. Dr. Wagner received partial  
6 335 support from the Department of Population Medicine Ebert Award.  
7  
8  
9

10 336

### 11 337 **Ethics approval and consent to participate**

12 338 The study was considered not human subjects research by the Harvard Pilgrim Health  
13 339 Care Institutional Review Board.  
14

15 340

### 16 341 **Data availability statement**

17 342 Data on products purchased between October 2011 and June 2016 were extracted from  
18 343 the observational Chinese Medical Economic Information (CMEI) database of public  
19 344 hospital medication purchasing records. However, this data are unavailable to the  
20 345 public due to its confidentiality.  
21

22 346

### 23 347 **Copyright**

24 348 The Corresponding Author has the right to grant on behalf of all authors and does grant  
25 349 on behalf of all authors, a worldwide licence to the Publishers and its licensees in  
26 350 perpetuity, in all forms, formats and media (whether known now or created in the  
27 351 future), to i) publish, reproduce, distribute, display and store the Contribution, ii)  
28 352 translate the Contribution into other languages, create adaptations, reprints, include  
29 353 within collections and create summaries, extracts and/or, abstracts of the Contribution,  
30 354 iii) create any other derivative work(s) based on the Contribution, iv) to exploit all  
31 355 subsidiary rights in the Contribution, v) the inclusion of electronic links from the  
32 356 Contribution to third party material where-ever it may be located; and, vi) licence any  
33 357 third party to do any or all of the above.  
34

35 358

### 36 359 **Referenc**

37  
38  
39  
40  
41  
42  
43  
44  
45  
46  
47  
48  
49  
50  
51  
52  
53  
54  
55 1 Prasad V, De Jesús K, Mailankody S. The high price of anticancer drugs: origins, implications,  
56 56 barriers, solutions. *Nat Rev Clin Oncol*. 2017 Jun;14(6):381-390.  
57

58 2 Mailankody, S, Prasad, V. Five years of cancer drug approvals: innovation, efficacy, and costs.  
59 59 *JAMA Oncol*. 2015 Jul;1(4):539-40.  
60



1  
2  
3  
4  
5 3 Tefferi A, Kantarjian H, Rajkumar S V, et al. In support of a patient-driven initiative and petition  
6 to lower the high price of cancer drugs. *Mayo Clin Proc.* 2015 Aug;90(8):996-1000.

7  
8  
9 4 Ezekiel Emanuel. We can't afford the drugs that could cure cancer. *The Wall Street Journal.* 2018  
10 Sep. <https://www.wsj.com/articles/we-cant-afford-the-drugs-that-could-cure-cancer-1537457740>

11  
12 5 Ess SM, Schneeweiss S, Szucs TD. European healthcare policies for controlling drug expenditure.  
13 *Pharmacoeconomics.* 2003;21(2):89-103.

14  
15  
16 6 Stargardt T, Schreyögg J, Busse R. Pricing behaviour of pharmacies after market deregulation for  
17 OTC drugs: The case of Germany. *Health Policy.* 2007 Nov;84(1):30-8.

18  
19  
20 7 Puig-Junoy J, López-Valcárcel BG. Launch price for new pharmaceuticals in the heavily regulated  
21 and subsidized Spanish market, 1995–2007. *Health Policy.* 2014 Jun;116(2-3):170-81.

22  
23  
24 8 Srinivasan S, Srikrishna T, Phadke A. Drug price control order 2013. As good as a leaky bucket[J].  
25 *Economic and Political Weekly,* 2013, 29(6): 130.

26  
27  
28 9 De Jaegher K, Jegers M. A model of physician behaviour with demand inducement. *J Health*  
29 *Econ.* 2000 Mar;19(2):231-258.

30  
31  
32 10 Danzon PM, Epstein AJ. Effects of regulation on drug launch and pricing in interdependent  
33 markets. *Adv Health Econ Health Serv Res.* 2012;23:35-71.

34  
35  
36 11 Puig-Junoy J . Impact of European Pharmaceutical Price Regulation on Generic Price  
37 Competition[J]. *PharmacoEconomics,* 2010, 28(8):649-663.

38  
39  
40 12 Brekke K R , Grasdal A L , Holms T H . Regulation and pricing of pharmaceuticals: Reference  
41 pricing or price cap regulation?[J]. *European Economic Review,* 2009, 53.

42  
43  
44 13 Reiffen D , Ward M R . Generic Drug Industry Dynamics[J]. *Review of Economics and Statistics,*  
45 2005, 87(1):37-49.

46  
47  
48 14 Magazzini L , Pammolli F , Riccaboni M . Dynamic Competition in Pharmaceuticals: Patent  
49 Expiry, Generic Penetration, and Industry Structure[J]. *MPRA Paper,* 2004, 5(2):175-182.

50  
51  
52 15 Wu B, Zhang Q, Qiao X. Evaluation of the China's pharmaceutical price regulations using a  
53 macro data during 1997-2008. *J Asia Pacific Econ.* 2015 Apr 3;20(2):290-329.

54  
55  
56 16 Miziara NM, Coutinho DR. Problems in the regulatory policy of the drug market. *Rev Saude*  
57 *Publica.* 2015;49:35.

58  
59  
60 17 Danzon, Patricia M. and Chao, Li-Wei, Does Regulation Drive Out Competition in  
Pharmaceutical Markets?. *Journal of Law and Economics,* Vol. 43, No. 2, October 2000. Available

---

at SSRN: <https://ssrn.com/abstract=231772>

18 Ekelund, M., & Persson, B. (2003). Pharmaceutical pricing in a regulated market. *The Review of Economics and Statistics*, 85(2), 298–306.

19 National Development and Reform Commission. Notice on the Government Pricing Scheme for Medicines [Original language: Chinese][OL].[2003-10-21]. [http://zwgk.gd.gov.cn/006939828/201308/t20130830\\_399800.html](http://zwgk.gd.gov.cn/006939828/201308/t20130830_399800.html). Accessed 2019-09-05.

20 National Development and Reform Commission. List of Priced Drugs of the National Development and Reform Commission [Original language: Chinese][OL].[2019-03-25]. [http://www.ndrc.gov.cn/fzgggz/jggl/zcfg/200508/t20050802\\_747962.html](http://www.ndrc.gov.cn/fzgggz/jggl/zcfg/200508/t20050802_747962.html)

21 National Development and Reform Commission. Notice on the Government Pricing Scheme for Immune system, Anti-cancer and Blood system Medicines. [Original language: Chinese][OL].[2019-09-06]. [http://www.ndrc.gov.cn/fzgggz/jggl/zcfg/201209/t20120918\\_505462.html](http://www.ndrc.gov.cn/fzgggz/jggl/zcfg/201209/t20120918_505462.html).

22 Sabirina Luk (2015) The Politics of Drug Price Control Policy in China: Regulation, Deregulation and Re-regulation, *Journal of Contemporary East Asia Studies*, 4:1, 41-54, DOI: 10.1080/24761028.2015.11869080.

23 National Development and Reform Commission. List of Priced Drugs of the National Development and Reform Commission [Original language: Chinese][OL].[2019-03-25]. [http://www.ndrc.gov.cn/fzgggz/jggl/zcfg/200508/t20050802\\_747962.html](http://www.ndrc.gov.cn/fzgggz/jggl/zcfg/200508/t20050802_747962.html).

24 Tie-Min Z , Cong-Cong W , Feng G . Results and Analysis of China Total Expenditure on Health in 2009[J]. *Chinese Health Economics*, 2011.

25 WAN Quan, ZHANG Yu-hui, WANG Xiu-feng. Results and Analysis of China National Health Accounts in 2013[J]. *Chinese Health Economics*.2015,03.

26 Hasan Syed Shahzad, Kow Chia Siang, Dawoud Dalia, et al. Pharmaceutical Policy Reforms to Regulate Drug Prices in Asia Pacific Region: The Case of Australia, China, India, Malaysia, New Zealand, and South Korea. *Value in health regional issues*. 2018 Nov; 18-23. DOI:10.1016/j.vhri.2018.08.007

27 National Development and Reform Commission. Notice on the Government Pricing Scheme for Immune system, Anti-cancer and Blood system Medicines. [Original language: Chinese][OL].[2019-09-06]. [http://www.ndrc.gov.cn/fzgggz/jggl/zcfg/201209/t20120918\\_505462.html](http://www.ndrc.gov.cn/fzgggz/jggl/zcfg/201209/t20120918_505462.html)

- 1  
2  
3  
4  
5 28 National Development and Reform Commission. Abolishment of government (guided) pricing  
6 for the majority of drugs and push to the drug pricing reform [Original language:  
7 Chinese][OL].[2015-05-  
8 04][http://www.ndrc.gov.cn/fzgggz/jggj/zcfg/201505/t20150505\\_748470.html](http://www.ndrc.gov.cn/fzgggz/jggj/zcfg/201505/t20150505_748470.html). Accessed 2019-09-  
9 05.  
10  
11  
12  
13 29 Wagner AK, Soumerai SB, Zhang F, et al. Segmented regression analysis of interrupted time  
14 series studies in medication use research[J]. *J Clin Pharm Ther*. 2002 Aug, 27(4):299-309.  
15  
16  
17 30 Guan X , Tian Y , Ross-Degnan D , et al. Interrupted time-series analysis of the impact of generic  
18 market entry of antineoplastic products in China[J]. *BMJ Open*, 2018, 8(7).  
19  
20  
21 31 WHO Collaborating Centre for Drug Statistics Methodology. New ATC codes 2019 [OL]. Apr  
22 14, 2019.  
23 [https://www.whocc.no/atc\\_ddd\\_index/updates\\_included\\_in\\_the\\_atc\\_ddd\\_index/new\\_atc\\_codes\\_2](https://www.whocc.no/atc_ddd_index/updates_included_in_the_atc_ddd_index/new_atc_codes_2019/)  
24 019/  
25  
26  
27 32 Danzon D P M , Kim J D . International Price Comparisons for Pharmaceuticals[J].  
28 *PharmacoEconomics*, 1998, 14(1 Supplement):115-128.  
29  
30  
31 33 International Monetary Fund. Inter national Financial Statistics[OL]. Apr 20, 2019.  
32 <https://data.worldbank.org.cn/indicator/PA.NUS.FCRF?locations=CN>  
33  
34  
35 34 National Bureau of Staattistics of China. Time Series Data -- Monthly Data: Consumer Price  
36 Index[OL]. Jan 14, 2019. <http://www.stats.gov.cn/english/Statisticaldata>  
37  
38  
39 35 Zhang F, Wagner AK, Soumerai SB, et al. Methods for estimating confidence intervals in  
40 interrupted time series analyses of health interventions[J]. *J Clin Epidemiol*. 2009 Feb, 62(2):143-  
41 8. doi: 10.1016/j.jclinepi.2008.08.007.  
42  
43  
44 36 J. DURBIN, G. S. WATSON; TESTING FOR SERIAL CORRELATION IN LEAST  
45 SQUARES REGRESSION. I, *Biometrika*, Volume 37, Issue 3-4, 1 December 1950, Pages 409–  
46 428, <https://doi.org/10.1093/biomet/37.3-4.409>.  
47  
48  
49 37Kutner MH, Nachtsheim CJ, Neter J. *Applied Linear Regression Models* (4th edn),  
50 Irwin/McGraw-Hill: Chicago, 2004.  
51  
52  
53 38 STATA software. StataCorp LLC, College Station, TX, <https://www.stata.com/stata14/>  
54  
55  
56 39 YANG Ming-chun, TIAN Ye, ZOU Wu-jie, et al. Influence of government regulation and  
57 deregulation on the drugs' price: A case study in digestive drug (in Chinese). *Chinese Journal of*  
58 *Health Policy*. 2018 Sep; 11(9): 53-58.  
59  
60

---

40 Kwon H Y , Hong J M , Godman B , et al. Price cuts and drug spending in South Korea: The case of antihyperlipidemic agents[J]. *Health Policy*, 2013, 112(3):217-226.

41 Oortwijn W, Mathijssen J, Banta D. The role of health technology assessment on pharmaceutical reimbursement in selected middle-income countries. *Health Policy (New York)* 2010;95: 174–84.

42 Liu J, Wang L, Liu C, et al. Impact of price deregulation policy on the affordability of essential medicines for women's health: a panel data analysis.[J]. *Expert Review of Pharmacoeconomics & Outcomes Research*, 2017:1.

43 Guan X , Tian Y , Ross-Degnan D , et al. Interrupted time-series analysis of the impact of generic market entry of antineoplastic products in China[J]. *BMJ Open*, 2018, 8(7).

44 Tang S , Tao J , Bekedam H . Controlling Cost Escalation of Healthcare: Making Universal Health Coverage Sustainable in China[J]. *BMC Public Health*, 2012, 12 Suppl 1(Suppl 1):S8.

45 Huang Y , Liu Y , Yang X , et al. Global budget payment system helps to reduce outpatient medical expenditure of hypertension in China[J]. *SpringerPlus*, 2016, 5(1):1877.

46 Zhou Zhongliang, Yanfang Su, Benjamin Campbell, et al. The Financial Impact of the 'Zero-Markup Policy for Essential Drugs' on Patients in County Hospitals in Western Rural China. *PLoS One*. 2015;10(3). <http://dx.doi.org/10.1371/journal.pone.0121630>

47 Meng Q, Cheng G, Silver L, Sun X, Rehnberg C, Tomson G. The impact of China's retail drug price control policy on hospital expenditures: a case study in two Shandong hospitals. *Health Policy Plan*. 2005 May;20(3):185-96.

48 Addis A, Magrini N. New approaches to analysing prescription data and to transfer pharmacoepidemiological and evidence-based reports to prescribers. *Pharmacoepidemiol Drug Saf*. 2002 Dec;11(8):721-6.

49 Mao Wenhui, Huyen Vu, Zening Xie, et al. Systematic Review on Irrational use of Medicines in China and Vietnam. *PLoS One*. 2015;10(3). <http://dx.doi.org/10.1371/journal.pone.0117710>

50 Yip W , Hsiao W . China's health care reform: A tentative assessment[J]. *China Economic Review*, 2009, 20(4):0-619.

51 Hu J , Mossialos E , Kesteloot K , et al. Pharmaceutical pricing and reimbursement in China: When the whole is less than the sum of its parts[J]. *Health Policy*, 2016, 120(5):519-534.

52 WAN Quan, ZHANG Yu-hui, WANG Xiu-feng. Results and Analysis of China National Health Accounts in 2013[J]. *Chinese Health Economics*.2015,03.

1  
2  
3  
4  
5  
6  
7  
8  
9  
10  
11  
12  
13  
14  
15  
16  
17  
18  
19  
20  
21  
22  
23  
24  
25  
26  
27  
28  
29  
30  
31  
32  
33  
34  
35  
36  
37  
38  
39  
40  
41  
42  
43  
44  
45  
46  
47  
48  
49  
50  
51  
52  
53  
54  
55  
56  
57  
58  
59  
60

For peer review only

1  
2  
3  
4  
5  
6  
7  
8  
9  
10  
11  
12  
13  
14  
15  
16  
17  
18  
19  
20  
21  
22  
23  
24  
25  
26  
27  
28  
29  
30  
31  
32  
33  
34  
35  
36  
37  
38  
39  
40  
41  
42  
43  
44  
45  
46  
47  
48  
49  
50  
51  
52  
53  
54  
55  
56  
57  
58  
59  
60



Figure 1. Timeline of price regulation and deregulation of 52 antineoplastic medications

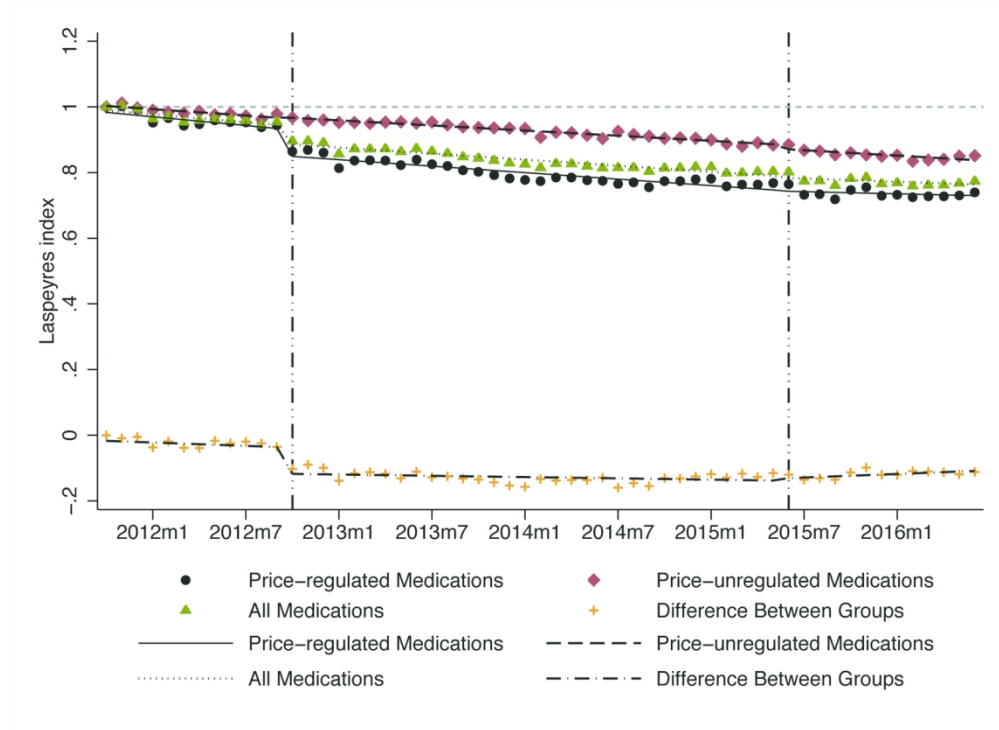

Figure 2. Influence of government price regulation and deregulation on monthly Laspeyres index (Lp) among price-regulated medications (n=30), price-unregulated medications (n = 22), all medications (n = 52), and the difference between regulated and unregulated medications, 2011-2016.

139x101mm (300 x 300 DPI)

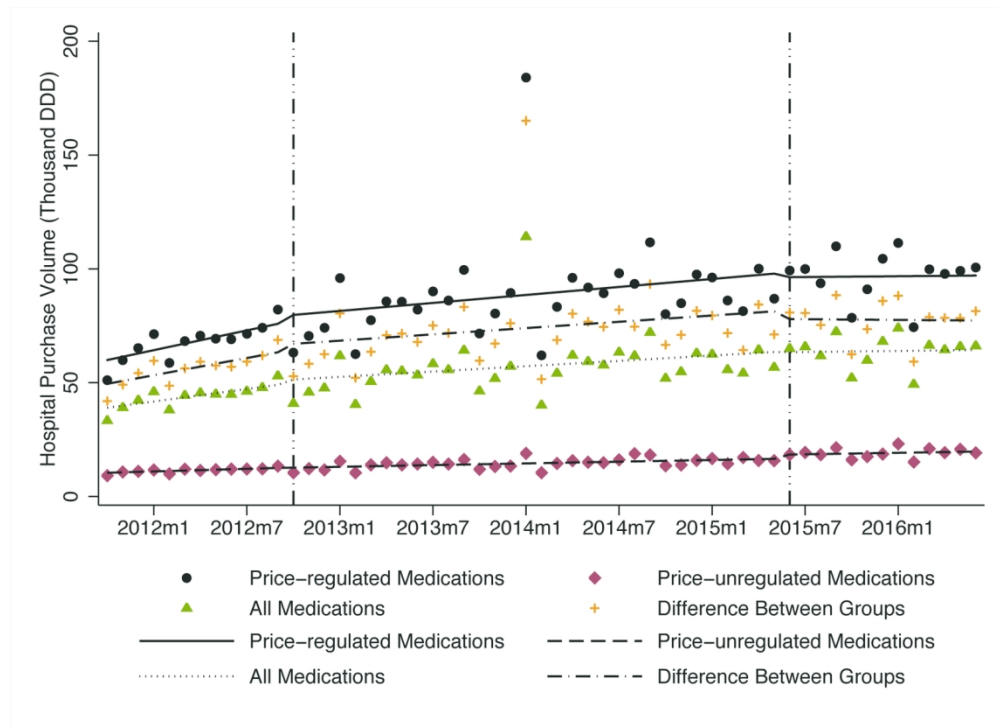

Figure 3. Influence of government price regulation and deregulation on monthly average purchase volumes among price-regulated medications (n = 30), price-unregulated medications (n = 22), all medications (n = 52), and the difference between groups, 2011-2016.

139x101mm (300 x 300 DPI)





Figure 4. Influence of government price regulation and deregulation on monthly average spending on price-regulated medications (n = 30), price-unregulated medications (n = 22), all medications (n = 52), and difference between groups, 2011-2016.

139x101mm (300 x 300 DPI)

Supplement 1A. Antineoplastic medications samples of the intervention group

| Generic Name | ATC     | Classification | Manufactures <sup>1</sup> | Indications Approved in China                                                                                                                                                        |
|--------------|---------|----------------|---------------------------|--------------------------------------------------------------------------------------------------------------------------------------------------------------------------------------|
| aclarubicin  | L01DB04 | chemotherapy   | originator only           | acute leukemia; malignant lymphoma;                                                                                                                                                  |
| altretamine  | L01XX03 | chemotherapy   | generic only              | ovarian cancer; small cell lung cancer; malignant lymphoma; endometrial cancers;                                                                                                     |
| asparaginase | L01XX02 | chemotherapy   | originator and generic    | acute lymphoblastic leukemia, ALL; acute myeloid leukemia, AML; acute monocytic leukemia, AMOL; chronic myeloid leukemia, CML; Hodgkin's lymphoma; non-Hodgkin's lymphoma; melanoma; |
| bleomycin    | L01DC01 | chemotherapy   | originator and generic    | Cutaneous Carcinoma; head and neck cancer; lung cancer; esophageal cancer; malignant lymphoma; cervical carcinoma; neuroglioma; thyroid carcinoma;                                   |
| busulfan     | L01AB01 | chemotherapy   | originator only           | chronic myeloid leukemia; Essential Thrombocythemia, polycythemia vera and other chronic myeloproliferative disorders, CMPDs                                                         |
| carboplatin  | L01XA02 | chemotherapy   | originator and generic    | ovarian cancer; small cell lung cancer; head and neck squamous cell carcinoma;                                                                                                       |
| carmofur     | L01BC04 | chemotherapy   | generic only              | gastrointestinal cancer(colon cancer, colorectal cancer, gastric cancer, esophagus cancer); breast cancer;                                                                           |
| carmustine   | L01AD01 | chemotherapy   | generic only              | encephaloma; brain metastases; meningeal leukemia; malignant lymphoma; multiple myeloma; malignant melanoma;                                                                         |
| dacarbazine  | L01AX04 | chemotherapy   | generic only              | melanoma; soft tissue tumor; malignant lymphoma;                                                                                                                                     |

|    |                     |         |              |                        |                                                                                                                                                                        |
|----|---------------------|---------|--------------|------------------------|------------------------------------------------------------------------------------------------------------------------------------------------------------------------|
| 1  |                     |         |              |                        |                                                                                                                                                                        |
| 2  |                     |         |              |                        |                                                                                                                                                                        |
| 3  |                     |         |              |                        |                                                                                                                                                                        |
| 4  |                     |         |              |                        |                                                                                                                                                                        |
| 5  | daunorubicin        | L01DB02 | chemotherapy | generic only           | acute myeloid leukemia, AML; acute lymphoblastic leukemia, ALL;                                                                                                        |
| 6  |                     |         |              |                        |                                                                                                                                                                        |
| 7  |                     |         |              |                        |                                                                                                                                                                        |
| 8  | docetaxel           | L01CD02 | chemotherapy | originator and generic | breast cancer; non-small cell lung cancer;                                                                                                                             |
| 9  |                     |         |              |                        |                                                                                                                                                                        |
| 10 |                     |         |              |                        |                                                                                                                                                                        |
| 11 | doxifluridine       | /       | chemotherapy | generic only           | Breast cancer; gastric cancer; colorectal cancer; nasopharyngeal cancer;                                                                                               |
| 12 |                     |         |              |                        |                                                                                                                                                                        |
| 13 |                     |         |              |                        |                                                                                                                                                                        |
| 14 | epirubicin          | L01DB03 | chemotherapy | originator and generic | leukemia; malignant lymphoma; multiple myeloma; breast cancer; lung cancer; soft tissue tumor; gastric cancer; liver cancer; colorectal cancer; ovarian cancer;        |
| 15 |                     |         |              |                        |                                                                                                                                                                        |
| 16 |                     |         |              |                        |                                                                                                                                                                        |
| 17 |                     |         |              |                        |                                                                                                                                                                        |
| 18 | etoposide           | L01CB01 | chemotherapy | generic only           | small cell lung cancer; malignant lymphoma; leukemia; neuroblastoma; rhabdomyosarcom; gastric cancer; esophageal carcinoma; malignant germ cell tumor; ovarian cancer; |
| 19 |                     |         |              |                        |                                                                                                                                                                        |
| 20 |                     |         |              |                        |                                                                                                                                                                        |
| 21 |                     |         |              |                        |                                                                                                                                                                        |
| 22 |                     |         |              |                        |                                                                                                                                                                        |
| 23 | fludarabine         | L01BB05 | chemotherapy | originator and generic | chronic lymphocytic leukemia;                                                                                                                                          |
| 24 |                     |         |              |                        |                                                                                                                                                                        |
| 25 |                     |         |              |                        |                                                                                                                                                                        |
| 26 |                     |         |              |                        |                                                                                                                                                                        |
| 27 | fluorouracil        | L01BC02 | chemotherapy | generic only           | Gastrointestinal Cancer; chorionepithelioma; breast cancer; Ovarian Carcinoma; lung cancer; cervical carcinoma; bladder cancer; skin cancer;                           |
| 28 |                     |         |              |                        |                                                                                                                                                                        |
| 29 |                     |         |              |                        |                                                                                                                                                                        |
| 30 | gemcitabine         | L01BC05 | chemotherapy | originator and generic | non-small cell lung cancer; pancreatic cancer; breast cancer;                                                                                                          |
| 31 |                     |         |              |                        |                                                                                                                                                                        |
| 32 |                     |         |              |                        |                                                                                                                                                                        |
| 33 |                     |         |              |                        |                                                                                                                                                                        |
| 34 | hydroxycamptothecin | /       | chemotherapy | originator and generic | primary liver cancer; gastric cancer; bladder cancer; rectal cancer; head and neck epithelial cancer; leukemia and other malignant tumors                              |
| 35 |                     |         |              |                        |                                                                                                                                                                        |
| 36 |                     |         |              |                        |                                                                                                                                                                        |
| 37 | lobaplatin          | /       | chemotherapy | originator only        | breast cancer; small cell lung cancer; chronic myeloid leukemia                                                                                                        |
| 38 |                     |         |              |                        |                                                                                                                                                                        |
| 39 |                     |         |              |                        |                                                                                                                                                                        |
| 40 |                     |         |              |                        |                                                                                                                                                                        |
| 41 |                     |         |              |                        |                                                                                                                                                                        |
| 42 |                     |         |              |                        |                                                                                                                                                                        |
| 43 |                     |         |              |                        |                                                                                                                                                                        |
| 44 |                     |         |              |                        |                                                                                                                                                                        |
| 45 |                     |         |              |                        |                                                                                                                                                                        |
| 46 |                     |         |              |                        |                                                                                                                                                                        |

|    |                                           |         |              |                        |                                                                                                                                  |
|----|-------------------------------------------|---------|--------------|------------------------|----------------------------------------------------------------------------------------------------------------------------------|
| 1  |                                           |         |              |                        |                                                                                                                                  |
| 2  |                                           |         |              |                        |                                                                                                                                  |
| 3  |                                           |         |              |                        |                                                                                                                                  |
| 4  |                                           |         |              |                        |                                                                                                                                  |
| 5  | nedaplatin                                | /       | chemotherapy | generic only           | Solid tumors such as head and neck cancer, small cell lung cancer, non-small cell lung cancer and esophageal cancer              |
| 6  |                                           |         |              |                        |                                                                                                                                  |
| 7  |                                           |         |              |                        |                                                                                                                                  |
| 8  | nimustine                                 | L01AD06 | chemotherapy | originator and generic | brain tumor; gastrointestinal cancer; lung cancer; malignant lymphoma; chronic leukemia;                                         |
| 9  |                                           |         |              |                        |                                                                                                                                  |
| 10 |                                           |         |              |                        |                                                                                                                                  |
| 11 | oxaliplatin                               | L01XA03 | chemotherapy | originator and generic | colorectal carcinoma; hepatocellular carcinoma, HCC;                                                                             |
| 12 |                                           |         |              |                        |                                                                                                                                  |
| 13 |                                           |         |              |                        |                                                                                                                                  |
| 14 | semustine                                 | L01AD03 | chemotherapy | generic only           | brain tumor; malignant lymphoma; gastric cancer; colon cancer; melanoma;                                                         |
| 15 |                                           |         |              |                        |                                                                                                                                  |
| 16 | tegafur                                   | L01BC03 | chemotherapy | generic only           | Gastrointestinal Cancer; breast cancer;                                                                                          |
| 17 | tegafur, gimeracil and oteracil porassium | L01BC53 | chemotherapy | generic only           | gastrointestinal cancer( gastric cancer; intestinal cancer; pancreatic cancer); breast cancer; liver cancer;                     |
| 18 |                                           |         |              |                        |                                                                                                                                  |
| 19 |                                           |         |              |                        |                                                                                                                                  |
| 20 |                                           |         |              |                        |                                                                                                                                  |
| 21 | temozolomide                              | L01AX03 | chemotherapy | originator and generic | glioblastoma multiforme, GBM; anaplastic astrocytoma;                                                                            |
| 22 |                                           |         |              |                        |                                                                                                                                  |
| 23 |                                           |         |              |                        |                                                                                                                                  |
| 24 | teniposide                                | L01CB02 | chemotherapy | originator and generic | malignant lymphoma; central nervous system-tumors; bladder cancer;                                                               |
| 25 |                                           |         |              |                        |                                                                                                                                  |
| 26 |                                           |         |              |                        |                                                                                                                                  |
| 27 | topotecan                                 | L01XX17 | chemotherapy | originator and generic | small cell lung cancer; ovarian cancer;                                                                                          |
| 28 |                                           |         |              |                        |                                                                                                                                  |
| 29 |                                           |         |              |                        |                                                                                                                                  |
| 30 | vindesine                                 | L01CA03 | chemotherapy | generic only           | non-small cell lung cancer; small cell lung cancer; malignant lymphoma; breast cancer; esophageal carcinoma; malignant melanoma; |
| 31 |                                           |         |              |                        |                                                                                                                                  |
| 32 |                                           |         |              |                        |                                                                                                                                  |
| 33 | vinorelbine                               | L01CA04 | chemotherapy | originator and generic | non-small cell lung cancer; breast cancer;                                                                                       |
| 34 |                                           |         |              |                        |                                                                                                                                  |

<sup>1</sup> Manufactures of specific medications during our study period.

## Supplement 1B. Antineoplastic medications samples of the intervention group

| Generic Name              | ATC     | Classification   | Manufactures <sup>1</sup> | Indications Approved in China                                                                                                                                       |
|---------------------------|---------|------------------|---------------------------|---------------------------------------------------------------------------------------------------------------------------------------------------------------------|
| actinomycin D             | L01DA01 | chemotherapy     | originator and generic    | Hodgkin's disease; neuroblastoma; choriocarcinoma; testicular cancer; Wilms'tumor; Ewing's sarcoma; rhabdomyosarcoma                                                |
| amsacrine                 | L01XX01 | chemotherapy     | generic only              | acute leukemia; malignant lymphoma;                                                                                                                                 |
| arsenite                  | L01XX27 | chemotherapy     | generic only              | acute promyelocytic leukemia, APL; liver cancer;                                                                                                                    |
| bortezomib                | L01XX32 | targeted therapy | originator and generic    | multiple myeloma; mantle cell lymphoma;                                                                                                                             |
| cetuximab                 | L01XC06 | targeted therapy | originator only           | colorectal cancer;                                                                                                                                                  |
| decitabine                | L01BC08 | chemotherapy     | originator and generic    | myelodysplastic syndrome(MDS);                                                                                                                                      |
| doxorubicin               | L01DB01 | chemotherapy     | originator and generic    | acute myeloid leukemia; lymphoma; soft tissue tumor and osteosarcoma; children malignant tumour; solid tumor in adults; particularly breast cancer and lung cancer; |
| erlotinib                 | L01XE03 | targeted therapy | originator only           | non-small cell lung cancer;                                                                                                                                         |
| floxuridine               | L01BC09 | chemotherapy     | generic only              | liver cancer; rectum cancer; esophageal cancer; gastric cancer; breast cancer;lung cancer;                                                                          |
| fluorouracil combinations | L01BC52 | chemotherapy     | generic only              | gastrointestinal cancer; breast cancer; liver cancer;                                                                                                               |
| gefitinib                 | L01XE02 | targeted therapy | originator only           | non-small cell lung cancer;                                                                                                                                         |
| idarubicin                | L01DB06 | chemotherapy     | originator only           | acute myeloid leukemia, AML; acute lymphoblastic leukemia, ALL;                                                                                                     |

1  
2  
3  
4  
5  
6  
7  
8  
9  
10  
11  
12  
13  
14  
15  
16  
17  
18  
19  
20  
21  
22  
23  
24  
25  
26  
27  
28  
29  
30  
31  
32  
33  
34  
35  
36  
37  
38  
39  
40  
41  
42  
43  
44  
45  
46

|             |         |                  |                        |                                                                                                                                    |
|-------------|---------|------------------|------------------------|------------------------------------------------------------------------------------------------------------------------------------|
| imatinib    | L01XE01 | targeted therapy | originator and generic | chronic myeloid leukemia, CML; gastrointestinal stromal tumors, GIST; acute lymphoblastic leukemia, ALL;                           |
| raltitrexed | L01BA03 | chemotherapy     | originator only        | colorectal cancer;                                                                                                                 |
| rituximab   | L01XC02 | targeted therapy | originator only        | follicle Center Lymphomas; follicular non-Hodgkin's lymphom; diffuse large B-cell lymphoma;                                        |
| sunitinib   | L01XE04 | targeted therapy | originator only        | renal cell cancer, RCC; gastrointestinal stromal tumors, GIST; pancreatic neuroendocrine tumors, pNET;                             |
| sorafenib   | L01XE05 | targeted therapy | originator only        | renal cell cancer; hepatocellular carcinoma; thyroid cancer;                                                                       |
| tioguanine  | L01BB03 | chemotherapy     | generic only           | acute lymphocytic leukemia; acute non-lymphocytic leukemia; chronic myeloid leukemia;                                              |
| nilotinib   | L01XE08 | targeted therapy | originator only        | chronic myeloid leukemia;                                                                                                          |
| trastuzumab | L01XC03 | targeted therapy | originator only        | breast cancer; gastric cancer;                                                                                                     |
| thiotepa    | L01AC01 | chemotherapy     | generic only           | breast cancer; ovarian cancer; bladder cancer; gastrointestinal cancer;                                                            |
| vinblastine | L01CA01 | chemotherapy     | generic only           | acute leukemia; Hodgkin's lymphoma; malignant melanoma; breast cancer; bronchogenic carcinoma; soft tissue sarcoma; neuroblastoma; |

<sup>1</sup> Manufactures of specific medications during our study period.

## STROBE Statement—checklist of items that should be included in reports of observational studies

|                              | Item No | Recommendation                                                                                                                                                                                                                                                                                                                                                                                                                                                                                                                                                                                                                                                                                                                                                    |
|------------------------------|---------|-------------------------------------------------------------------------------------------------------------------------------------------------------------------------------------------------------------------------------------------------------------------------------------------------------------------------------------------------------------------------------------------------------------------------------------------------------------------------------------------------------------------------------------------------------------------------------------------------------------------------------------------------------------------------------------------------------------------------------------------------------------------|
| <b>Title and abstract</b>    | 1       | (a) Indicate the study's design with a commonly used term in the title or the abstract <b>【1】</b><br>(b) Provide in the abstract an informative and balanced summary of what was done and what was found <b>【2】</b>                                                                                                                                                                                                                                                                                                                                                                                                                                                                                                                                               |
| <b>Introduction</b>          |         |                                                                                                                                                                                                                                                                                                                                                                                                                                                                                                                                                                                                                                                                                                                                                                   |
| Background/rationale         | 2       | Explain the scientific background and rationale for the investigation being reported <b>【3】</b>                                                                                                                                                                                                                                                                                                                                                                                                                                                                                                                                                                                                                                                                   |
| Objectives                   | 3       | State specific objectives, including any prespecified hypotheses <b>【4】</b>                                                                                                                                                                                                                                                                                                                                                                                                                                                                                                                                                                                                                                                                                       |
| <b>Methods</b>               |         |                                                                                                                                                                                                                                                                                                                                                                                                                                                                                                                                                                                                                                                                                                                                                                   |
| Study design                 | 4       | Present key elements of study design early in the paper <b>【4】</b>                                                                                                                                                                                                                                                                                                                                                                                                                                                                                                                                                                                                                                                                                                |
| Setting                      | 5       | Describe the setting, locations, and relevant dates, including periods of recruitment, exposure, follow-up, and data collection <b>【4】</b>                                                                                                                                                                                                                                                                                                                                                                                                                                                                                                                                                                                                                        |
| Participants                 | 6       | (a) <i>Cohort study</i> —Give the eligibility criteria, and the sources and methods of selection of participants. Describe methods of follow-up <b>【N/A】</b><br><i>Case-control study</i> —Give the eligibility criteria, and the sources and methods of case ascertainment and control selection. Give the rationale for the choice of cases and controls <b>【N/A】</b><br><i>Cross-sectional study</i> —Give the eligibility criteria, and the sources and methods of selection of participants <b>【N/A】</b><br>(b) <i>Cohort study</i> —For matched studies, give matching criteria and number of exposed and unexposed <b>【N/A】</b><br><i>Case-control study</i> —For matched studies, give matching criteria and the number of controls per case <b>【N/A】</b> |
| Variables                    | 7       | Clearly define all outcomes, exposures, predictors, potential confounders, and effect modifiers. Give diagnostic criteria, if applicable <b>【5】</b>                                                                                                                                                                                                                                                                                                                                                                                                                                                                                                                                                                                                               |
| Data sources/<br>measurement | 8*      | For each variable of interest, give sources of data and details of methods of assessment (measurement). Describe comparability of assessment methods if there is more than one group <b>【4】</b>                                                                                                                                                                                                                                                                                                                                                                                                                                                                                                                                                                   |
| Bias                         | 9       | Describe any efforts to address potential sources of bias <b>【N/A】</b>                                                                                                                                                                                                                                                                                                                                                                                                                                                                                                                                                                                                                                                                                            |
| Study size                   | 10      | Explain how the study size was arrived at <b>【N/A】</b>                                                                                                                                                                                                                                                                                                                                                                                                                                                                                                                                                                                                                                                                                                            |
| Quantitative variables       | 11      | Explain how quantitative variables were handled in the analyses. If applicable, describe which groupings were chosen and why <b>【5】</b>                                                                                                                                                                                                                                                                                                                                                                                                                                                                                                                                                                                                                           |
| Statistical methods          | 12      | (a) Describe all statistical methods, including those used to control for confounding <b>【5】</b><br>(b) Describe any methods used to examine subgroups and interactions <b>【5】</b><br>(c) Explain how missing data were addressed <b>【5】</b><br>(d) <i>Cohort study</i> —If applicable, explain how loss to follow-up was addressed <b>【N/A】</b><br><i>Case-control study</i> —If applicable, explain how matching of cases and controls was addressed <b>【N/A】</b><br><i>Cross-sectional study</i> —If applicable, describe analytical methods taking account of sampling strategy <b>【N/A】</b><br>(e) Describe any sensitivity analyses <b>【N/A】</b>                                                                                                            |

1  
2  
3  
4  
5  
6  
7  
8  
9  
10  
11  
12  
13  
14  
15  
16  
17  
18  
19  
20  
21  
22  
23  
24  
25  
26  
27  
28  
29  
30  
31  
32  
33  
34  
35  
36  
37  
38  
39  
40  
41  
42  
43  
44  
45  
46  
47  
48  
49  
50  
51  
52  
53  
54  
55  
56  
57  
58  
59  
60

Continued on next page

For peer review only



| <b>Results</b>           |     |                                                                                                                                                                                                                                                                                                                                                                                                                                                        |
|--------------------------|-----|--------------------------------------------------------------------------------------------------------------------------------------------------------------------------------------------------------------------------------------------------------------------------------------------------------------------------------------------------------------------------------------------------------------------------------------------------------|
| Participants             | 13* | (a) Report numbers of individuals at each stage of study—eg numbers potentially eligible, examined for eligibility, confirmed eligible, included in the study, completing follow-up, and analysed <b>【N/A】</b><br>(b) Give reasons for non-participation at each stage <b>【N/A】</b><br>(c) Consider use of a flow diagram <b>【N/A】</b>                                                                                                                 |
| Descriptive data         | 14* | (a) Give characteristics of study participants (eg demographic, clinical, social) and information on exposures and potential confounders <b>【N/A】</b><br>(b) Indicate number of participants with missing data for each variable of interest <b>【N/A】</b><br>(c) <i>Cohort study</i> —Summarise follow-up time (eg, average and total amount) <b>【N/A】</b>                                                                                             |
| Outcome data             | 15* | <i>Cohort study</i> —Report numbers of outcome events or summary measures over time <b>【N/A】</b><br><i>Case-control study</i> —Report numbers in each exposure category, or summary measures of exposure <b>【N/A】</b><br><i>Cross-sectional study</i> —Report numbers of outcome events or summary measures <b>【N/A】</b>                                                                                                                               |
| Main results             | 16  | (a) Give unadjusted estimates and, if applicable, confounder-adjusted estimates and their precision (eg, 95% confidence interval). Make clear which confounders were adjusted for and why they were included <b>【6-10】</b><br>(b) Report category boundaries when continuous variables were categorized <b>【6-10】</b><br>(c) If relevant, consider translating estimates of relative risk into absolute risk for a meaningful time period <b>【N/A】</b> |
| Other analyses           | 17  | Report other analyses done—eg analyses of subgroups and interactions, and sensitivity analyses <b>【6-10】</b>                                                                                                                                                                                                                                                                                                                                           |
| <b>Discussion</b>        |     |                                                                                                                                                                                                                                                                                                                                                                                                                                                        |
| Key results              | 18  | Summarise key results with reference to study objectives <b>【10-11】</b>                                                                                                                                                                                                                                                                                                                                                                                |
| Limitations              | 19  | Discuss limitations of the study, taking into account sources of potential bias or imprecision. Discuss both direction and magnitude of any potential bias <b>【11】</b>                                                                                                                                                                                                                                                                                 |
| Interpretation           | 20  | Give a cautious overall interpretation of results considering objectives, limitations, multiplicity of analyses, results from similar studies, and other relevant evidence <b>【11】</b>                                                                                                                                                                                                                                                                 |
| Generalisability         | 21  | Discuss the generalisability (external validity) of the study results <b>【11】</b>                                                                                                                                                                                                                                                                                                                                                                      |
| <b>Other information</b> |     |                                                                                                                                                                                                                                                                                                                                                                                                                                                        |
| Funding                  | 22  | Give the source of funding and the role of the funders for the present study and, if applicable, for the original study on which the present article is based <b>【12】</b>                                                                                                                                                                                                                                                                              |

\*Give information separately for cases and controls in case-control studies and, if applicable, for exposed and unexposed groups in cohort and cross-sectional studies.

**Note:** An Explanation and Elaboration article discusses each checklist item and gives methodological background and published examples of transparent reporting. The STROBE checklist is best used in conjunction with this article (freely available on the Web sites of PLoS Medicine at <http://www.plosmedicine.org/>, Annals of Internal Medicine at <http://www.annals.org/>, and Epidemiology at <http://www.epidem.com/>). Information on the STROBE Initiative is available at [www.strobe-statement.org](http://www.strobe-statement.org).

# BMJ Open

## Influence of Government Price Regulation and Deregulation on the Price of Antineoplastic Medications in China: A Controlled Interrupted Time Series Study

|                                 |                                                                                                                                                                                                                                                                                                                                                                                                                                                                                                                                                                                                                                                                                                                                                                                                                                                                                                                                                                                            |
|---------------------------------|--------------------------------------------------------------------------------------------------------------------------------------------------------------------------------------------------------------------------------------------------------------------------------------------------------------------------------------------------------------------------------------------------------------------------------------------------------------------------------------------------------------------------------------------------------------------------------------------------------------------------------------------------------------------------------------------------------------------------------------------------------------------------------------------------------------------------------------------------------------------------------------------------------------------------------------------------------------------------------------------|
| Journal:                        | <i>BMJ Open</i>                                                                                                                                                                                                                                                                                                                                                                                                                                                                                                                                                                                                                                                                                                                                                                                                                                                                                                                                                                            |
| Manuscript ID                   | bmjopen-2019-031658.R2                                                                                                                                                                                                                                                                                                                                                                                                                                                                                                                                                                                                                                                                                                                                                                                                                                                                                                                                                                     |
| Article Type:                   | Original research                                                                                                                                                                                                                                                                                                                                                                                                                                                                                                                                                                                                                                                                                                                                                                                                                                                                                                                                                                          |
| Date Submitted by the Author:   | 11-Nov-2019                                                                                                                                                                                                                                                                                                                                                                                                                                                                                                                                                                                                                                                                                                                                                                                                                                                                                                                                                                                |
| Complete List of Authors:       | Guan, Xiaodong; School of Pharmceutial Sciences, Peking University, Department of Pharmacy Adiministration and Clinical Pharmacy; Harvard Medical School and Harvard Pilgrim Health Care Institute, Department of Population Medicine<br>Wushouer, Haishaerjiang; Chinese Academy of Engineering, Center for Strategic Studies; Tsinghua University, School of Medicine<br>Yang, Mingchun; School of Pharmceutial Sciences, Peking University, Department of Pharmacy Adiministration and Clinical Pharmacy<br>Han, Sheng; Peking University, International Research Center for Medicinal Administration<br>Shi, Luwen; School of Pharmceutial Sciences, Peking University, Department of Pharmacy Adiministration and Clinical Pharmacy<br>Ross-Degnan, Dennis; Harvard Medical School and Harvard Pilgrim Health Care Institute, Department of Population Medicine<br>Wagner, Anita; Harvard Medical School and Harvard Pilgrim Health Care Institute, Department of Population Medicine |
| <b>Primary Subject Heading</b>: | Health policy                                                                                                                                                                                                                                                                                                                                                                                                                                                                                                                                                                                                                                                                                                                                                                                                                                                                                                                                                                              |
| Secondary Subject Heading:      | Health policy                                                                                                                                                                                                                                                                                                                                                                                                                                                                                                                                                                                                                                                                                                                                                                                                                                                                                                                                                                              |
| Keywords:                       | Price Regulation, Deregulation, Laspeyres index, Antineoplastic Medications                                                                                                                                                                                                                                                                                                                                                                                                                                                                                                                                                                                                                                                                                                                                                                                                                                                                                                                |
|                                 |                                                                                                                                                                                                                                                                                                                                                                                                                                                                                                                                                                                                                                                                                                                                                                                                                                                                                                                                                                                            |

SCHOLARONE™  
Manuscripts

## **Influence of Government Price Regulation and Deregulation on the Price of Antineoplastic Medications in China: A Controlled Interrupted Time Series Study**

Xiaodong Guan <sup>1,2,3</sup>, Haishaerjiang Wushouer <sup>2,4,5</sup>, Mingchun Yang <sup>1</sup>, Sheng Han<sup>2</sup>, Luwen Shi <sup>1,2\*</sup>, Dennis Ross-Degnan <sup>3</sup>, Anita Katharina Wagner <sup>3</sup>

1. Department of Pharmacy Administration and Clinical Pharmacy, School of Pharmaceutical Sciences, Peking University, Beijing, China.

2. International Research Center for Medicinal Administration, Peking University, Beijing, China.

3. Department of Population Medicine, Harvard Medical School and Harvard Pilgrim Health Care Institute, Boston, Massachusetts, USA.

4. Center for Strategic Studies, Chinese Academy of Engineering, Beijing, China.

5. School of Medicine, Tsinghua University, Beijing, China.

Corresponding Author:

Name: Luwen SHI

Title: Professor

Address: 38 Xueyuan Road, Beijing, China, 100191

Phone: +86 10 82805019

Fax number: +86 10 82805019

Email: [shiluwen211@163.com](mailto:shiluwen211@163.com)

Word count: 3325

Contributors: Luwen Shi, Xiaodong Guan, Dennis Ross-Degnan and Anita Katharina Wagner conceptualised and designed the study. Sheng Han and Mingchun Yang contributed to analysis of the data. Xiaodong Guan, Haishaerjiang Wushouer and Mingchun Yang conducted the final analyses. Xiaodong Guan and Haishaerjiang Wushouer drafted the initial manuscript. All authors contributed to the critical revision of the manuscript and approved the final version.

1  
2  
3 **Keywords:** Price Regulation, Deregulation, Laspeyres index, Antineoplastic  
4 Medications  
5  
6  
7  
8  
9  
10  
11  
12  
13  
14  
15  
16  
17  
18  
19  
20  
21  
22  
23  
24  
25  
26  
27  
28  
29  
30  
31  
32  
33  
34  
35  
36  
37  
38  
39  
40  
41  
42  
43  
44  
45  
46  
47  
48  
49  
50  
51  
52  
53  
54  
55  
56  
57  
58  
59  
60

## 1 ABSTRACT

2 Background: In October 2012, the Chinese government established maximum retail  
3 prices for specific products, including 30 antineoplastic medications. Three years later,  
4 in June 2015, the government abolished price regulation for most medications,  
5 including all antineoplastic medications. This study examined the impacts of regulation  
6 and subsequent deregulation of prices of antineoplastic medications in China.

7 Methods: Using hospital procurement data and an interrupted time series (ITS) with  
8 comparison series design, we examined the impacts of the policy changes on relative  
9 purchase prices (Laspeyeres price index) and volumes of and spending on 52  
10 antineoplastic medications in 699 hospitals. We identified three policy periods: prior to  
11 the initial price regulation (October 2011 to September 2012); during price regulation  
12 (October 2012 to June 2015); and after price deregulation (July 2015 to June 2016).

13 Results: During government price regulation, compared to price-unregulated cancer  
14 medications (n = 22, mostly newer targeted products), the relative price of price-  
15 regulated medications (n = 30, mostly chemotherapeutic products) decreased  
16 significantly ( $\beta = -0.081$ ,  $P < 0.001$ ). After the government price deregulation, no  
17 significant price change occurred. Neither government price regulation nor  
18 deregulation had a significant impact on average volumes of or average spending on all  
19 antineoplastic medications immediately after the policy changes or in the longer term  
20 ( $P > 0.05$ ).

21 Conclusion: Compared to unregulated antineoplastics, the prices of regulated  
22 antineoplastic medications decreased after setting price caps and did not increase after  
23 deregulation. To control the rapid growth of oncology medication expenditures, more  
24 effective measures than price regulation through price caps for traditional  
25 chemotherapy are needed.

## 26 Strengths and limitations

- 28 ● An interrupted time series (ITS) design, with two breakpoints was adopted to assess  
29 changes in price, volume of use, and spending following implementation of two  
30 price policies.
- 31 ● The study adds value to the understanding of the effects of government regulation  
32 and deregulation on the prices of cancer medications.
- 33 ● We were unable to obtain the full list of products under government price  
34 regulation since 1996, which could have led to selection bias.
- 35 ● Given our use of aggregated hospital procurement data, we could not assess policy  
36 impacts on numbers of patients treated or appropriateness of use at a given level of  
37 medication spending or use.

## 39 Introduction

40 Cancer medications account for the highest proportion of pharmaceutical spending  
41 among all therapeutic classes.<sup>1</sup> Rising cancer medication prices contribute to the rapid  
42 rise of medical and pharmaceutical expenditures, drawing criticism from leading  
43 academics, patients, cancer specialists, and policy experts.<sup>2,3,4</sup> In response, policy  
44 makers are implementing a variety of regulatory controls.<sup>5</sup>

45 International studies of the roles of regulation and competition in pharmaceutical  
46 markets have addressed various challenges and benefits of government price control  
47 policies, from different perspectives.<sup>6,7</sup> Srinivasan (2013) argues that the  
48 pharmaceutical market requires government regulation because of market failures,<sup>8</sup>  
49 such as information asymmetry and perverse incentives which affect pricing,  
50 professional behavior and competition.<sup>9</sup> Studies in a number of settings have found  
51 that direct price-cap government regulation can be effective in reducing medication  
52 prices.<sup>10,11,12</sup> However, researchers have reported favorable effects of unregulated  
53 generic market competition on medication prices<sup>13,14</sup> and argued that the high price of  
54 medications is due in part to interfering government controls.<sup>15</sup> In critics' eyes,  
55 government regulations, such as price caps, constitute a barrier to dynamic competition  
56 in the generics market, resulting in consumers not benefiting fully from competition on  
57 pharmaceutical prices.<sup>16,17,18</sup>

58 In China, the government has introduced complex medication price control policies to  
59 decrease medication prices. First, after the Urban Employee Basic Medical Insurance  
60 (UEBMI) was established in 1998, the National Development and Reform Commission  
61 (NDRC) was required to set a highest retail price using a cost-plus calculation for each  
62 medication listed in the National Reimbursement Drug List (NRDL).<sup>19,20</sup> Rules for  
63 price differences and price ratios of medicines were applied to convert a substance's  
64 price into different prices for medicines with different dosage forms or specifications.<sup>21</sup>  
65 From 1998 to 2015, the NDRC used price caps to reduce drug prices 31 times, involving  
66 1029 substances (not including traditional Chinese medicines).<sup>22,23</sup> In addition,  
67 because medication expenditures accounted for 40.4% of total health expenditures (in  
68 2009) and almost 70% of medication sales were in hospitals (in 2013),<sup>24,25</sup> since 2010,  
69 provinces had to conduct a centralized bidding and tendering process to procure all  
70 hospital medications, with the intent to decrease prices and curb medication  
71 expenditures.<sup>26</sup>

72 In October 2012, the NDRC established maximum retail prices for specific products  
73 listed in the 2009 National Reimbursement List, including 36 antineoplastic  
74 medications.<sup>27</sup> Following the central government's requirement to limit regulatory  
75 controls in economic management, China loosened administrative controls over  
76 medication prices and the NDRC formally abolished price ceiling policies in 2015.<sup>28</sup>  
77 Price decreases and increased use of price-regulated medications after the 2012 price  
78 regulation and price increases after the 2015 government price deregulation were  
79 expected. However, the effects of government price regulation and deregulation on  
80 anticancer medications is unknown. We studied the impacts of NDRC price regulation

1  
2  
3 81 and deregulation on the relative prices and sales volumes of and spending on  
4 82 antineoplastic medications in China.  
5  
6  
7 83

## 8 84 **Methods**

### 10 85 **Study design**

12 86 We used the strongest quasi-experimental design, an interrupted time series (ITS)  
13 87 design,<sup>29</sup> with two breakpoints to assess changes following implementation of two  
14 88 price policies. The first breakpoint, October 2012, served to assess the effects of the  
15 89 government retail price regulation that was announced on September 14<sup>th</sup>, 2012 and  
16 90 came into effect on October 8<sup>th</sup>, 2012. The second breakpoint, June 2015, served to  
17 91 assess the effects of government retail price deregulation that was announced on May  
18 92 4<sup>th</sup>, 2015 and came into effect on June 1<sup>st</sup>, 2015. To compare the effects of each policy  
19 93 intervention, we conducted analyses of medication groups for which 2012 price caps  
20 94 were and were not applied. The intervention group of medications had retail price caps  
21 95 since October 2012 and the control group was without price caps throughout the study  
22 96 period. We use the term ‘price-regulated medications’ for the medicines that were under  
23 97 price regulation during the intervention period; these products are no longer price  
24 98 regulated. (Figure 1) We hypothesized that the impacts of price regulation or  
25 99 deregulation on purchase prices, volumes, and spending would differ between the two  
26 100 groups.  
27  
28  
29  
30  
31  
32  
33 101  
34 102  
35  
36  
37 103 Figure 1. Timeline of price regulation and deregulation of 52 antineoplastic  
38 104 medications  
39  
40 105 **Data source**

41 106 Data on products purchased between October 2011 and June 2016 were extracted from  
42 107 the observational Chinese Medical Economic Information (CMEI) database of public  
43 108 hospital medication purchasing records.<sup>30</sup> We conducted a search of all antineoplastic  
44 109 medications in the database by ATC code (L01).<sup>31</sup> We excluded those antineoplastic  
45 110 medications with missing data. We included antineoplastic medications that were  
46 111 regulated in October 2012 as intervention group. Antineoplastic medications which  
47 112 were not listed in the NDRL and thus not subject to price caps during the study period  
48 113 constituted the control group. We extracted procurement data for 52 antineoplastic  
49 114 medications (30 medications with retail price caps from October 2012 to June 2015 and  
50 115 22 medications without any price caps from the year before to the year after the price  
51 116 policy changes, between October 2011 and June 2016, Supplement 1A and 1B) from  
52 117 699 public hospitals, including 476 tertiary hospitals, 217 secondary hospitals and 6  
53 118 primary health facilities in 28 of the 31 provinces in China. Aggregated procurement  
54 119 data was accessed to based on data elements in the dataset for each product comprised  
55 120 the International Nonproprietary Name (INN), dosage form, strength, manufacturer,

121 medication purchase price per package, monthly purchasing volumes and monthly  
122 hospital spending.

### 123 **Outcome measures**

124 The primary outcome was the Lp, an index formula used in price statistics for  
125 measuring the price development over time of baskets of goods and services consumed  
126 in the base period 0 by weighting prices by the volume purchased in period 0.<sup>32</sup> In this  
127 study, the Lp was calculated based on equation (1):

$$128 \quad L_{pt} = \frac{\sum P_{ijt} Q_{ij0}}{\sum P_{ij0} Q_{ij0}} \quad (1)$$

129 where  $P_{ijt}$  stands for price of medication  $i$  with strength  $j$  in periods  $t$ , and  $Q_{ij0}$  stands  
130 for the volume for this medication used in period 0;  $P$  and  $Q$  were calculated in terms  
131 of Defined Daily Doses (DDD). The DDD used in this paper were the recommended  
132 daily amounts of each study medication based on dosage regimens recommended in the  
133 manufacturers' instructions, as approved by China Food and Drug Administration  
134 (CFDA). A Lp value of less than 1 means that the price of the basket of goods in a given  
135 period of time was lower than that in period 0, and a Lp greater 1 means that the basket  
136 price has increased from baseline. The currency of price and spending was Chinese  
137 Yuan (CNY).<sup>33</sup>

138 Other outcomes of interest were average monthly purchasing volumes (number of DDD)  
139 of and average monthly hospital spending (CNY) on the 30 price-regulated, 22 price-  
140 unregulated and all 52 pharmaceuticals. All price and spending data were adjusted to  
141 October 2011 prices using the consumer price index for health care.<sup>34</sup>

### 142 **Statistical Analysis**

143 We assessed outcomes over time for price-regulated medications (intervention group),  
144 price-unregulated medications (control group) and all 52 products together. We also  
145 modeled intervention effects using the monthly differences in outcomes in the two  
146 groups to estimate the relative impacts of regulation and deregulation among the  
147 regulated products, controlling for any other externalities that may have affected  
148 outcomes in the control group products.

149 ITS models were used to estimate levels and trends of the outcomes in the pre-  
150 intervention periods and changes in levels and trends in the post-intervention periods.  
151 ITS models with two interruption points were formulated to detect the effect on Lp,  
152 monthly average purchasing volumes and spending, as in equation (2):

$$153 \quad Y_{it} = \beta_0 + \beta_1 \times time_t + \beta_2 \times regulation + \beta_3 \times reg\_trend + \beta_4 \\ 154 \quad \times deregulation + \beta_5 \times der\_trend + \varepsilon_{it} \quad (2)$$

156



1  
2  
3 157 We used  $\beta_0$  to estimate the baseline purchasing volume and spending;  $\beta_1$  estimated  
4 158 the pre-regulation trend;  $\beta_2$  estimated the change in level after the regulation policy;  
5 159  $\beta_3$  estimated the change in trend after the regulation policy;  $\beta_4$  estimated the change  
6 160 in level after the deregulation policy;  $\beta_5$  estimated the change in trend after the  
7 161 deregulation policy. Key coefficients were  $\beta_2$ ,  $\beta_3$ ,  $\beta_4$  and  $\beta_5$ . To estimate the  
8 162 combined level and trend impacts of the policy changes, we calculated the absolute  
9 163 difference in  $Y_{it}$  at 12 months after regulation and after deregulation, respectively,  
10 164 compared to the counterfactual, that is, the estimated  $Y_{it}$  had the intervention not  
11 165 happened.<sup>35</sup>

12  
13  
14  
15 166 We performed the Durbin-Watson test to estimate level of residual autocorrelations<sup>36</sup>  
16 167 and used the Cochrane-Orcutt auto-regression procedure to correct for first order  
17 168 serially correlated errors when needed.<sup>37</sup> All analyses were performed using Stata  
18 169 14.0.<sup>38</sup>

## 19 20 21 22 170 **Patient and public involvement**

23  
24 171 There were no patients and public involved in in the design or planning of the study.  
25  
26  
27 172

## 28 29 173 **Study Results**

### 30 31 174 **Influence of Government Pricing Policies on Relative Purchase Prices**

32 175 The Lp declined over time in both intervention and control medication groups (that is,  
33 176 prices decreased relative to baseline) (Table 1, Figure 2). After government price  
34 177 regulation in October 2012, the Lp for price-regulated medications dropped suddenly  
35 178 (level change  $\beta = -0.082$ ,  $P < 0.001$ ), with significant declines in Lp relative to price-  
36 179 unregulated medications ( $\beta = -0.081$ ,  $P < 0.001$ ). At 12 months after the regulation,  
37 180 there was an estimated reduction in the Lp for price-regulated medications of 0.058 ( $P$   
38 181  $< 0.05$ ) and an estimated increase in the Lp for price-unregulated of 0.029 ( $P < 0.05$ ).

39  
40  
41  
42 182 After the government price deregulation in June 2015, the Lp for price-unregulated  
43 183 medications decreased significantly (level change  $\beta = -0.013$ ,  $P < 0.05$ ), but no  
44 184 significant discontinuities in Lp levels or trends were observed for the price-regulated  
45 185 medications or for the relative change compared to price-unregulated medications. At  
46 186 12 months after price deregulation, there was no change in Lp for price regulated  
47 187 medications and an estimated reduction in the Lp for price-unregulated medications of  
48 188 0.043 ( $P < 0.05$ ).

49  
50  
51  
52 189

53  
54 190  
55  
56  
57  
58  
59  
60

191 Table 1. Results of interrupted time series analyses of the impacts of government price  
 192 regulation and deregulation on Laspeyres Price Index, monthly average purchase  
 193 volumes and spending for price-regulated, price-unregulated, and all antineoplastic  
 194 medications, as well as group differences, 2011-2016

|                                                 | Baseline level | Baseline trend | Post-regulation level change | Post-regulation trend change | Change at 12 months after regulation | Post-deregulation level change | Post-deregulation trend change | Change at 12 months after deregulation |
|-------------------------------------------------|----------------|----------------|------------------------------|------------------------------|--------------------------------------|--------------------------------|--------------------------------|----------------------------------------|
| <b>Lp Price Index</b>                           |                |                |                              |                              |                                      |                                |                                |                                        |
| All medications                                 | 0.993***       | -0.004*        | -0.057***                    | 0.001                        | -0.032                               | -0.005                         | 0.001                          | -0.013                                 |
| Price-regulated medications                     | 0.988***       | -0.004*        | -0.082***                    | 0.001                        | -0.058*                              | -0.003                         | 0.002                          | 0.000                                  |
| Price-unregulated medications                   | 1.006***       | -0.003***      | 0.002                        | 0.001                        | 0.029*                               | -0.013*                        | 0.000                          | -0.043*                                |
| Difference between groups                       | -0.015         | -0.002         | -0.081***                    | 0.001                        | -0.071                               | 0.005                          | 0.002                          | 0.043*                                 |
| <b>Hospital Purchase Volume (Thousand DDD)</b>  |                |                |                              |                              |                                      |                                |                                |                                        |
| All medications                                 | 38.086***      | 0.915          | 1.938                        | -0.525                       | -4.881                               | -0.176                         | -0.311                         | -4.218                                 |
| Price-regulated medications                     | 58.502***      | 1.447          | 3.325                        | -0.862                       | -7.878                               | -1.605                         | -0.527                         | -8.455                                 |
| Price-unregulated medications                   | 10.242***      | 0.193          | 0.004                        | -0.068                       | -0.879                               | 1.798                          | -0.017                         | 1.573                                  |
| Difference between groups                       | 48.252***      | 1.258          | 3.273                        | -0.798                       | -7.097                               | -3.370                         | -0.510                         | -10.003                                |
| <b>Hospital Purchase Spending (Million CNY)</b> |                |                |                              |                              |                                      |                                |                                |                                        |
| All medications                                 | 11.129***      | 0.168          | -0.092                       | -0.083                       | -0.854                               | 0.257                          | -0.063                         | -0.945                                 |
| Price-regulated medications                     | 12.628***      | 0.239          | -0.778                       | -0.178                       | -2.821                               | -0.323                         | -0.013                         | -0.912                                 |
| Price-unregulated medications                   | 9.085***       | 0.073          | 0.832                        | 0.048                        | 1.806                                | 1.052                          | -0.132                         | -0.992                                 |
| Difference between groups                       | 3.614***       | 0.158*         | -1.570**                     | -0.219**                     | -4.508*                              | -1.301*                        | 0.117                          | 0.122                                  |

195 \*, P ≤ 0.05; \*\*, P ≤ 0.01; \*\*\*, P ≤ 0.001; price-regulated medications: 30 antineoplastic products  
 196 with price regulation in 2012 and deregulation in 2015; price-unregulated medications: 22 antineoplastic  
 197 products without price regulation or deregulation; DDD=defined daily doses; CNY = Chinese Yuan (1  
 198 CNY = 0.155 US\$ in 2011)

199

200

201 Figure 2. Influence of government price regulation and deregulation on monthly  
 202 Laspeyres index (Lp) among price-regulated medications (n=30), price-unregulated  
 203 medications (n = 22), all medications (n = 52), and the difference between regulated  
 204 and unregulated medications, 2011-2016.

205

## 206 **Influence of Government Pricing Policies on Average Purchase Volumes**

207 The average volume purchased of all 52 antineoplastic medications, measured in DDD,  
208 rose from 33,370 DDD in October 2011 to 66,189 DDD in June 2016 (Table 1, Figure  
209 3. There were no statistically significant changes in volume levels or trends after  
210 government price regulation or deregulation in any group.

211  
212 Figure 3. Influence of government price regulation and deregulation on monthly  
213 average purchase volumes among price-regulated medications (n = 30), price-  
214 unregulated medications (n = 22), all medications (n = 52), and the difference between  
215 groups, 2011-2016.

## 217 **Influence of Government Pricing Policies on Hospital Spending**

218 Average hospital spending on all antineoplastic medications rose from 9.86 million  
219 CNY in October 2011 to 17.08 million CNY in June 2016 (Table 1, Figure 4). There  
220 were no statistically significant changes in spending levels or trends after government  
221 price regulation or deregulation in any of the groups. However, the spending on price-  
222 regulated medications decreased and spending on price-unregulated medications  
223 increased after both the regulation and deregulation policies, resulting in significant  
224 level and trend changes in the differences between the two groups. After government  
225 price regulation, the spending difference decreased suddenly (level change  $\beta = -1.570$ ,  
226  $P < 0.01$ ) and increased somewhat more slowly ( $\beta = -0.219$ ,  $P < 0.01$ ) than in the  
227 baseline period. At 12 months after regulation, the absolute spending difference  
228 between the groups was significantly lower (-4.508 million CNY,  $P < 0.05$ ) than would  
229 have been expected without the regulation.

230 After the deregulation policy was implemented, the spending difference dropped again  
231 (level change  $\beta = -1.301$ ,  $P < 0.01$ ), although followed by an increasing trend ( $\beta = 0.117$ ,  
232  $P < 0.05$ ). By the end of follow-up, the relative difference between groups had returned  
233 to nearly the level expected based on the trend at the time of the price regulation policy.

234  
235 Figure 4. Influence of government price regulation and deregulation on monthly  
236 average spending on price-regulated medications (n = 30), price-unregulated  
237 medications (n = 22), all medications (n = 52), and difference between groups, 2011-  
238 2016.

## 240 **Discussion**

241 In this study, we investigated the effects of maximum retail price regulation and  
242 subsequent deregulation for groups of antineoplastic medications in China. We found  
243 that after setting maximum retail prices, the relative price of regulated products fell and

1  
2  
3 244 that of price-unregulated products increased; the price of all studied medications as a  
4 245 group decreased significantly compared to the 2011 baseline price; after government  
5 246 deregulation, no significant change occurred in either group. Neither setting  
6 247 maximum retail prices nor price deregulation significantly affected volumes purchased  
7 248 or spending on regulated or unregulated medications. However, compared to price-  
8 249 unregulated medications, spending on price-regulated medications dropped  
9 250 significantly after price regulation and deregulation.

13 251 Our results indicate that, as expected, a price-cap policy was effective in decreasing  
14 252 the prices of selected antineoplastic medications. Most medicines in the intervention  
15 253 group were products with intense market competition, possibly facilitating  
16 254 implementation of price caps. We have previously shown this effect for digestive  
17 255 system medications,<sup>39</sup> and others have found similar decreases in price for  
18 256 antihyperlipidemic agents.<sup>40</sup> This might not be the case for originator products with  
19 257 only one supplier in the market. Such medicines were not price-regulated at the time.

23 258 We did not find the expected price increase after deregulation for the price-regulated  
24 259 medications. This could be due to the fact that medication prices in China are also  
25 260 influenced by the provincial tendering system. Since 2009, the medication tendering  
26 261 process is conducted at the provincial level, with different assessment criteria, usually  
27 262 a composite score of product quality and price, to determine the winner.<sup>41</sup> Hence, the  
28 263 tendering mechanism could have constrained medication price increases after  
29 264 government deregulation.<sup>42</sup> The provincial tendering process could also explain the  
30 265 price decreases in both groups observed prior to the national government price  
31 266 regulation. Further, generic entry, particularly for the older price-regulated cytotoxic  
32 267 medications, may explain why relative medication prices did not increase after  
33 268 government price deregulation. With the Chinese government encouraging the  
34 269 development of pharmaceutical enterprises, more generic medications have come to  
35 270 the market, which might improve the availability and the affordability of  
36 271 antineoplastic agents.<sup>43</sup>

41 272 We found no significant changes in purchase volumes or spending on either price-  
42 273 regulated or price-unregulated medications. When prices of regulated products  
43 274 decreased in comparison to price-unregulated products following the introduction of  
44 275 maximum retail prices, we did not observe a compensatory increase in the use of  
45 276 regulated products, but spending on products in the price-regulated group decreased.  
46 277 Medication utilization and spending were likely also affected by reimbursement  
47 278 policies, which restricted the total hospital spending on insurance-listed and price-  
48 279 regulated products but not on unregulated medications.<sup>44,45</sup>

52 280 Finally, prescribers may have maintained a preference for the newer, more expensive  
53 281 medications in the price-unregulated group.<sup>46</sup> Studies in China<sup>47</sup> and Italy<sup>48</sup>, have  
54 282 shown that volume and medication utilization mix, rather than prices, determine overall  
55 283 medication expenditures. This may indicate that it is difficult to manage medication  
56 284 spending increases solely by regulating the prices of some medications in a therapeutic  
57 285 class. Before 2015, China's Drugs Price Mark-up Policy allowed hospitals to charge

1  
2  
3  
4  
5  
6  
7  
8  
9  
10  
11  
12  
13  
14  
15  
16  
17  
18  
19  
20  
21  
22  
23  
24  
25  
26  
27  
28  
29  
30  
31  
32  
33  
34  
35  
36  
37  
38  
39  
40  
41  
42  
43  
44  
45  
46  
47  
48  
49  
50  
51  
52  
53  
54  
55  
56  
57  
58  
59  
60

286 and keep 15% of the medication sales budget,<sup>49</sup> and hospitals were incentivized to  
287 preferentially prescribe higher priced products.<sup>50</sup> Since 2015, the zero mark-up policy  
288 which bans mark-ups by public health facilities has been gradually introduced to all  
289 medications at all public hospitals, presumably eliminating these incentives to use more  
290 and higher-priced medications.<sup>51</sup> However, prescribing habits developed prior to the  
291 zero mark-up policy may still prevail.

292

### 293 **Limitations**

294 The study had some limitations. First, we were unable to obtain the full list of products  
295 under government price regulation since 1996, which could lead to selection bias.  
296 Second, an inherent limitation of the Laspeyres index may lead to underestimating price  
297 decreases. However, the impact of this limitation should be limited, since price  
298 elasticity of demand for medicines is relatively small. Third, the comparison group of  
299 price-unregulated oncology medications tended to include newer, more expensive  
300 products than the price-regulated group and the two groups differed in other  
301 characteristics such as indications and therapeutic status in treatment. However, the Lp  
302 trends observed at baseline in the two groups of products were quite similar, suggesting  
303 that differential changes observed following the government pricing policies were  
304 indicative of true differences. Fourth, given that our analyses are based on aggregated  
305 procurement data, we have no information on indications of use and potential  
306 therapeutic substitution and cannot assess impacts of individual product generic and  
307 brand status. Fifth, some new antineoplastic drugs are not included in the NRDL and  
308 thus are not price-regulated. These drugs may be made available by manufacturers'  
309 access programs ("buy 3 get 3 free") for individual patients. These products would not  
310 be part of our price, volume, or spending analyses because they would be transacted  
311 directly between individual physicians, their patients, and the manufacturer (or an  
312 intermediary). However, the number of patients who participate in access programs is  
313 limited and almost 70% of medication sales in China occur in hospitals.<sup>52</sup> Sixth, given  
314 our use of aggregated hospital procurement data, we could not assess factors such as  
315 the numbers of patients treated or appropriate use given levels of medication spending  
316 or volume.

317

### 318 **Conclusion**

319 Compared to unregulated antineoplastics, the prices of regulated antineoplastic  
320 medications decreased after setting price caps and did not increase after deregulation.  
321 Neither of these policies affected volumes purchased or hospital spending on  
322 antineoplastic medications. To control the rapid growth of oncology medication  
323 expenditures, more effective measures than setting price caps for selected (typically  
324 older) antineoplastic medications are needed.

325

1  
2  
3 326 **Acknowledgements**  
4

5 327 We thank staff of Chinese Pharmaceutical Association for their support and cooperation  
6 328 in data access and analysis.  
7

8 329

9  
10 330 **Competing Interests:**  
11

12 331 The authors declared no competing interests.  
13

14 332

15  
16 333 **Funding**  
17

18 334 This study was funded by National Natural Science Foundation of China (Grant  
19 335 No.71774005). The funders had no role in study design, data collection and analysis,  
20 336 decision to publish, or preparation of the manuscript. Dr. Wagner received partial  
21 337 support from the Department of Population Medicine Ebert Award.  
22  
23

24 338

25  
26 339 **Ethics approval and consent to participate**  
27

28 340 The study was considered non-human subjects research by the Harvard Pilgrim Health  
29 341 Care Institutional Review Board.  
30

31 342

32  
33 343 **Data availability statement**  
34

35 344 Data on products purchased between October 2011 and June 2016 were extracted from  
36 345 the observational Chinese Medical Economic Information (CMEI) database of public  
37 346 hospital medication purchasing records. This data is unavailable to the public due to its  
38 347 confidentiality. Researchers interested in the data need to contact Chinese  
39 348 Pharmaceutical Association.  
40  
41

42 349

43  
44 350 **Copyright**  
45

46 351 The Corresponding Author has the right to grant on behalf of all authors and does grant  
47 352 on behalf of all authors, a worldwide licence to the Publishers and its licensees in  
48 353 perpetuity, in all forms, formats and media (whether known now or created in the  
49 354 future), to i) publish, reproduce, distribute, display and store the Contribution, ii)  
50 355 translate the Contribution into other languages, create adaptations, reprints, include  
51 356 within collections and create summaries, extracts and/or, abstracts of the Contribution,  
52 357 iii) create any other derivative work(s) based on the Contribution, iv) to exploit all  
53 358 subsidiary rights in the Contribution, v) the inclusion of electronic links from the  
54 359 Contribution to third party material where-ever it may be located; and, vi) licence any  
55 360 third party to do any or all of the above.  
56  
57  
58  
59

60 361

362 **Reference**

- 1 Prasad V, De Jesús K, Mailankody S. The high price of anticancer drugs: origins, implications, barriers, solutions. *Nat Rev Clin Oncol*. 2017 Jun;14(6):381-390.
- 2 Mailankody, S, Prasad, V. Five years of cancer drug approvals: innovation, efficacy, and costs. *JAMA Oncol*. 2015 Jul;1(4):539-40.
- 3 Tefferi A, Kantarjian H, Rajkumar S V, et al. In support of a patient-driven initiative and petition to lower the high price of cancer drugs. *Mayo Clin Proc*. 2015 Aug;90(8):996-1000.
- 4 Ezekiel Emanuel. We can't afford the drugs that could cure cancer. *The Wall Street Journal*. 2018 Sep. <https://www.wsj.com/articles/we-cant-afford-the-drugs-that-could-cure-cancer-1537457740>
- 5 Ess SM, Schneeweiss S, Szucs TD. European healthcare policies for controlling drug expenditure. *Pharmacoeconomics*. 2003;21(2):89-103.
- 6 Stargardt T, Schreyögg J, Busse R. Pricing behaviour of pharmacies after market deregulation for OTC drugs: The case of Germany. *Health Policy*. 2007 Nov;84(1):30-8.
- 7 Puig-Junoy J, López-Valcárcel BG. Launch price for new pharmaceuticals in the heavily regulated and subsidized Spanish market, 1995–2007. *Health Policy*. 2014 Jun;116(2-3):170-81.
- 8 Srinivasan S, Srikrishna T, Phadke A. Drug price control order 2013. As good as a leaky bucket[J]. *Economic and Political Weekly*, 2013, 29(6): 130.
- 9 De Jaegher K, Jegers M. A model of physician behaviour with demand inducement. *J Health Econ*. 2000 Mar;19(2):231-258.
- 10 Danzon PM, Epstein AJ. Effects of regulation on drug launch and pricing in interdependent markets. *Adv Health Econ Health Serv Res*. 2012;23:35-71.
- 11 Puig-Junoy J . Impact of European Pharmaceutical Price Regulation on Generic Price Competition[J]. *PharmacoEconomics*, 2010, 28(8):649-663.
- 12 Brekke K R , Grasdahl A L , Holms T H . Regulation and pricing of pharmaceuticals: Reference pricing or price cap regulation?[J]. *European Economic Review*, 2009, 53.
- 13 Reiffen D , Ward M R . Generic Drug Industry Dynamics[J]. *Review of Economics and Statistics*, 2005, 87(1):37-49.
- 14 Magazzini L , Pammolli F , Riccaboni M . Dynamic Competition in Pharmaceuticals: Patent Expiry, Generic Penetration, and Industry Structure[J]. *MPRA Paper*, 2004, 5(2):175-182.
- 15 Wu B, Zhang Q, Qiao X. Evaluation of the China's pharmaceutical price regulations using a macro data during 1997-2008. *J Asia Pacific Econ*. 2015 Apr 3;20(2):290-329.
- 16 Miziara NM, Coutinho DR. Problems in the regulatory policy of the drug market. *Rev Saude Publica*. 2015;49:35.
- 17 Danzon, Patricia M. and Chao, Li-Wei, Does Regulation Drive Out Competition in Pharmaceutical Markets?. *Journal of Law and Economics*, Vol. 43, No. 2, October 2000. Available at SSRN: <https://ssrn.com/abstract=231772>
- 18 Ekelund, M., & Persson, B. (2003). Pharmaceutical pricing in a regulated market. *The Review of Economics and Statistics*, 85(2), 298–306.
- 19 National Development and Reform Commission. Notice on the Government Pricing Scheme for Medicines [Original language: Chinese][OL].[2003-10-21]. [http://zwgk.gd.gov.cn/006939828/201308/t20130830\\_399800.html](http://zwgk.gd.gov.cn/006939828/201308/t20130830_399800.html). Accessed 2019-09-05.
- 20 National Development and Reform Commission. List of Priced Drugs of the National Development and Reform Commission [Original language: Chinese][OL].[2019-03-25].

- 1  
2  
3  
4  
5 [http://www.ndrc.gov.cn/fzgggz/jggl/zcfg/200508/t20050802\\_747962.html](http://www.ndrc.gov.cn/fzgggz/jggl/zcfg/200508/t20050802_747962.html)  
6 21 National Development and Reform Commission. Notice on the Government Pricing Scheme for  
7 Immune system, Anti-cancer and Blood system Medicines. [Original language:  
8 Chinese][OL].[2019-09-  
9 06].[http://www.ndrc.gov.cn/fzgggz/jggl/zcfg/201209/t20120918\\_505462.html](http://www.ndrc.gov.cn/fzgggz/jggl/zcfg/201209/t20120918_505462.html).  
10  
11 22 Sabirina Luk (2015) The Politics of Drug Price Control Policy in China: Regulation,  
12 Deregulation and Re-regulation, *Journal of Contemporary East Asia Studies*, 4:1, 41-54, DOI:  
13 10.1080/24761028.2015.11869080.  
14  
15 23 National Development and Reform Commission. List of Priced Drugs of the National  
16 Development and Reform Commission [Original language: Chinese][OL].[2019-03-25].  
17 [http://www.ndrc.gov.cn/fzgggz/jggl/zcfg/200508/t20050802\\_747962.html](http://www.ndrc.gov.cn/fzgggz/jggl/zcfg/200508/t20050802_747962.html).  
18  
19 24 Tie-Min Z , Cong-Cong W , Feng G . Results and Analysis of China Total Expenditure on Health  
20 in 2009[J]. *Chinese Health Economics*, 2011.  
21  
22 25 WAN Quan, ZHANG Yu-hui, WANG Xiu-feng. Results and Analysis of China National Health  
23 Accounts in 2013[J]. *Chinese Health Economics*.2015,03.  
24  
25 26 Hasan Syed Shahzad, Kow Chia Siang, Dawoud Dalia, et al. Pharmaceutical Policy Reforms to  
26 Regulate Drug Prices in Asia Pacific Region: The Case of Australia, China, India, Malaysia, New  
27 Zealand, and South Korea. *Value in health regional issues*. 2018 Nov; 18-23.  
28 DOI:10.1016/j.vhri.2018.08.007  
29  
30 27 National Development and Reform Commission. Notice on the Government Pricing Scheme for  
31 Immune system, Anti-cancer and Blood system Medicines. [Original language:  
32 Chinese][OL].[2019-09-  
33 06].[http://www.ndrc.gov.cn/fzgggz/jggl/zcfg/201209/t20120918\\_505462.html](http://www.ndrc.gov.cn/fzgggz/jggl/zcfg/201209/t20120918_505462.html)  
34  
35 28 National Development and Reform Commission. Abolishment of government (guided) pricing  
36 for the majority of drugs and push to the drug pricing reform [Original language:  
37 Chinese][OL].[2015-05-  
38 04][http://www.ndrc.gov.cn/fzgggz/jggl/zcfg/201505/t20150505\\_748470.html](http://www.ndrc.gov.cn/fzgggz/jggl/zcfg/201505/t20150505_748470.html). Accessed 2019-09-  
39 05.  
40  
41 29 Wagner AK, Soumerai SB, Zhang F, et al. Segmented regression analysis of interrupted time  
42 series studies in medication use research[J]. *J Clin Pharm Ther*. 2002 Aug, 27(4):299-309.  
43  
44 30 Science and Technology Development Center of Chinese Pharmaceutical Association. Brief  
45 Introduction to CMEI[OL]. [http://www.cmei.org.cn/list/?343\\_1.html](http://www.cmei.org.cn/list/?343_1.html). Accessed 2019-11-10.  
46  
47 31 WHO Collaborating Centre for Drug Statistics Methodology. New ATC codes 2019 [OL]. Apr  
48 14, 2019.  
49 [https://www.whocc.no/atc\\_ddd\\_index/updates\\_included\\_in\\_the\\_atc\\_ddd\\_index/new\\_atc\\_codes\\_2](https://www.whocc.no/atc_ddd_index/updates_included_in_the_atc_ddd_index/new_atc_codes_2019/)  
50 019/  
51  
52 32 Danzon D P M , Kim J D . International Price Comparisons for Pharmaceuticals[J].  
53 *PharmacoEconomics*, 1998, 14(1 Supplement):115-128.  
54  
55 33 International Monetary Fund. Inter national Financial Statistics[OL]. Apr 20, 2019.  
56 <https://data.worldbank.org.cn/indicator/PA.NUS.FCRF?locations=CN>  
57  
58 34 National Bureau of Statistics of China. Time Series Data -- Monthly Data: Consumer Price  
59 Index[OL]. Jan 14, 2019. <http://www.stats.gov.cn/english/Statisticaldata>  
60  
35 Zhang F, Wagner AK, Soumerai SB, et al. Methods for estimating confidence intervals in



- 1  
2  
3  
4  
5 interrupted time series analyses of health interventions[J]. *J Clin Epidemiol*. 2009 Feb, 62(2):143-  
6 8. doi: 10.1016/j.jclinepi.2008.08.007.
- 7 36 J. DURBIN, G. S. WATSON; TESTING FOR SERIAL CORRELATION IN LEAST  
8 SQUARES REGRESSION. I, *Biometrika*, Volume 37, Issue 3-4, 1 December 1950, Pages 409–  
9 428, <https://doi.org/10.1093/biomet/37.3-4.409>.
- 10 37Kutner MH, Nachtsheim CJ, Neter J. *Applied Linear Regression Models* (4th edn),  
11 Irwin/McGraw-Hill: Chicago, 2004.
- 12 38 STATA software. StataCorp LLC, College Station, TX, <https://www.stata.com/stata14/>
- 13 39 YANG Ming-chun, TIAN Ye, ZOU Wu-jie, et al. Influence of government regulation and  
14 deregulation on the drugs' price: A case study in digestive drug (in Chinese). *Chinese Journal of*  
15 *Health Policy*. 2018 Sep; 11(9): 53-58.
- 16 40 Kwon H Y , Hong J M , Godman B , et al. Price cuts and drug spending in South Korea: The  
17 case of antihyperlipidemic agents[J]. *Health Policy*, 2013, 112(3):217-226.
- 18 41 Oortwijn W, Mathijssen J, Banta D. The role of health technology assessment on pharmaceutical  
19 reimbursement in selected middle-income countries. *Health Policy (New York)* 2010;95: 174–84.
- 20 42 Liu J, Wang L, Liu C, et al. Impact of price deregulation policy on the affordability of essential  
21 medicines for women's health: a panel data analysis.[J]. *Expert Review of Pharmacoeconomics &*  
22 *Outcomes Research*, 2017:1.
- 23 43 Guan X , Tian Y , Ross-Degnan D , et al. Interrupted time-series analysis of the impact of generic  
24 market entry of antineoplastic products in China[J]. *BMJ Open*, 2018, 8(7).
- 25 44 Tang S , Tao J , Bekedam H . Controlling Cost Escalation of Healthcare: Making Universal  
26 Health Coverage Sustainable in China[J]. *BMC Public Health*, 2012, 12 Suppl 1(Suppl 1):S8.
- 27 45 Huang Y , Liu Y , Yang X , et al. Global budget payment system helps to reduce outpatient  
28 medical expenditure of hypertension in China[J]. *SpringerPlus*, 2016, 5(1):1877.
- 29 46 Zhou Zhongliang, Yanfang Su, Benjamin Campbell, et al. The Financial Impact of the 'Zero-  
30 Markup Policy for Essential Drugs' on Patients in County Hospitals in Western Rural China. *PLoS*  
31 *One*. 2015;10(3). <http://dx.doi.org/10.1371/journal.pone.0121630>
- 32 47 Meng Q, Cheng G, Silver L, Sun X, Rehnberg C, Tomson G. The impact of China's retail drug  
33 price control policy on hospital expenditures: a case study in two Shandong hospitals. *Health Policy*  
34 *Plan*. 2005 May;20(3):185-96.
- 35 48 Addis A, Magrini N. New approaches to analysing prescription data and to transfer  
36 pharmacoepidemiological and evidence-based reports to prescribers. *Pharmacoepidemiol Drug Saf*.  
37 2002 Dec;11(8):721-6.
- 38 49 Mao Wenhui, Huyen Vu, Zening Xie, et al. Systematic Review on Irrational use of Medicines in  
39 China and Vietnam. *PLoS One*. 2015;10(3). <http://dx.doi.org/10.1371/journal.pone.0117710>
- 40 50 Yip W , Hsiao W . China's health care reform: A tentative assessment[J]. *China Economic*  
41 *Review*, 2009, 20(4):0-619.
- 42 51 Hu J , Mossialos E , Kesteloot K , et al. Pharmaceutical pricing and reimbursement in China:  
43 When the whole is less than the sum of its parts[J]. *Health Policy*, 2016, 120(5):519-534.
- 44 52 WAN Quan, ZHANG Yu-hui, WANG Xiu-feng. Results and Analysis of China National Health  
45 Accounts in 2013[J]. *Chinese Health Economics*.2015,03.
- 46  
47  
48  
49  
50  
51  
52  
53  
54  
55  
56  
57  
58  
59  
60

1  
2  
3  
4  
5  
6  
7  
8  
9  
10  
11  
12  
13  
14  
15  
16  
17  
18  
19  
20  
21  
22  
23  
24  
25  
26  
27  
28  
29  
30  
31  
32  
33  
34  
35  
36  
37  
38  
39  
40  
41  
42  
43  
44  
45  
46  
47  
48  
49  
50  
51  
52  
53  
54  
55  
56  
57  
58  
59  
60

1  
2  
3  
4  
5  
6  
7  
8  
9  
10  
11  
12  
13  
14  
15  
16  
17  
18  
19  
20  
21  
22  
23  
24  
25  
26  
27  
28  
29  
30  
31  
32  
33  
34  
35  
36  
37  
38  
39  
40  
41  
42  
43  
44  
45  
46  
47  
48  
49  
50  
51  
52  
53  
54  
55  
56  
57  
58  
59  
60



Figure 1. Timeline of price regulation and deregulation of 52 antineoplastic medications



Figure 2. Influence of government price regulation and deregulation on monthly Laspeyres index (Lp) among price-regulated medications (n=30), price-unregulated medications (n = 22), all medications (n = 52), and the difference between regulated and unregulated medications, 2011-2016.

139x101mm (300 x 300 DPI)



Figure 3. Influence of government price regulation and deregulation on monthly average purchase volumes among price-regulated medications (n = 30), price-unregulated medications (n = 22), all medications (n = 52), and the difference between groups, 2011-2016.

139x101mm (300 x 300 DPI)



Figure 4. Influence of government price regulation and deregulation on monthly average spending on price-regulated medications (n = 30), price-unregulated medications (n = 22), all medications (n = 52), and difference between groups, 2011-2016.

139x101mm (300 x 300 DPI)

## Supplement 1A. Antineoplastic medications samples of the intervention group

| Generic Name | ATC     | Classification | Manufactures <sup>1</sup> | Indications Approved in China                                                                                                                                                        |
|--------------|---------|----------------|---------------------------|--------------------------------------------------------------------------------------------------------------------------------------------------------------------------------------|
| aclarubicin  | L01DB04 | chemotherapy   | originator only           | acute leukemia; malignant lymphoma;                                                                                                                                                  |
| altretamine  | L01XX03 | chemotherapy   | generic only              | ovarian cancer; small cell lung cancer; malignant lymphoma; endometrial cancers;                                                                                                     |
| asparaginase | L01XX02 | chemotherapy   | originator and generic    | acute lymphoblastic leukemia, ALL; acute myeloid leukemia, AML; acute monocytic leukemia, AMOL; chronic myeloid leukemia, CML; Hodgkin's lymphoma; non-Hodgkin's lymphoma; melanoma; |
| bleomycin    | L01DC01 | chemotherapy   | originator and generic    | Cutaneous Carcinoma; head and neck cancer; lung cancer; esophageal cancer; malignant lymphoma; cervical carcinoma; neuroglioma; thyroid carcinoma;                                   |
| busulfan     | L01AB01 | chemotherapy   | originator only           | chronic myeloid leukemia; Essential Thrombocythemia, polycythemia vera and other chronic myeloproliferative disorders, CMPDs                                                         |
| carboplatin  | L01XA02 | chemotherapy   | originator and generic    | ovarian cancer; small cell lung cancer; head and neck squamous cell carcinoma;                                                                                                       |
| carmofur     | L01BC04 | chemotherapy   | generic only              | gastrointestinal cancer(colon cancer, colorectal cancer, gastric cancer, esophagus cancer); breast cancer;                                                                           |
| carmustine   | L01AD01 | chemotherapy   | generic only              | encephaloma; brain metastases; meningeal leukemia; malignant lymphoma; multiple myeloma; malignant melanoma;                                                                         |
| dacarbazine  | L01AX04 | chemotherapy   | generic only              | melanoma; soft tissue tumor; malignant lymphoma;                                                                                                                                     |

|    |                     |         |              |                        |                                                                                                                                                                        |
|----|---------------------|---------|--------------|------------------------|------------------------------------------------------------------------------------------------------------------------------------------------------------------------|
| 1  |                     |         |              |                        |                                                                                                                                                                        |
| 2  |                     |         |              |                        |                                                                                                                                                                        |
| 3  |                     |         |              |                        |                                                                                                                                                                        |
| 4  |                     |         |              |                        |                                                                                                                                                                        |
| 5  | daunorubicin        | L01DB02 | chemotherapy | generic only           | acute myeloid leukemia, AML; acute lymphoblastic leukemia, ALL;                                                                                                        |
| 6  |                     |         |              |                        |                                                                                                                                                                        |
| 7  |                     |         |              |                        |                                                                                                                                                                        |
| 8  | docetaxel           | L01CD02 | chemotherapy | originator and generic | breast cancer; non-small cell lung cancer;                                                                                                                             |
| 9  |                     |         |              |                        |                                                                                                                                                                        |
| 10 |                     |         |              |                        |                                                                                                                                                                        |
| 11 | doxifluridine       | /       | chemotherapy | generic only           | Breast cancer; gastric cancer; colorectal cancer; nasopharyngeal cancer;                                                                                               |
| 12 |                     |         |              |                        |                                                                                                                                                                        |
| 13 |                     |         |              |                        |                                                                                                                                                                        |
| 14 | epirubicin          | L01DB03 | chemotherapy | originator and generic | leukemia; malignant lymphoma; multiple myeloma; breast cancer; lung cancer; soft tissue tumor; gastric cancer; liver cancer; colorectal cancer; ovarian cancer;        |
| 15 |                     |         |              |                        |                                                                                                                                                                        |
| 16 |                     |         |              |                        |                                                                                                                                                                        |
| 17 |                     |         |              |                        |                                                                                                                                                                        |
| 18 | etoposide           | L01CB01 | chemotherapy | generic only           | small cell lung cancer; malignant lymphoma; leukemia; neuroblastoma; rhabdomyosarcom; gastric cancer; esophageal carcinoma; malignant germ cell tumor; ovarian cancer; |
| 19 |                     |         |              |                        |                                                                                                                                                                        |
| 20 |                     |         |              |                        |                                                                                                                                                                        |
| 21 |                     |         |              |                        |                                                                                                                                                                        |
| 22 |                     |         |              |                        |                                                                                                                                                                        |
| 23 | fludarabine         | L01BB05 | chemotherapy | originator and generic | chronic lymphocytic leukemia;                                                                                                                                          |
| 24 |                     |         |              |                        |                                                                                                                                                                        |
| 25 |                     |         |              |                        |                                                                                                                                                                        |
| 26 |                     |         |              |                        |                                                                                                                                                                        |
| 27 | fluorouracil        | L01BC02 | chemotherapy | generic only           | Gastrointestinal Cancer; chorionepithelioma; breast cancer; Ovarian Carcinoma; lung cancer; cervical carcinoma; bladder cancer; skin cancer;                           |
| 28 |                     |         |              |                        |                                                                                                                                                                        |
| 29 |                     |         |              |                        |                                                                                                                                                                        |
| 30 | gemcitabine         | L01BC05 | chemotherapy | originator and generic | non-small cell lung cancer; pancreatic cancer; breast cancer;                                                                                                          |
| 31 |                     |         |              |                        |                                                                                                                                                                        |
| 32 |                     |         |              |                        |                                                                                                                                                                        |
| 33 |                     |         |              |                        |                                                                                                                                                                        |
| 34 | hydroxycamptothecin | /       | chemotherapy | originator and generic | primary liver cancer; gastric cancer; bladder cancer; rectal cancer; head and neck epithelial cancer; leukemia and other malignant tumors                              |
| 35 |                     |         |              |                        |                                                                                                                                                                        |
| 36 |                     |         |              |                        |                                                                                                                                                                        |
| 37 | lobaplatin          | /       | chemotherapy | originator only        | breast cancer; small cell lung cancer; chronic myeloid leukemia                                                                                                        |
| 38 |                     |         |              |                        |                                                                                                                                                                        |
| 39 |                     |         |              |                        |                                                                                                                                                                        |
| 40 |                     |         |              |                        |                                                                                                                                                                        |
| 41 |                     |         |              |                        |                                                                                                                                                                        |
| 42 |                     |         |              |                        |                                                                                                                                                                        |
| 43 |                     |         |              |                        |                                                                                                                                                                        |
| 44 |                     |         |              |                        |                                                                                                                                                                        |
| 45 |                     |         |              |                        |                                                                                                                                                                        |
| 46 |                     |         |              |                        |                                                                                                                                                                        |



|    |                                           |         |              |                        |                                                                                                                                  |
|----|-------------------------------------------|---------|--------------|------------------------|----------------------------------------------------------------------------------------------------------------------------------|
| 1  |                                           |         |              |                        |                                                                                                                                  |
| 2  |                                           |         |              |                        |                                                                                                                                  |
| 3  |                                           |         |              |                        |                                                                                                                                  |
| 4  |                                           |         |              |                        |                                                                                                                                  |
| 5  | nedaplatin                                | /       | chemotherapy | generic only           | Solid tumors such as head and neck cancer, small cell lung cancer, non-small cell lung cancer and esophageal cancer              |
| 6  |                                           |         |              |                        |                                                                                                                                  |
| 7  |                                           |         |              |                        |                                                                                                                                  |
| 8  | nimustine                                 | L01AD06 | chemotherapy | originator and generic | brain tumor; gastrointestinal cancer; lung cancer; malignant lymphoma; chronic leukemia;                                         |
| 9  |                                           |         |              |                        |                                                                                                                                  |
| 10 |                                           |         |              |                        |                                                                                                                                  |
| 11 | oxaliplatin                               | L01XA03 | chemotherapy | originator and generic | colorectal carcinoma; hepatocellular carcinoma, HCC;                                                                             |
| 12 |                                           |         |              |                        |                                                                                                                                  |
| 13 |                                           |         |              |                        |                                                                                                                                  |
| 14 | semustine                                 | L01AD03 | chemotherapy | generic only           | brain tumor; malignant lymphoma; gastric cancer; colon cancer; melanoma;                                                         |
| 15 |                                           |         |              |                        |                                                                                                                                  |
| 16 | tegafur                                   | L01BC03 | chemotherapy | generic only           | Gastrointestinal Cancer; breast cancer;                                                                                          |
| 17 | tegafur, gimeracil and oteracil porassium | L01BC53 | chemotherapy | generic only           | gastrointestinal cancer( gastric cancer; intestinal cancer; pancreatic cancer); breast cancer; liver cancer;                     |
| 18 |                                           |         |              |                        |                                                                                                                                  |
| 19 |                                           |         |              |                        |                                                                                                                                  |
| 20 | temozolomide                              | L01AX03 | chemotherapy | originator and generic | glioblastoma multiforme, GBM; anaplastic astrocytoma;                                                                            |
| 21 |                                           |         |              |                        |                                                                                                                                  |
| 22 |                                           |         |              |                        |                                                                                                                                  |
| 23 | teniposide                                | L01CB02 | chemotherapy | originator and generic | malignant lymphoma; central nervous system-tumors; bladder cancer;                                                               |
| 24 |                                           |         |              |                        |                                                                                                                                  |
| 25 |                                           |         |              |                        |                                                                                                                                  |
| 26 | topotecan                                 | L01XX17 | chemotherapy | originator and generic | small cell lung cancer; ovarian cancer;                                                                                          |
| 27 |                                           |         |              |                        |                                                                                                                                  |
| 28 |                                           |         |              |                        |                                                                                                                                  |
| 29 | vindesine                                 | L01CA03 | chemotherapy | generic only           | non-small cell lung cancer; small cell lung cancer; malignant lymphoma; breast cancer; esophageal carcinoma; malignant melanoma; |
| 30 |                                           |         |              |                        |                                                                                                                                  |
| 31 |                                           |         |              |                        |                                                                                                                                  |
| 32 |                                           |         |              |                        |                                                                                                                                  |
| 33 | vinorelbine                               | L01CA04 | chemotherapy | originator and generic | non-small cell lung cancer; breast cancer;                                                                                       |
| 34 |                                           |         |              |                        |                                                                                                                                  |

<sup>1</sup> Manufactures of specific medications during our study period.

## Supplement 1B. Antineoplastic medications samples of the control group

| Generic Name              | ATC     | Classification   | Manufactures <sup>1</sup> | Indications Approved in China                                                                                                                                       |
|---------------------------|---------|------------------|---------------------------|---------------------------------------------------------------------------------------------------------------------------------------------------------------------|
| actinomycin D             | L01DA01 | chemotherapy     | originator and generic    | Hodgkin's disease; neuroblastoma; choriocarcinoma; testicular cancer; Wilms'tumor; Ewing's sarcoma; rhabdomyosarcoma                                                |
| amsacrine                 | L01XX01 | chemotherapy     | generic only              | acute leukemia; malignant lymphoma;                                                                                                                                 |
| arsenite                  | L01XX27 | chemotherapy     | generic only              | acute promyelocytic leukemia, APL; liver cancer;                                                                                                                    |
| bortezomib                | L01XX32 | targeted therapy | originator and generic    | multiple myeloma; mantle cell lymphoma;                                                                                                                             |
| cetuximab                 | L01XC06 | targeted therapy | originator only           | colorectal cancer;                                                                                                                                                  |
| decitabine                | L01BC08 | chemotherapy     | originator and generic    | myelodysplastic syndrome(MDS);                                                                                                                                      |
| doxorubicin               | L01DB01 | chemotherapy     | originator and generic    | acute myeloid leukemia; lymphoma; soft tissue tumor and osteosarcoma; children malignant tumour; solid tumor in adults; particularly breast cancer and lung cancer; |
| erlotinib                 | L01XE03 | targeted therapy | originator only           | non-small cell lung cancer;                                                                                                                                         |
| floxuridine               | L01BC09 | chemotherapy     | generic only              | liver cancer; rectum cancer; esophageal cancer; gastric cancer; breast cancer;lung cancer;                                                                          |
| fluorouracil combinations | L01BC52 | chemotherapy     | generic only              | gastrointestinal cancer; breast cancer; liver cancer;                                                                                                               |
| gefitinib                 | L01XE02 | targeted therapy | originator only           | non-small cell lung cancer;                                                                                                                                         |
| idarubicin                | L01DB06 | chemotherapy     | originator only           | acute myeloid leukemia, AML; acute lymphoblastic leukemia, ALL;                                                                                                     |

1  
2  
3  
4  
5  
6  
7  
8  
9  
10  
11  
12  
13  
14  
15  
16  
17  
18  
19  
20  
21  
22  
23  
24  
25  
26  
27  
28  
29  
30  
31  
32  
33  
34  
35  
36  
37  
38  
39  
40  
41  
42  
43  
44  
45  
46

|             |         |                  |                        |                                                                                                                                    |
|-------------|---------|------------------|------------------------|------------------------------------------------------------------------------------------------------------------------------------|
| imatinib    | L01XE01 | targeted therapy | originator and generic | chronic myeloid leukemia, CML; gastrointestinal stromal tumors, GIST; acute lymphoblastic leukemia, ALL;                           |
| raltitrexed | L01BA03 | chemotherapy     | originator only        | colorectal cancer;                                                                                                                 |
| rituximab   | L01XC02 | targeted therapy | originator only        | follicle Center Lymphomas; follicular non-Hodgkin's lymphom; diffuse large B-cell lymphoma;                                        |
| sunitinib   | L01XE04 | targeted therapy | originator only        | renal cell cancer, RCC; gastrointestinal stromal tumors, GIST; pancreatic neuroendocrine tumors, pNET;                             |
| sorafenib   | L01XE05 | targeted therapy | originator only        | renal cell cancer; hepatocellular carcinoma; thyroid cancer;                                                                       |
| tioguanine  | L01BB03 | chemotherapy     | generic only           | acute lymphocytic leukemia; acute non-lymphocytic leukemia; chronic myeloid leukemia;                                              |
| nilotinib   | L01XE08 | targeted therapy | originator only        | chronic myeloid leukemia;                                                                                                          |
| trastuzumab | L01XC03 | targeted therapy | originator only        | breast cancer; gastric cancer;                                                                                                     |
| thiotepa    | L01AC01 | chemotherapy     | generic only           | breast cancer; ovarian cancer; bladder cancer; gastrointestinal cancer;                                                            |
| vinblastine | L01CA01 | chemotherapy     | generic only           | acute leukemia; Hodgkin's lymphoma; malignant melanoma; breast cancer; bronchogenic carcinoma; soft tissue sarcoma; neuroblastoma; |

<sup>1</sup> Manufactures of specific medications during our study period.

## STROBE Statement—checklist of items that should be included in reports of observational studies

|                              | Item No | Recommendation                                                                                                                                                                                                                                                                                                                                                                                                                                                                                                                                                                                                                                                                                                                                                    |
|------------------------------|---------|-------------------------------------------------------------------------------------------------------------------------------------------------------------------------------------------------------------------------------------------------------------------------------------------------------------------------------------------------------------------------------------------------------------------------------------------------------------------------------------------------------------------------------------------------------------------------------------------------------------------------------------------------------------------------------------------------------------------------------------------------------------------|
| <b>Title and abstract</b>    | 1       | (a) Indicate the study's design with a commonly used term in the title or the abstract <b>【1】</b><br>(b) Provide in the abstract an informative and balanced summary of what was done and what was found <b>【2】</b>                                                                                                                                                                                                                                                                                                                                                                                                                                                                                                                                               |
| <b>Introduction</b>          |         |                                                                                                                                                                                                                                                                                                                                                                                                                                                                                                                                                                                                                                                                                                                                                                   |
| Background/rationale         | 2       | Explain the scientific background and rationale for the investigation being reported <b>【3】</b>                                                                                                                                                                                                                                                                                                                                                                                                                                                                                                                                                                                                                                                                   |
| Objectives                   | 3       | State specific objectives, including any prespecified hypotheses <b>【4】</b>                                                                                                                                                                                                                                                                                                                                                                                                                                                                                                                                                                                                                                                                                       |
| <b>Methods</b>               |         |                                                                                                                                                                                                                                                                                                                                                                                                                                                                                                                                                                                                                                                                                                                                                                   |
| Study design                 | 4       | Present key elements of study design early in the paper <b>【4】</b>                                                                                                                                                                                                                                                                                                                                                                                                                                                                                                                                                                                                                                                                                                |
| Setting                      | 5       | Describe the setting, locations, and relevant dates, including periods of recruitment, exposure, follow-up, and data collection <b>【4】</b>                                                                                                                                                                                                                                                                                                                                                                                                                                                                                                                                                                                                                        |
| Participants                 | 6       | (a) <i>Cohort study</i> —Give the eligibility criteria, and the sources and methods of selection of participants. Describe methods of follow-up <b>【N/A】</b><br><i>Case-control study</i> —Give the eligibility criteria, and the sources and methods of case ascertainment and control selection. Give the rationale for the choice of cases and controls <b>【N/A】</b><br><i>Cross-sectional study</i> —Give the eligibility criteria, and the sources and methods of selection of participants <b>【N/A】</b><br>(b) <i>Cohort study</i> —For matched studies, give matching criteria and number of exposed and unexposed <b>【N/A】</b><br><i>Case-control study</i> —For matched studies, give matching criteria and the number of controls per case <b>【N/A】</b> |
| Variables                    | 7       | Clearly define all outcomes, exposures, predictors, potential confounders, and effect modifiers. Give diagnostic criteria, if applicable <b>【5】</b>                                                                                                                                                                                                                                                                                                                                                                                                                                                                                                                                                                                                               |
| Data sources/<br>measurement | 8*      | For each variable of interest, give sources of data and details of methods of assessment (measurement). Describe comparability of assessment methods if there is more than one group <b>【4】</b>                                                                                                                                                                                                                                                                                                                                                                                                                                                                                                                                                                   |
| Bias                         | 9       | Describe any efforts to address potential sources of bias <b>【N/A】</b>                                                                                                                                                                                                                                                                                                                                                                                                                                                                                                                                                                                                                                                                                            |
| Study size                   | 10      | Explain how the study size was arrived at <b>【N/A】</b>                                                                                                                                                                                                                                                                                                                                                                                                                                                                                                                                                                                                                                                                                                            |
| Quantitative variables       | 11      | Explain how quantitative variables were handled in the analyses. If applicable, describe which groupings were chosen and why <b>【5】</b>                                                                                                                                                                                                                                                                                                                                                                                                                                                                                                                                                                                                                           |
| Statistical methods          | 12      | (a) Describe all statistical methods, including those used to control for confounding <b>【5】</b><br>(b) Describe any methods used to examine subgroups and interactions <b>【5】</b><br>(c) Explain how missing data were addressed <b>【5】</b><br>(d) <i>Cohort study</i> —If applicable, explain how loss to follow-up was addressed <b>【N/A】</b><br><i>Case-control study</i> —If applicable, explain how matching of cases and controls was addressed <b>【N/A】</b><br><i>Cross-sectional study</i> —If applicable, describe analytical methods taking account of sampling strategy <b>【N/A】</b><br>(e) Describe any sensitivity analyses <b>【N/A】</b>                                                                                                            |

1  
2  
3  
4  
5  
6  
7  
8  
9  
10  
11  
12  
13  
14  
15  
16  
17  
18  
19  
20  
21  
22  
23  
24  
25  
26  
27  
28  
29  
30  
31  
32  
33  
34  
35  
36  
37  
38  
39  
40  
41  
42  
43  
44  
45  
46  
47  
48  
49  
50  
51  
52  
53  
54  
55  
56  
57  
58  
59  
60

Continued on next page

For peer review only

| <b>Results</b>           |     |                                                                                                                                                                                                                                                                                                                                                                                                                                                        |
|--------------------------|-----|--------------------------------------------------------------------------------------------------------------------------------------------------------------------------------------------------------------------------------------------------------------------------------------------------------------------------------------------------------------------------------------------------------------------------------------------------------|
| Participants             | 13* | (a) Report numbers of individuals at each stage of study—eg numbers potentially eligible, examined for eligibility, confirmed eligible, included in the study, completing follow-up, and analysed <b>【N/A】</b><br>(b) Give reasons for non-participation at each stage <b>【N/A】</b><br>(c) Consider use of a flow diagram <b>【N/A】</b>                                                                                                                 |
| Descriptive data         | 14* | (a) Give characteristics of study participants (eg demographic, clinical, social) and information on exposures and potential confounders <b>【N/A】</b><br>(b) Indicate number of participants with missing data for each variable of interest <b>【N/A】</b><br>(c) <i>Cohort study</i> —Summarise follow-up time (eg, average and total amount) <b>【N/A】</b>                                                                                             |
| Outcome data             | 15* | <i>Cohort study</i> —Report numbers of outcome events or summary measures over time <b>【N/A】</b><br><i>Case-control study</i> —Report numbers in each exposure category, or summary measures of exposure <b>【N/A】</b><br><i>Cross-sectional study</i> —Report numbers of outcome events or summary measures <b>【N/A】</b>                                                                                                                               |
| Main results             | 16  | (a) Give unadjusted estimates and, if applicable, confounder-adjusted estimates and their precision (eg, 95% confidence interval). Make clear which confounders were adjusted for and why they were included <b>【6-10】</b><br>(b) Report category boundaries when continuous variables were categorized <b>【6-10】</b><br>(c) If relevant, consider translating estimates of relative risk into absolute risk for a meaningful time period <b>【N/A】</b> |
| Other analyses           | 17  | Report other analyses done—eg analyses of subgroups and interactions, and sensitivity analyses <b>【6-10】</b>                                                                                                                                                                                                                                                                                                                                           |
| <b>Discussion</b>        |     |                                                                                                                                                                                                                                                                                                                                                                                                                                                        |
| Key results              | 18  | Summarise key results with reference to study objectives <b>【10-11】</b>                                                                                                                                                                                                                                                                                                                                                                                |
| Limitations              | 19  | Discuss limitations of the study, taking into account sources of potential bias or imprecision. Discuss both direction and magnitude of any potential bias <b>【11】</b>                                                                                                                                                                                                                                                                                 |
| Interpretation           | 20  | Give a cautious overall interpretation of results considering objectives, limitations, multiplicity of analyses, results from similar studies, and other relevant evidence <b>【11】</b>                                                                                                                                                                                                                                                                 |
| Generalisability         | 21  | Discuss the generalisability (external validity) of the study results <b>【11】</b>                                                                                                                                                                                                                                                                                                                                                                      |
| <b>Other information</b> |     |                                                                                                                                                                                                                                                                                                                                                                                                                                                        |
| Funding                  | 22  | Give the source of funding and the role of the funders for the present study and, if applicable, for the original study on which the present article is based <b>【12】</b>                                                                                                                                                                                                                                                                              |

\*Give information separately for cases and controls in case-control studies and, if applicable, for exposed and unexposed groups in cohort and cross-sectional studies.

**Note:** An Explanation and Elaboration article discusses each checklist item and gives methodological background and published examples of transparent reporting. The STROBE checklist is best used in conjunction with this article (freely available on the Web sites of PLoS Medicine at <http://www.plosmedicine.org/>, Annals of Internal Medicine at <http://www.annals.org/>, and Epidemiology at <http://www.epidem.com/>). Information on the STROBE Initiative is available at [www.strobe-statement.org](http://www.strobe-statement.org).
