# Supplementary material for: Influence of government price regulation and deregulation on the price of antineoplastic medications in China: a controlled interrupted time series study
Source: PubMed Central journal article supplement — BMJ Open. 2019 Nov 28;9(11):e031658. doi: 10.1136/bmjopen-2019-031658 (PMC6924745; doi:10.1136/bmjopen-2019-031658), 2019-11-28
Supplement: bmjopen-2019-031658supp001.pdf [file bmjopen-2019-031658supp001.pdf]

## Supplement 1A. Antineoplastic medications samples of the intervention group

| Generic Name | ATC     | Classification | Manufactures <sup>1</sup> | Indications Approved in China                                                                                                                                                        |
|--------------|---------|----------------|---------------------------|--------------------------------------------------------------------------------------------------------------------------------------------------------------------------------------|
| aclarubicin  | L01DB04 | chemotherapy   | originator only           | acute leukemia; malignant lymphoma;                                                                                                                                                  |
| altretamine  | L01XX03 | chemotherapy   | generic only              | ovarian cancer; small cell lung cancer; malignant lymphoma; endometrial cancers;                                                                                                     |
| asparaginase | L01XX02 | chemotherapy   | originator and generic    | acute lymphoblastic leukemia, ALL; acute myeloid leukemia, AML; acute monocytic leukemia, AMOL; chronic myeloid leukemia, CML; Hodgkin's lymphoma; non-Hodgkin's lymphoma; melanoma; |
| bleomycin    | L01DC01 | chemotherapy   | originator and generic    | Cutaneous Carcinoma; head and neck cancer; lung cancer; esophageal cancer; malignant lymphoma; cervical carcinoma; neuroglioma; thyroid carcinoma;                                   |
| busulfan     | L01AB01 | chemotherapy   | originator only           | chronic myeloid leukemia; Essential Thrombocythemia, polycythemia vera and other chronic myeloproliferative disorders, CMPDs                                                         |
| carboplatin  | L01XA02 | chemotherapy   | originator and generic    | ovarian cancer; small cell lung cancer; head and neck squamous cell carcinoma;                                                                                                       |
| carmofur     | L01BC04 | chemotherapy   | generic only              | gastrointestinal cancer(colon cancer, colorectal cancer, gastric cancer, esophagus cancer); breast cancer;                                                                           |
| carmustine   | L01AD01 | chemotherapy   | generic only              | encephaloma; brain metastases; meningeal leukemia; malignant lymphoma; multiple myeloma; malignant melanoma;                                                                         |
| dacarbazine  | L01AX04 | chemotherapy   | generic only              | melanoma; soft tissue tumor; malignant lymphoma;                                                                                                                                     |

|                     |         |              |                        |                                                                                                                                                                        |
|---------------------|---------|--------------|------------------------|------------------------------------------------------------------------------------------------------------------------------------------------------------------------|
| daunorubicin        | L01DB02 | chemotherapy | generic only           | acute myeloid leukemia, AML; acute lymphoblastic leukemia, ALL;                                                                                                        |
| docetaxel           | L01CD02 | chemotherapy | originator and generic | breast cancer; non-small cell lung cancer;                                                                                                                             |
| doxifluridine       | /       | chemotherapy | generic only           | Breast cancer; gastric cancer; colorectal cancer; nasopharyngeal cancer;                                                                                               |
| epirubicin          | L01DB03 | chemotherapy | originator and generic | leukemia; malignant lymphoma; multiple myeloma; breast cancer; lung cancer; soft tissue tumor; gastric cancer; liver cancer; colorectal cancer; ovarian cancer;        |
| etoposide           | L01CB01 | chemotherapy | generic only           | small cell lung cancer; malignant lymphoma; leukemia; neuroblastoma; rhabdomyosarcom; gastric cancer; esophageal carcinoma; malignant germ cell tumor; ovarian cancer; |
| fludarabine         | L01BB05 | chemotherapy | originator and generic | chronic lymphocytic leukemia;                                                                                                                                          |
| fluorouracil        | L01BC02 | chemotherapy | generic only           | Gastrointestinal Cancer; chorionepithelioma; breast cancer; Ovarian Carcinoma; lung cancer; cervical carcinoma; bladder cancer; skin cancer;                           |
| gemcitabine         | L01BC05 | chemotherapy | originator and generic | non-small cell lung cancer; pancreatic cancer; breast cancer;                                                                                                          |
| hydroxycamptothecin | /       | chemotherapy | originator and generic | primary liver cancer; gastric cancer; bladder cancer; rectal cancer; head and neck epithelial cancer; leukemia and other malignant tumors                              |
| lobaplatin          | /       | chemotherapy | originator only        | breast cancer; small cell lung cancer; chronic myeloid leukemia                                                                                                        |

|                                           |         |              |                        |                                                                                                                                  |
|-------------------------------------------|---------|--------------|------------------------|----------------------------------------------------------------------------------------------------------------------------------|
| nedaplatin                                | /       | chemotherapy | generic only           | Solid tumors such as head and neck cancer, small cell lung cancer, non-small cell lung cancer and esophageal cancer              |
| nimustine                                 | L01AD06 | chemotherapy | originator and generic | brain tumor; gastrointestinal cancer; lung cancer; malignant lymphoma; chronic leukemia;                                         |
| oxaliplatin                               | L01XA03 | chemotherapy | originator and generic | colorectal carcinoma; hepatocellular carcinoma, HCC;                                                                             |
| semustine                                 | L01AD03 | chemotherapy | generic only           | brain tumor; malignant lymphoma; gastric cancer; colon cancer; melanoma;                                                         |
| tegafur                                   | L01BC03 | chemotherapy | generic only           | Gastrointestinal Cancer; breast cancer;                                                                                          |
| tegafur, gimeracil and oteracil porassium | L01BC53 | chemotherapy | generic only           | gastrointestinal cancer( gastric cancer; intestinal cancer; pancreatic cancer); breast cancer; liver cancer;                     |
| temozolomide                              | L01AX03 | chemotherapy | originator and generic | glioblastoma multiforme, GBM; anaplastic astrocytoma;                                                                            |
| teniposide                                | L01CB02 | chemotherapy | originator and generic | malignant lymphoma; central nervous system-tumors; bladder cancer;                                                               |
| topotecan                                 | L01XX17 | chemotherapy | originator and generic | small cell lung cancer; ovarian cancer;                                                                                          |
| vindesine                                 | L01CA03 | chemotherapy | generic only           | non-small cell lung cancer; small cell lung cancer; malignant lymphoma; breast cancer; esophageal carcinoma; malignant melanoma; |
| vinorelbine                               | L01CA04 | chemotherapy | originator and generic | non-small cell lung cancer; breast cancer;                                                                                       |

<sup>1</sup> Manufactures of specific medications during our study period.

## Supplement 1B. Antineoplastic medications samples of the control group

| Generic Name              | ATC     | Classification   | Manufactures <sup>1</sup> | Indications Approved in China                                                                                                                                       |
|---------------------------|---------|------------------|---------------------------|---------------------------------------------------------------------------------------------------------------------------------------------------------------------|
| actinomycin D             | L01DA01 | chemotherapy     | originator and generic    | Hodgkin's disease; neuroblastoma; choriocarcinoma; testicular cancer; Wilms'tumor; Ewing's sarcoma; rhabdomyosarcoma                                                |
| amsacrine                 | L01XX01 | chemotherapy     | generic only              | acute leukemia; malignant lymphoma;                                                                                                                                 |
| arsenite                  | L01XX27 | chemotherapy     | generic only              | acute promyelocytic leukemia, APL; liver cancer;                                                                                                                    |
| bortezomib                | L01XX32 | targeted therapy | originator and generic    | multiple myeloma; mantle cell lymphoma;                                                                                                                             |
| cetuximab                 | L01XC06 | targeted therapy | originator only           | colorectal cancer;                                                                                                                                                  |
| decitabine                | L01BC08 | chemotherapy     | originator and generic    | myelodysplastic syndrome(MDS);                                                                                                                                      |
| doxorubicin               | L01DB01 | chemotherapy     | originator and generic    | acute myeloid leukemia; lymphoma; soft tissue tumor and osteosarcoma; children malignant tumour; solid tumor in adults; particularly breast cancer and lung cancer; |
| erlotinib                 | L01XE03 | targeted therapy | originator only           | non-small cell lung cancer;                                                                                                                                         |
| floxuridine               | L01BC09 | chemotherapy     | generic only              | liver cancer; rectum cancer; esophageal cancer; gastric cancer; breast cancer;lung cancer;                                                                          |
| fluorouracil combinations | L01BC52 | chemotherapy     | generic only              | gastrointestinal cancer; breast cancer; liver cancer;                                                                                                               |
| gefitinib                 | L01XE02 | targeted therapy | originator only           | non-small cell lung cancer;                                                                                                                                         |
| idarubicin                | L01DB06 | chemotherapy     | originator only           | acute myeloid leukemia, AML; acute lymphoblastic leukemia, ALL;                                                                                                     |

|             |         |                  |                        |                                                                                                                                    |
|-------------|---------|------------------|------------------------|------------------------------------------------------------------------------------------------------------------------------------|
| imatinib    | L01XE01 | targeted therapy | originator and generic | chronic myeloid leukemia, CML; gastrointestinal stromal tumors, GIST; acute lymphoblastic leukemia, ALL;                           |
| raltitrexed | L01BA03 | chemotherapy     | originator only        | colorectal cancer;                                                                                                                 |
| rituximab   | L01XC02 | targeted therapy | originator only        | follicle Center Lymphomas; follicular non-Hodgkin's lymphom; diffuse large B-cell lymphoma;                                        |
| sunitinib   | L01XE04 | targeted therapy | originator only        | renal cell cancer, RCC; gastrointestinal stromal tumors, GIST; pancreatic neuroendocrine tumors, pNET;                             |
| sorafenib   | L01XE05 | targeted therapy | originator only        | renal cell cancer; hepatocellular carcinoma; thyroid cancer;                                                                       |
| tioguanine  | L01BB03 | chemotherapy     | generic only           | acute lymphocytic leukemia; acute non-lymphocytic leukemia; chronic myeloid leukemia;                                              |
| nilotinib   | L01XE08 | targeted therapy | originator only        | chronic myeloid leukemia;                                                                                                          |
| trastuzumab | L01XC03 | targeted therapy | originator only        | breast cancer; gastric cancer;                                                                                                     |
| thiotepa    | L01AC01 | chemotherapy     | generic only           | breast cancer; ovarian cancer; bladder cancer; gastrointestinal cancer;                                                            |
| vinblastine | L01CA01 | chemotherapy     | generic only           | acute leukemia; Hodgkin's lymphoma; malignant melanoma; breast cancer; bronchogenic carcinoma; soft tissue sarcoma; neuroblastoma; |

<sup>1</sup> Manufactures of specific medications during our study period.
